## Proton export drives the Warburg Effect

Shonagh Russell<sup>1,2</sup>, Liping Xu<sup>1</sup>, Yoonseok Kam<sup>1</sup>, Dominique Abrahams<sup>1</sup>, Bryce Ordway<sup>1,2</sup>, Alex S. Lopex<sup>1</sup>, Marilyn Bui<sup>1</sup>, Joseph Johnson<sup>1</sup>, Tamir Epstein<sup>1</sup>, Epifanio Ruiz<sup>1</sup>, Mark C. Lloyd<sup>1</sup>, Pawel Swietach<sup>3</sup>, Daniel Verduzco<sup>1</sup>, Jonathan Wojtkowiak<sup>1</sup>, & Robert J. Gillies<sup>1\*</sup>

<sup>1</sup>*Moffitt Cancer Center, 12902 USF Magnolia Dr, Tampa, 33612, FL, USA*

<sup>2</sup>*Graduate School, University of South Florida, 4202 E Fowler Ave, Tampa, 33620, FL, USA*

<sup>3</sup>*Department of Physiology, Anatomy and Genetics, University of Oxford, Parks Road, Oxford, OX1 3PT, UK*

**RJG is supported by a grant from Helix, Biopharma. The authors declare no other potential conflicts of interest.**

**6 Figures**

1 **1 Table**

2 **86 References**

3

4 **2 Supplemental Tables**

5 **24 supplemental Figures**

6

7

Acknowledgements: **NIH U54 CA193489 (RJG); NIH R01 CA 077575-17 (RJG); NIH F99 CA234942 (SR); NIH P30 CA076292 (core grant); ERC Consolidator Award SURVIVE #723997 (PS)**

8

## Abstract

Aggressive cancers commonly ferment glucose to lactic acid at high rates, even in the presence of oxygen. This is known as aerobic glycolysis, or the “Warburg Effect”. It is widely assumed that this is a consequence of the upregulation of glycolytic enzymes. Oncogenic drivers can increase the expression of most proteins in the glycolytic pathway, including the terminal step of exporting  $H^+$  equivalents from the cytoplasm. Proton exporters maintain an alkaline cytoplasmic pH, which can enhance all glycolytic enzyme activities, even in the absence of oncogene-related expression changes. Based on this observation, we hypothesized that increased uptake and fermentative metabolism of glucose could be driven by the expulsion of  $H^+$  equivalents from the cell. To test this hypothesis, we stably transfected lowly-glycolytic MCF-7, U2-OS, and glycolytic HEK293 cells to express proton exporting systems: either PMA1 (yeast  $H^+$ -ATPase) or CAIX (carbonic anhydrase 9). The expression of either exporter *in vitro* enhanced aerobic glycolysis as measured by glucose consumption, lactate production, and extracellular acidification rate. This resulted in an increased intracellular pH, and metabolomic analyses indicated that this was associated with an increased flux of all glycolytic enzymes upstream of pyruvate kinase. These cells also demonstrated increased migratory and invasive phenotypes *in vitro*, and these were recapitulated *in vivo* by more aggressive behavior, whereby the acid-producing cells formed higher grade tumors with higher rates of metastases. Neutralizing tumor acidity with oral buffers reduced the metastatic burden. Therefore, cancer cells with increased  $H^+$  export increase intracellular alkalization, even without oncogenic driver mutations, and this is sufficient to alter cancer metabolism towards a Warburg phenotype.

## Introduction

9

In 1924, Otto Warburg and colleagues demonstrated that cancer, even in the presence of oxygen, ferments glucose to lactic acid at high rates (Warburg et al., 1924), and this was contemporaneously confirmed by the Coris (Cori and Cori, 1925). Aerobic glycolysis, commonly termed the “Warburg Effect” in cancer (DeBerardinis and Chandel, 2020; Vaupel and Multhoff, 2020), is undeniably a hallmark of primary tumors and aggressive invasive disease (Hanahan and Weinberg, 2011). This preference of tumors for aerobic glycolysis is exploited in diagnostic PET imaging of fluorodeoxyglucose ( $^{18}\text{F}$ -FDG) uptake (Kunkel et al., 2003). It is commonly believed that this increased fermentative glycolysis, and thus proton flux, is driven by oncogenes, such as RAS, MYC, HIF, and AKT (Kim et al., 2007; Wonsey et al., 2002), and that this augmented flux out-competes the ability of mitochondria to oxidize pyruvate, leading to the net production and export of lactic acid and reconversion of NADH to  $\text{NAD}^+$  to maintain redox balance. Hence, the Warburg Effect could solely be an epiphenomenon of oncogene activation, which is consistent with the observation that fermentation under aerobic conditions is energetically unfavorable and does not confer any clear evolutionary benefits (Vander Heiden et al., 2009).

We propose an alternative to this canonical view, building on principles of evolutionary dynamics (Gatenby and Gillies, 2004b). Aerobic glycolysis is such a commonly observed phenotype of aggressive cancers (Rizwan et al., 2013; Yu et al., 2015), we argue that it *MUST* confer some selective advantage for tumor growth (Damaghi et al., 2021). An inherent consequence of glycolysis is lactic acid production, and we propose that acid secretion *per se* renders cells more competitive, despite the energetic cost (Gatenby et al., 2006b; Gillies et al., 2008). Indeed, oncogenic drivers upregulate expression of proton exporting systems, e.g., sodium hydrogen antiporters, NHEs (Cardone et al., 2015; Cheng et al., 2019), carbonic anhydrase 9, CA-IX (Kopacek et al., 2005; Mahon et al., 2016; Takacova et al., 2010), and sodium-bicarbonate co-transporters, NBCs (Boedtkjer, 2019). Such activities will exacerbate the intra- to extracellular pH gradient, raising the intracellular pH (pHi) and acidifying the extracellular pH (pHe). These transporters have been associated with breast cancer aggressiveness (Beketic-Oreskovic et al., 2010). Additionally, glycolytic enzymes all exhibit

significant pH-dependence (Persi et al., 2018), and thus maintenance of an alkaline pHi would directly promote increased glycolytic flux.

Simultaneously, lowering pHe provides invading cancer cells competitive benefits that can enhance colonization, invasion, and metastasis. These benefits include extracellular matrix remodeling via release and activation of proteases to increase invasion (Kato et al., 2005; Stock and Schwab, 2009; Webb et al., 2011b), inhibition of immune surveillance (Brand et al., 2016), promotion of an epithelial-to-mesenchymal transition (EMT) (Nieto et al., 2016; Pastushenko et al., 2018; Puisieux et al., 2014; Riemann et al., 2019), and anchorage-independent growth (Damaghi et al., 2015; Jin et al., 2018; Paoli et al., 2013; Peppicelli et al., 2019). This is further supported by the observation that neutralization of pHe acidity can inhibit invasion and metastases (Estrella et al., 2013; Robey et al., 2009).

The current study investigates whether aerobic glycolysis can be driven by proton-export, and further investigates the impact of this on cancer aggressiveness. We demonstrate that over-expression of proton exporters is sufficient to increase aerobic glycolysis, through enhanced glucose uptake and lactate production. We further observed that proton export increased intracellular pH and increased metabolic flux at most steps in glycolysis. Finally, we observed *in vivo* that these proton-exporting cell lines were more aggressive, generating higher-grade tumors and increased metastases. There is a known association between acid production, aerobic glycolysis, and metastatic potential. Further, experimental metastases can be inhibited with acid-neutralizing buffers. The current work adds to this literature by demonstrating that acid production *per se* can be sufficient to drive the Warburg Effect and promote metastasis.

## RESULTS

### 10 Overexpression of CA-IX in cancer cells increases glycolytic metabolism

11 CA-IX hydrates extracellular CO<sub>2</sub> to H<sup>+</sup> + HCO<sub>3</sub><sup>-</sup>. This facilitates CO<sub>2</sub> diffusion away  
12 from the cell reducing pH gradients across tissues. The bicarbonate generated from CO<sub>2</sub>  
13 hydration, a reaction that occurs either spontaneously or is sped up by carbonic anhydrases, can  
14 then reenter the cell via Na<sup>+</sup> + HCO<sub>3</sub><sup>-</sup> co-transporter (Boedtkjer, 2019; Svastova et al., 2012).

15 Numerous studies in, e.g., breast, ovarian (Choschzick et al., 2011), and astrocytoma  
16 (Nordfors et al., 2013) cancers have shown that CA-IX expression correlates with poor prognosis

17 and reduced survival. **Figure 1A** shows the overall survival of ER+ breast cancer patients with  
18 low and high (median cutoff) CA-IX expression was 143 and 69.4 months, respectively,  $p=9.32$   
19  $e^{-7}$ . Although the sample size was smaller, a similar pattern was seen for metastasis-free  
20 survival in patients with low and high CA-IX expression, 130 vs. 50 months, respectively,  
21  $p=0.0012$ . Metastasis-free survival is also reduced in other cancers with high CA-IX expression,  
22 including cervical and colorectal (van Kuijk et al., 2016). CA-IX's role in outcome makes it a  
23 clinically significant target warranting further investigation.

24 To test the hypothesis that proton export can drive aerobic glycolysis, we established  
25 models which over-expressed proton exporters. We transfected MCF-7 cells with a CA-IX  
26 expression vector and isolated two individual clones (M1 and M6) and confirmed CA-IX protein  
27 expression (**Fig. 1B**). MCF-7 cells do not express CA-IX under normoxic conditions, but do  
28 express other carbonic anhydrases, CA-II and CA-XII (**Fig. 1B**). CA-IX is distinct among  
29 exofacial CA's (CA-IV, CA-XII), as it contains a proteoglycan domain, which enables it to  
30 maintain enzymatic activity at lower pHe (Li et al., 2011). In tissues, CA-IX can function as a  
31 "pH-stat", which tumors hijack to maintain an acidic pHe (Lee et al., 2018). We also transfected  
32 MCF-7 cells with an empty pcmv6 vector hereafter referred to as MOCK-2. Additionally, we  
33 confirmed by ICC that CA-IX, an exofacial membrane-bound protein, was expressed on the  
34 plasma membrane in both CA-IX clones (**Fig. 1C**).

35 To test our hypothesis that proton export can drive aerobic glycolysis, we interrogated the  
36 metabolism of our CA-IX expressing clones using a Seahorse XFe96 Extracellular Flux (XF)  
37 Analyzer, enzymatic, and radiochemical assays to assess both glycolytic and mitochondrial  
38 metabolism. Specifically, the Seahorse glycolytic stress tests (GST) showed that both CA-IX  
39 clones exhibited higher proton production rates (PPR) upon glucose stimulation compared to  
40 MOCK-2 or parental clones (**Fig. 1D**). Using glucose, and [ $^3\text{H}$ ]-2-deoxyglucose (2DG) uptake  
41 assays (**Fig. 1E & Supplementary Fig. 1**), and lactate production rate assays (**Fig. 1F &**  
42 **Supplementary Fig. 2**), we further confirmed CA-IX expressing clones had increased glycolysis  
43 in normoxic conditions. Mitochondrial metabolism in these clones, as measured by Seahorse  
44 mitochondrial stress test (MST), exhibited a decreased reliance on oxidative phosphorylation. In  
45 the CA-IX clones, both basal oxygen consumption rates (**Fig. 1G**) and reduced ATP-linked  
46 oxygen consumption rates (**Supplementary Fig. 3**) were decreased compared to MOCK-2 or

47 parental cells. CA-IX expressing clones also had hyperpolarized mitochondria (**Supplementary**  
 48 **Fig. 4**). Therefore, CA-IX expression did not globally upregulate all ATP turnover, but  
 49 upregulated aerobic glycolysis and limited reliance on oxidative phosphorylation.

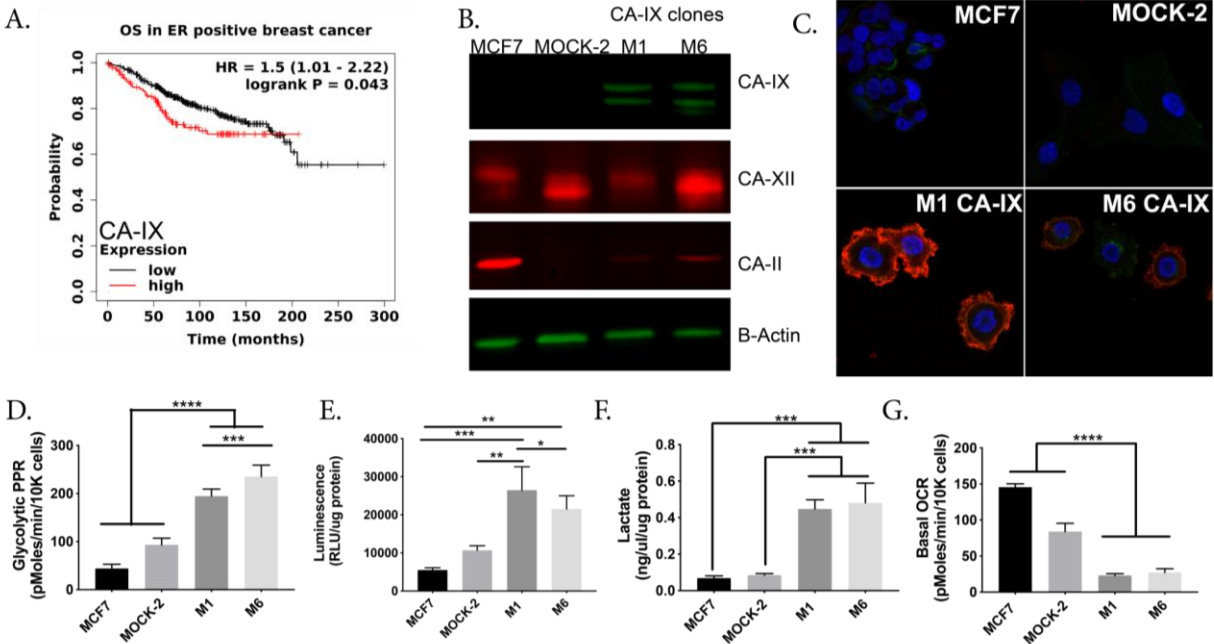

50  
 51 **Figure 1: Over-expression of CA-IX in MCF-7 breast cancer cells increases glycolytic metabolism in vitro**  
 52 **A:** Overall survival Kaplan-Meier Curve in ER-positive breast cancer comparing low and high CA9 gene  
 53 expression n=1402 (kmplot.com). Statistical analysis using Log rank P test p=0.0024. **B:** Immunoblotting of  
 54 protein lysates from MCF-7 cells transfected with empty vector (MOCK-2) or Ca9 vector (M1 and M6). Proteins  
 55 from total cell extracts were immunoblotted for CA-IX, CA-II, CA-XII, and B-actin (loading control). **C:**  
 56 Representative immunocytochemistry images of CA-IX protein expression in MCF-7, MOCK-2, and CA-IX  
 57 clones M1 and M6. CA-IX clones (M1 & M6) exhibit CA-IX membrane staining, whereas MOCK-2 and parental  
 58 MCF-7 cells do not. DAPI nuclear stain (blue), Wheat germ agglutinin membrane stain (green), and CA-IX stain  
 59 (red). **D:** Glycolysis associated proton production rate (PPR) using the Seahorse extracellular flux analyzer,  
 60 measured post glucose injection. Data are shown as mean  $\pm$  SD, N=8 biological replicates per group, statistical  
 61 analysis using ordinary one-way ANOVA. **E:** Glucose uptake of cells in each group over 24hr, measured as  
 62 luminescence generated using Glucose Uptake-Glo assay (Promega). N=3, statistical analysis using ordinary  
 63 one-way ANOVA. **F:** Lactate measured in extracellular media after 24hr using Sigma kit. N=3 biological  
 64 replicated per group, statistical analysis using ordinary one-way ANOVA. **G:** Basal oxygen consumption rate  
 65 (OCR) measured using the Seahorse extracellular flux analyzer in 5.8mM glucose concentration. Data are shown  
 66 as mean  $\pm$  SD, N=8 biological replicates per group, statistical analysis using ordinary one-way ANOVA.  
 67 \*p<0.05, \*\*p<0.01, \*\*\*p<0.001, \*\*\*\*p<0.0001

68  
 69 To investigate whether these metabolic alterations were specific to the MCF-7 cells, we  
 70 tested other cell lines. CA-IX was over-expressed in U2-OS osteosarcoma human cells and HEK  
 71 293 human embryonic kidney cells. CA-IX expression upregulated glycolysis in both cell lines,  
 72 as seen by increased aerobic lactate production (**Supplementary Figs. 5 & 6**). Even in HEK 293

73 cells, which have higher basal glycolysis than the other cell lines tested, over-expression of the  
74 proton exporting CA-IX still enhanced their rate of aerobic glycolysis.

75 To delineate which steps in glycolysis were being impacted by acid export, we analyzed  
76 the intracellular metabolites using mass spectrometry and a library of known metabolites (see  
77 methods). Principal component analysis (PCA) showed a statistically significant separation of  
78 MOCK-2 and parental MCF-7 from the CA-IX clones (**Fig. 2A**). Notably, PCA also showed that  
79 the parental and MOCK-2 cells had distinct metabolic profiles, but neither overlapped with the  
80 CA-IX clones. Consistent with this, heatmap visualization of the top 50 most significantly  
81 altered metabolites showed that the two CA-IX clones exhibited similar metabolic profiles (**Fig.**  
82 **2B**) but were considerably different from the MOCK-2 and parental clones. MOCK-2 cells grow  
83 more rapidly *in vitro* compared to the parental MCF-7 or the CA-IX clones which is likely why  
84 they exhibit a different metabolic profile from the parental line (**Supplementary Fig. 7**). We  
85 note later, however, that this difference in growth rate was not maintained *in vivo* when grown as  
86 primary tumors (**Fig.4A**). Out of all metabolites assessed, the glycolytic intermediates were  
87 consistently altered in the CA-IX clones compared to parental or MOCK-2.

88 The CA-IX clones exhibited increased levels of all glycolytic intermediates upstream of  
89 pyruvate kinase, PK (**Fig. 2C-J**), which catalyzes the penultimate step of glycolysis: the  
90 conversion of phosphoenolpyruvate (PEP) + ADP → pyruvate +ATP. Thus, it appears that the  
91 activities of the upstream enzymes have increased, leading PK to now become rate-limiting for  
92 glycolytic flux in the CA-IX expressing cells (**Fig. 2J**). As the CA-IX cells have higher  
93 glycolytic flux (**Fig. 1D-F**), the most straightforward interpretation is that CA-IX expression de-  
94 inhibited all of the enzymatic steps upstream of PK. Overall, CA-IX expression enhances  
95 glycolytic intermediates' flux, resulting in enhanced lactate and acid production.

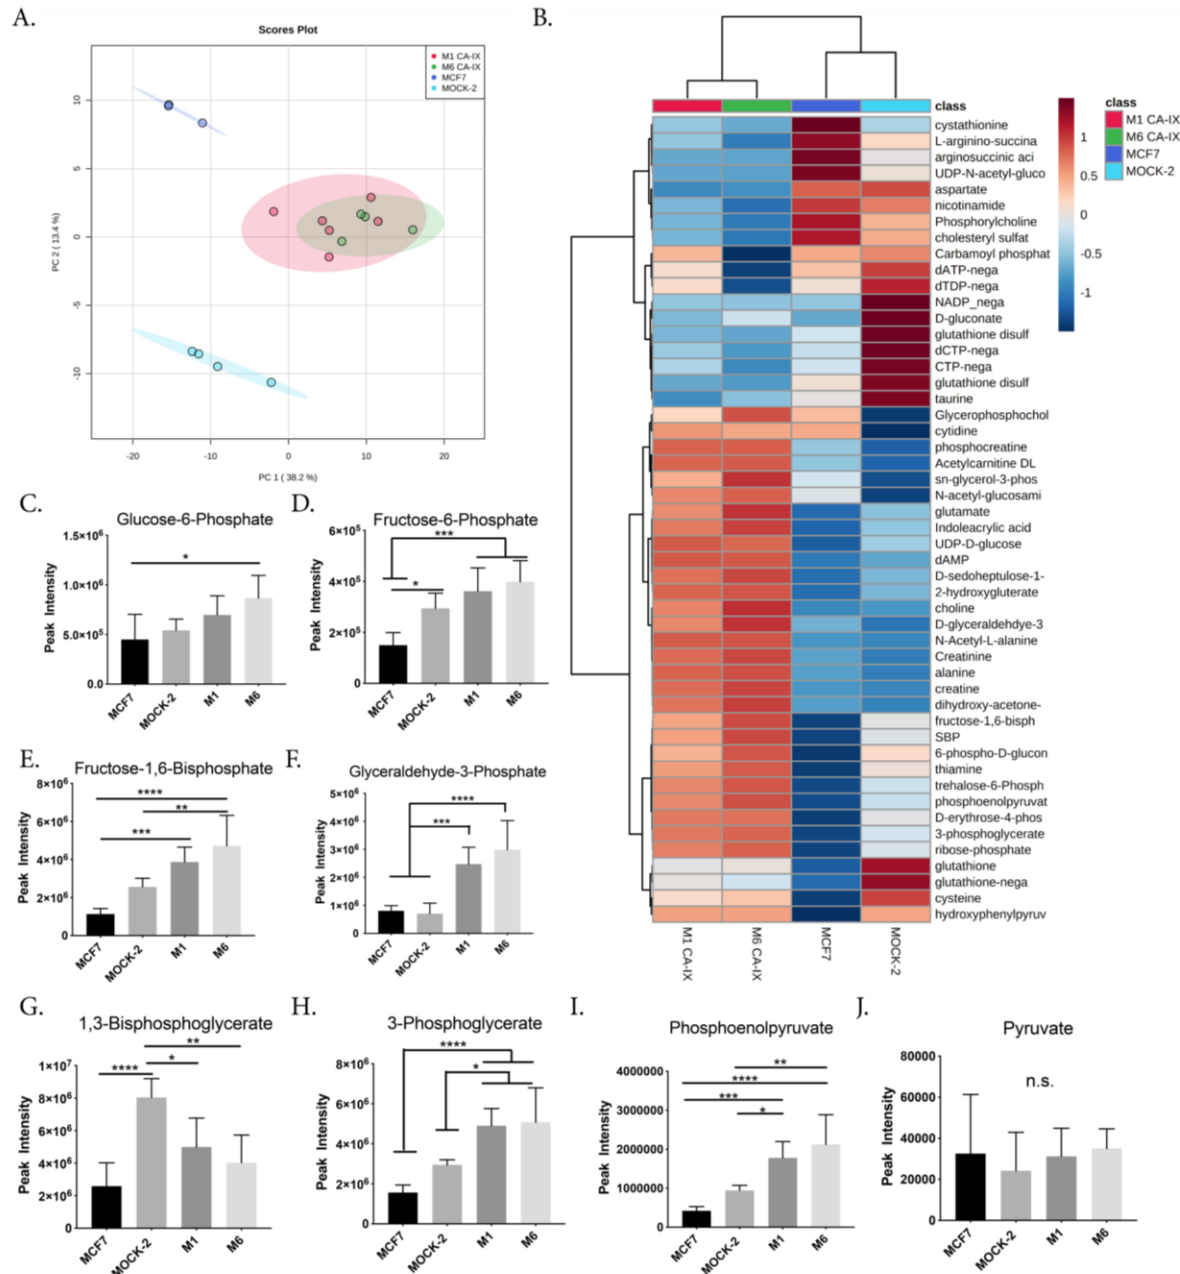

96

97 **Figure 2: Unlabeled metabolic profiling of CA-IX expressing MCF-7 cells intracellular metabolites and**  
 98 **analysis of the glycolytic metabolites** **A:** Principal component analysis of intracellular metabolites in CA-IX  
 99 expressing, MOCK-2, and Parental MCF-7 cells. **B:** Heatmap (hierarchical clustering) of the fifty most  
 100 significant fold changes of intracellular metabolites between CA-IX expressing clones, MOCK-2, and Parental  
 101 cells. Numerous glycolytic intermediates were significantly higher in CA-IX expressing cells compared to  
 102 MOCK-2 and Parental. **C-F:** Average peak intensity of each glycolytic intermediate in CA-IX expressing,  
 103 MOCK-2 and Parental MCF-7 Cells. N=5-6 biological replicates per group, statistical analysis using ordinary  
 104 one-way ANOVA. **G-J:** Average peak intensity of each glycolytic intermediate in CA-IX expressing, MOCK-  
 105 2 and Parental MCF-7 Cells. N=5-6 biological replicates per group, statistical analysis using ordinary one-way  
 106 ANOVA. \*p<0.05, \*\*p<0.01, \*\*\*p<0.001, \*\*\*\*p<0.0001



107 CA-IX over-expression increases pHi

108

109 Our metabolomics studies suggest multiple glycolytic enzymes were impacted, we  
110 therefore hypothesized that CA-IX expression might raise the intracellular pH of cells, which  
111 could pleiotropically increase glycolytic enzyme rates. Most glycolytic enzymes have ionizable  
112 residues that can alter their enzyme activity. Recently, these residues have been characterized for  
113 all glycolytic enzymes through homology modelling, which predicted glycolytic enzyme  
114 activities generally increase with pHi above neutral (Persi et al., 2018). We tested the PPR in  
115 MCF-7 parental cells after altering pHi in a range of pHe media 6.6-7.4, expecting that the PPR  
116 rate would increase with increasing pHi. Cells were incubated with either a chloride-containing  
117 solution or an iso-osmotic low-chloride formulation which replaced chloride salts with gluconate  
118 equivalents. Low-chloride solutions alter the driving force for Cl<sup>-</sup>/HCO<sub>3</sub><sup>-</sup> exchangers, effectively  
119 loading cells with HCO<sub>3</sub><sup>-</sup> ions and raising pHi at the same pHe (Sasaki and Yoshiyama, 1988;  
120 Wu et al., 2020). At all values of pHe from 6.6-7.2, cells in gluconate media exhibited  
121 significantly higher glycolytic rates compared to those in chloride-containing media (**Fig. 3A &**  
122 **Supplementary Fig. 8**), indicating that the increased glycolytic rate is strongly dependant on  
123 pHi.

124 CA-IX overexpression has been shown to increase pHi in other systems (Morgan et al.,  
125 2007), leading us to probe pHi in our CA-IX expressing cells. We used a pHi reporter dye,  
126 cSNARF1 to measure the effects of CA-IX expression on intracellular pH (pHi). A cSNARF1  
127 calibration curve was generated using nigericin/K<sup>+</sup> buffers (**Supplementary Fig. 9**). We then  
128 loaded MCF7 parental or the CA-IX expressing clones with cSNARF1 and used fluorescence  
129 imaging to measure pHi. MOCK-2 cells were unsuccessfully loaded with cSNARF1, possibly  
130 due to reduction or loss of esterase activity from the integration of the MOCK-2 plasmid into the  
131 MCF-7 DNA; therefore, they are not included in these analyses. We equilibrated the cells in  
132 media at pHe 6.6, 6.8, 7.1, and 7.4 and co-loaded them with cSNARF1 and nuclear dye Hoechst  
133 33342. The inclusion of a nuclear dye allowed post-processing to mask the nucleus, ensuring  
134 measurement of cytoplasmic pH only. At the intermediate pHe values of 6.8 and 7.1, the CA-IX  
135 expressing clones had significantly higher pHi compared to parental (**Fig. 3C, D &**  
136 **Supplementary Table 1**). The enzymatic activity of CA-IX is optimal at pH 6.8 and drops

137 precipitously as the pH is lowered to 6.0 (Li et al., 2011)(McIntyre et al., 2012). Consistent with  
138 this, at an acidic pHe of 6.4, we observed that the MCF7 parental cells had a higher intracellular  
139 pH compared to CA-IX clones (**Fig. 3B & Supplementary Table 1**), suggesting CA-IX  
140 enzymatic function was strongly reduced resulting in reduced CO<sub>2</sub> venting. There were no  
141 significant differences in pHi at pHe 7.4 (**Fig. 3E & Supplementary Table 1**). These data show  
142 that CA-IX expression can raise the pHi at intermediate pHe values and that thus increasing pHi  
143 likely results in increased glycolytic flux by globally enhancing glycolytic enzyme activity.  
144  
145

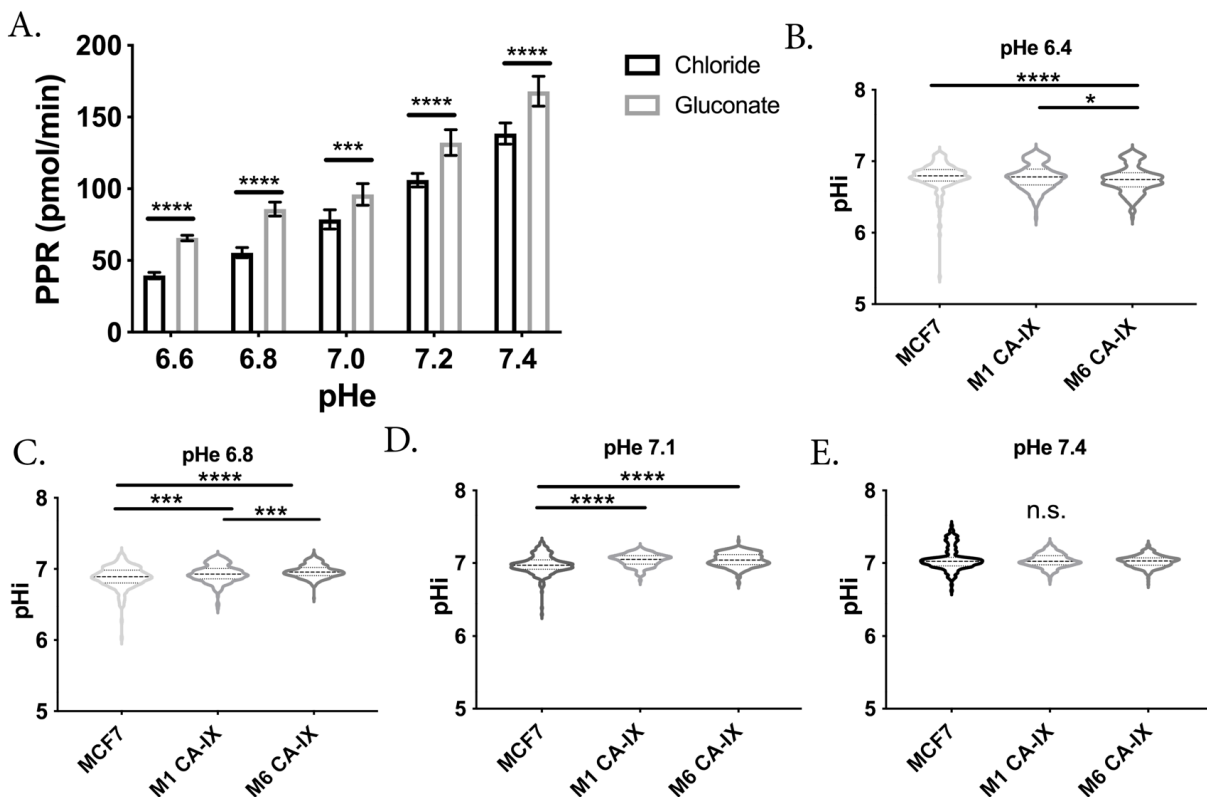

146  
147 **Figure 3: Increased intracellular pH enhances glycolysis in breast cancer cells.** A: Increased intracellular  
148 pH, using gluconate substituted media, increases the glycolytic rate in MCF7 cells irrespective of pHe. N=8 per  
149 group, statistical analysis using Welch's T-test; B-E: Intracellular pH as measured using cSNARF1 in varying  
150 extracellular pH, n=158-438 cells analyzed per group, statistical analysis using Kruskal-Wallis test. \*p<0.05,  
151 \*\*\*p<0.001, \*\*\*\*p<0.0001

152

153 CA-IX expression increases metastasis

154

155 We then investigated the effect of CA-IX expression on migration, invasion, and  
156 metastasis, as there are reported correlations between increased glycolytic flux, reduced  
157 extracellular pH, and metastasis (Birchmeier et al., 2003; Estrella et al., 2013; Hiraga et al.,  
158 2013; Kato et al., 2004). Additionally, CA-IX has been associated with increased invasion and  
159 metastasis in several systems (Swayampakula et al., 2017; Ward et al., 2015).

160 *In vitro*, we utilized scratch assays and gel escape to measure migration and invasion in  
161 the CA-IX clones. Scratch assays showed that clone M1 had increased migratory ability  
162 (**Supplementary Fig. 10**), closing the wound significantly more rapidly than controls. However,  
163 this was not observed in the M6 CA-IX clone. In the gel escape assay, expansion out of the gel  
164 is due to a combination of proliferation, invasion, and migration. Both CA-IX clones invaded  
165 the area surrounding the gel drop substantially quicker than the parental MCF-7 clone  
166 (**Supplementary Fig. 11**). Compared to the MOCK-2 cells, however, only the M6 clone was  
167 significantly more invasive. The apparent increased invasion rate by MOCK-2 compared to  
168 parental is likely due to their increased proliferation rate as correcting for proliferation eliminates  
169 the difference between MOCK-2 and parental (**Supplementary Fig. 7**). It is important to note  
170 that these assays were carried out at neutral pH and that the invasive behavior might be further  
171 enhanced by low pH, as we have shown previously for melanoma cells (Moellering et al., 2008).  
172 Together, these studies suggest that CA-IX expression can enhance cell motility, increasing  
173 migration and local invasion.

174 Furthermore, aggressive cancers with stem-like properties can resist anoikis, which can  
175 be measured *in vitro* by cells' ability to form spheroids independent of attachment to a basement  
176 membrane. Utilizing the hanging droplet technique, we observed that CA- IX expression enabled  
177 robust, compact spheroid formation, compared to the MOCK-2 and parental MCF-7 clones,  
178 which could not (**Supplementary Fig. 12**). This spheroid forming ability suggests CA-IX not  
179 only enhances cell:cell adhesion but also suggests that increased proton export can contribute to  
180 anoikis resistance when detached from the basement membrane.

181 Although the phenotype of our proton exporting CA-IX clones appeared to be more  
182 aggressive, this could be an *in vitro* only phenomenon. We thus investigated the clones *in vivo*.  
183 We studied the effect of CA-IX expression on primary tumor growth, as well as the ability of  
184 these clones to form both spontaneous (from the mammary fat pad) and experimental (tail vein

185 injected) metastasis. For primary and spontaneous metastasis models, MOCK-2, M1 or M6 CA-  
186 IX MCF-7 cells were implanted in the mammary fat pads of mice, and growth was monitored by  
187 caliper measurement. Although *in vitro*, mock cells proliferated faster (**Supplementary Fig. 7**),  
188 this was not observed *in vivo*, as the tumors from CA-IX expressing clones grew significantly  
189 faster. At all of the time points measured, primary tumor volume was significantly increased in  
190 the CA-IX expressing clones, compared to controls (**Fig. 4A & Supplementary Fig. 13**).  
191 Regression-based analysis determined the growth rate of tumors was significantly different  
192 between the groups,  $p < 0.0001$ . After resection, the primary tumors were sectioned, stained with  
193 H & E, and blindly graded by a board-certified pathologist (M.B.), who identified increased  
194 stromal invasion in the CA-IX expressing tumors (**Fig. 4B**). The mice were monitored for an  
195 additional 12 weeks post-resection, at which time the animals were sacrificed, and lungs stained  
196 for evidence of micro and macro metastases, scored blindly by a board-certified pathologist  
197 (M.B.). As shown in Table 1, 6/21 mice developed spontaneous metastasis from the M6 clone,  
198 whereas no spontaneous metastases were formed from the M1 clone and 1/10 were formed in the  
199 MOCK clones.

200 **Table 1: Effect of CA-IX expression on metastasis of MCF-7 cells. (Two-tailed Fisher's exact t-test**  
201  **$p < 0.05^*$ )**

| Mouse Model    | Experimental Metastasis  |             | Spontaneous Metastasis   |             |
|----------------|--------------------------|-------------|--------------------------|-------------|
|                | # of mice with lung mets | p-value     | # of mice with lung mets | p-value     |
| MCF7/Parental  | 0/5 (0%)                 |             |                          |             |
| MCF7/MOCK-2    | 0/6 (0%)                 |             | 1/10 (10%)               |             |
| MCF7/ CA-IX M1 | 4/7 (57%)                | 0.07 (n.s.) | 0/15 (0%)                |             |
| MCF7/ CA-IX M6 | 6/6 (100%)               | 0.0022 **   | 6/21 (29%)               | 0.37 (n.s.) |

202  
203 Because formation of spontaneous metastases is a multi-step, time-consuming, and  
204 complex process, we also investigated the ability of these clones to form experimental metastases  
205 following tail-vein injection, which only involves the final steps of extravasation and

206 colonization. Metastases to the lung were scored blindly by a board-certified pathologist (M.B.),  
207 who observed that neither of the control groups developed metastases, and that both CA-IX  
208 clones had significant macrometastases (**Table 1**). Consistent with the spontaneous model, the  
209 M1 formed fewer metastases compared to the M6, however both CA-IX clones exhibited gross  
210 metastasis to the lungs (**Fig. 4C**), which were confirmed histologically (**Fig. 4D**). The resulting  
211 macrometastases significantly reduced overall survival of the mice (**Fig. 4E**). Additional IHC  
212 staining confirmed the lung metastasis expressed both CA-IX and human estrogen receptor,  
213 which we used as a marker for MCF7 cells (**Fig. 4F**).

214         Prior studies have shown that neutralization of acidity using oral buffers inhibits  
215 metastasis (Ibrahim-Hashim et al., 2017; Ibrahim-Hashim et al., 2012). As we hypothesized that  
216 our M6 CA-IX clones were metastatic by virtue of increased acid production (**Fig. 1D, E**), we  
217 asked whether buffer therapy would reduce the metastatic burden. Using the experimental  
218 metastasis model, we compared untreated to buffer-treated M6 or MOCK-2 mice. As in the first  
219 experimental metastasis study, all mice injected with M6 developed macrometastases, and these  
220 were significantly reduced by bicarbonate (**Fig. 4G & H**). Two out of ten MOCK-2 mice  
221 developed very small micrometastasis, and no metastases were found in the buffer therapy  
222 MOCK-2 group (**Fig. 4G**).

223

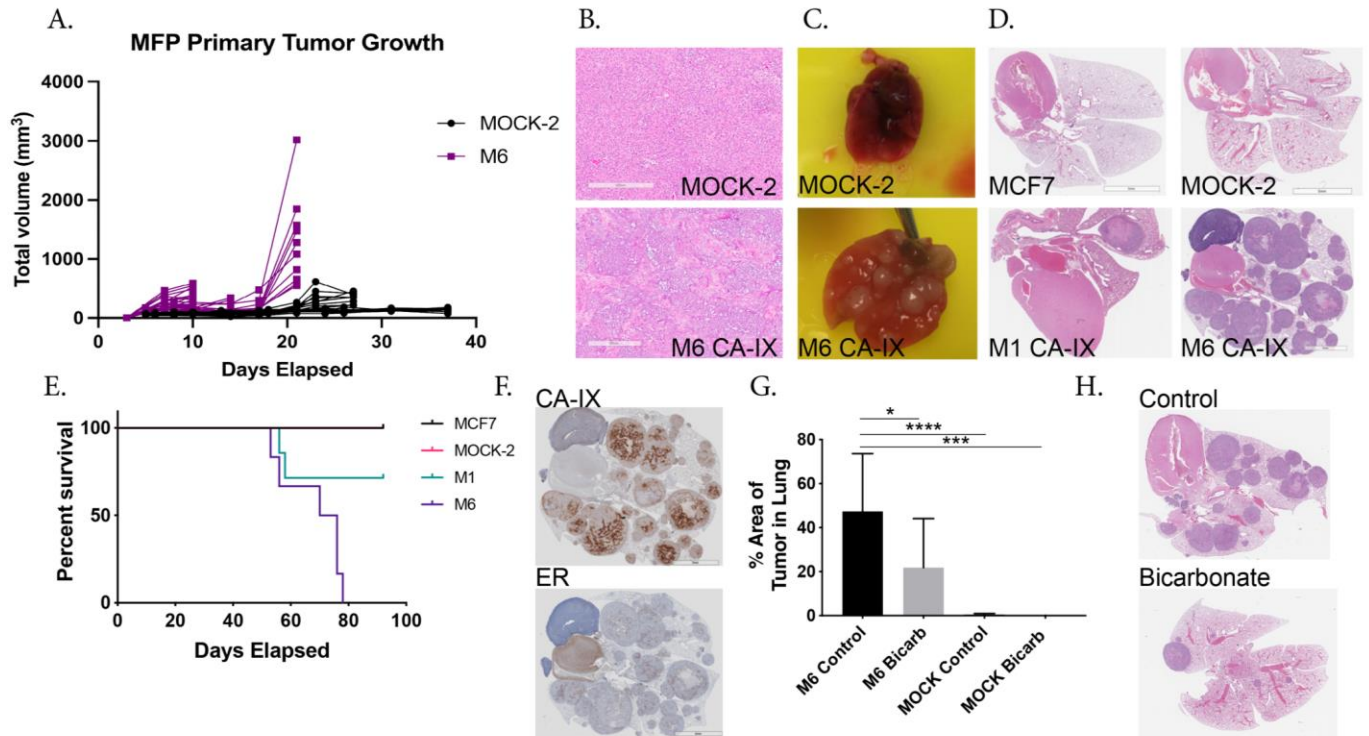

224

225

226 **Figure 4: *In vivo* studies of CA-IX expressing cells and the effect on tumor growth, metastasis, and buffer**

227 **therapy** **A:** Primary tumor volume of control or CA-IX cells implanted in the mammary fat pad, n=10 mice per

228 group, statistical analysis using Welch's T-test. Statistical analysis of the tumor volume was carried out to

229 determine if tumor growth rate was different between the Mock-2 and M6 groups. Linear regression analysis

230 showed the differences between the slopes were extremely significant.  $F = 21.03$ .  $DFn = 1$ ,  $DFd = 116$ ,  $P < 0.0001$

231 **B:** Representative H&E staining of resected primary tumors. M6 CA-IX group showed high infiltration of

232 stromal cells compared to MOCK-2. **C:** Representative whole lung images from MOCK-2 and M6 experimental

233 metastasis model showing the extent of metastasis visible. **D:** Representative immunohistochemistry of H&E

234 staining in the lungs of the experimental metastasis groups, showing gross metastasis of the lungs. **E:** Kaplan-

235 Meier Survival curve of experimental metastasis study in SCID beige mice, 90-day endpoint after tail vein

236 injection of cells. Log-rank test performed  $p = 0.0062$ ,  $df = 3$ .  $N = 5$ (MCF-7),  $6$ (MOCK-2),  $7$ (M1),  $7$ (M6) mice. **F:**

237 Representative immunohistochemistry of M6 lungs with antibodies towards CA-IX and ER, to confirm the

238 generated M6 clone were the cells forming tumors in the lungs. MCF-7 cells are ER-positive. **G:** Effect of buffer

239 therapy on experimental metastasis of CA-IX clone M6 and MOCK-2 cells in SCID beige mice and the % of

240 tumor burden in the lungs, 77days after IV injection of cells. Data are shown as average %  $\pm$  SD,  $N = 6$ (M6),

241  $9$ (M6 Bicarb),  $9$ (MOCK-2),  $7$ (MOCK-2 Bicarb) mice, statistical analysis using ordinary one-way ANOVA. **H:**

242 Immunohistochemistry of H&E staining in the lungs of the M6 control and bicarb treated experimental

243 metastasis study groups, showing gross metastasis of the lungs. \* $p < 0.05$ , \*\* $p < 0.01$ , \*\*\* $p < 0.001$ , \*\*\*\* $p < 0.0001$

244 *Over-expression of yeast proton pump PMA1 increases motility and metabolism*

245 While we hypothesize that CA-IX is acting as a proton equivalent exporting system, there

246 are many other activities of this protein, including non-enzymatic activities, that could be

247 activating glycolysis and promoting metastasis. To test whether the observed effects on

248 glycolysis could be due to increased proton export, we utilized another model, PMA1, which  
249 electrogenically pumps H<sup>+</sup> out of cells at the expense of ATP (Ferreira et al., 2001). Prior work  
250 has shown ectopic expression of PMA1 in murine 3T3 fibroblasts led to tumorigenesis (Perona  
251 and Serrano, 1988) and to increased aerobic glycolysis with elevated intracellular pH (Gillies,  
252 1990; Martinez et al., 1994). We engineered MCF-7 cells to express PMA1 and selected two  
253 clones following zeocin selection (PMA1-C1 and PMA1-C5) as well as an empty vector  
254 transfected control (MOCK-1). PMA1 over-expression in C1 and C5 was confirmed, by qRT-  
255 PCR (**Supplementary Fig. 14**) and western blot (**Fig. 5A**). Moreover, using  
256 immunocytochemistry of non-permeabilized cells (**Fig. 5B & Supplementary Fig. 15**) or  
257 permeabilized cells (**Supplementary Fig. 16**), we verified PMA1 protein expression on the  
258 plasma membrane and in the cytoplasm of both PMA1 clones.  
259

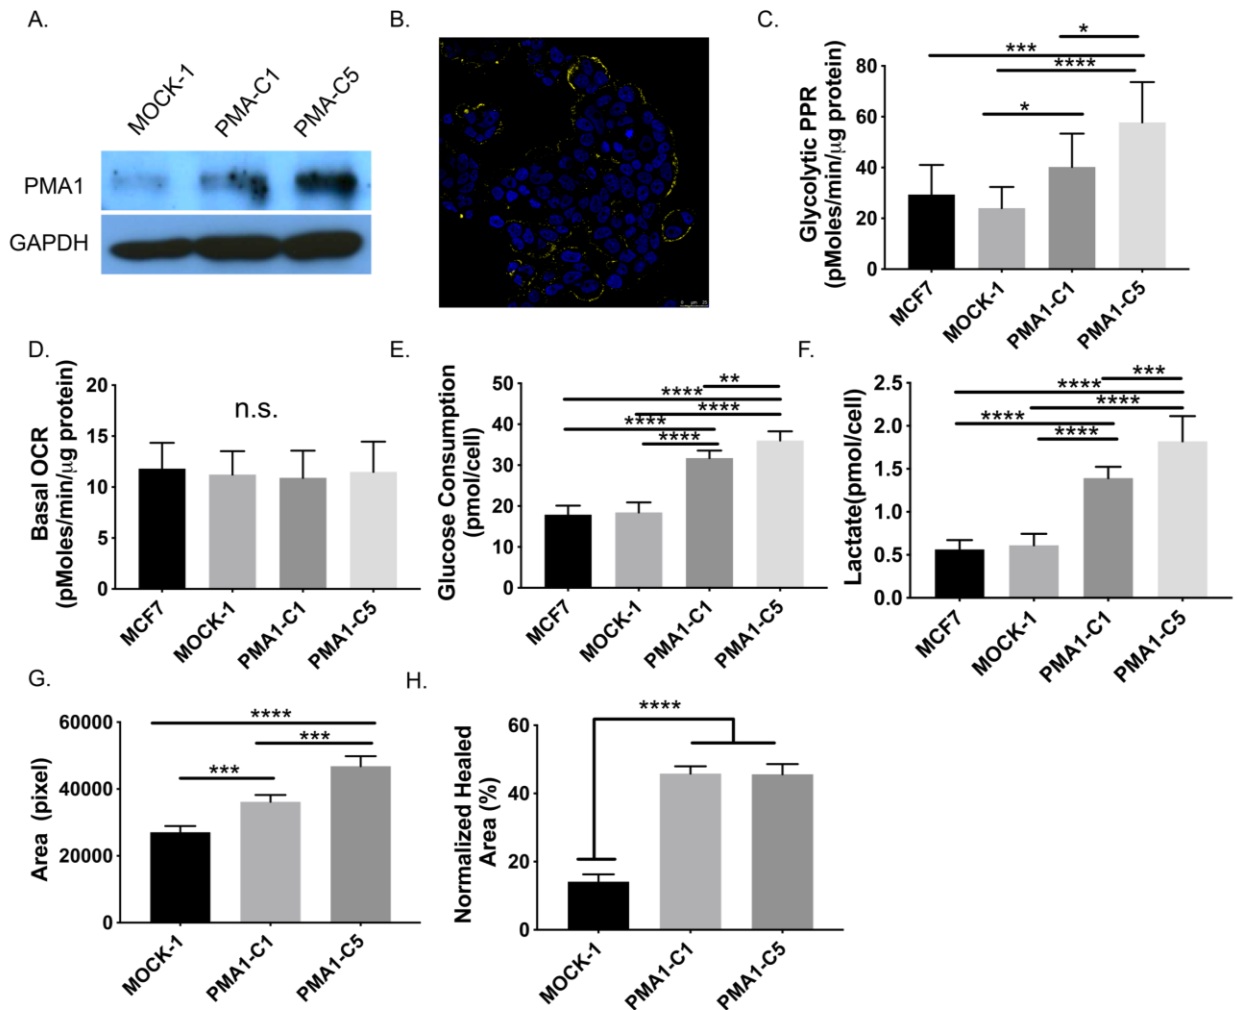

260  
 261 **Figure 5: Over-expression of yeast ATPase proton pump, PMA1, in MCF-7 breast cancer cells**  
 262 **increases glycolytic metabolism, migration, and invasion in vitro** A: Immunoblotting of protein lysates from  
 263 MCF-7 cells transfected with empty vector (MOCK-1) or PMA1 vector (C1 and C5). Proteins from total cell  
 264 extracts were immunoblotted for PMA1 and GAPDH (loading control). B: Representative  
 265 immunocytochemistry image of PMA1 expression (yellow), overlaid with DAPI nuclear stain (blue), in PMA1-  
 266 C5 non-permeabilized MCF-7 cells. PMA1 clones exhibit PMA1 staining, whereas MOCK-1 cells do not. C:  
 267 Seahorse extracellular flux analysis of glycolysis associated proton production rate, measured after glucose is  
 268 added, in MCF-7 parental, MOCK-1, PMA-C1, and PMA1-C5 MCF-7 cells. Data shown as mean ± SD n=9  
 269 biological replicates. Statistical analysis using ordinary one-way ANOVA. D: Seahorse extracellular flux  
 270 analysis of basal oxygen consumption in the presence of glucose for MCF-7 parental, MOCK-1, PMA-C1, and  
 271 PMA1-C5 MCF-7 cells. Data shown as mean ± SD n=20 biological replicates. Statistical analysis using ordinary  
 272 one-way ANOVA. E: Glucose concentration in tumor-conditioned media collected after culturing to confluence  
 273 from MCF-7 parental, MOCK-1, PMA-C1 and PMA1-C5 MCF-7 cells for 24hrs, measured using hexokinase  
 274 activity assay. Data shown as mean ± SD n=9 biological replicates. Statistical analysis using ordinary one-way  
 275 ANOVA. F: Lactate concentration in tumor-conditioned media collected after culturing to confluence from  
 276 MCF-7 parental, MOCK-1, PMA-C1 and PMA1-C5 MCF-7 cells for 24hrs, measured using fluorescent lactate  
 277 assay. Data shown as mean ± SD n=9 biological replicates. Statistical analysis using ordinary one-way ANOVA.  
 278 G: Gel escape assay to measure migration and invasion in MOCK-1, PMA-C1 and PMA1-C5 MCF-7 cells. Cells  
 279 are embedded in a Matrigel droplet without serum, and they are surrounded by media containing serum. Droplets



280 are monitored over one week for cell invasion out of the droplet and the area measured is normalized to cellular  
281 proliferation rates. N=4 biological replicates. Statistical analysis using ordinary one-way ANOVA. H. Circular  
282 wound healing assay of MOCK-1, PMA-C1 and PMA1-C5 MCF-7 cells. A circular wound is created with a  
283 rubber stopper and then cells are monitored migrating into the area to close the wound. The area healed is  
284 quantified in % relative to starting area and normalized to the cellular proliferation rate. N=4 biological  
285 replicates. Statistical analysis using ordinary one-way ANOVA. \* $p < 0.05$ , \*\* $p < 0.01$ , \*\*\* $p < 0.001$ , \*\*\*\* $p < 0.0001$

286  
287 To characterize the metabolic activity of PMA1 transfectants, we again utilized the  
288 glycolysis and mitochondrial stress tests (GST and MST, respectively) of the Seahorse (XFe)  
289 Analyzer. The glucose-induced PPR (**Fig. 5C**), and the glycolytic reserve (**Supplementary Fig.**  
290 **17**) were significantly higher in the PMA1 clones compared to empty vector MOCK-1 or  
291 parental clones, suggesting functional activities of the transfected pump. In contrast to the CA-IX  
292 transfectants, there were no significant differences in oxygen consumption rates (OCR) between  
293 PMA1 clones and controls (**Fig. 5D**). This could be due to increased energy demand from the  
294 ATPase proton pump. We further confirmed these metabolic alterations by measuring glycolytic  
295 flux. PMA1 clones had significantly higher glucose consumption rates (**Fig. 5E**) and lactate  
296 production rates (**Fig. 5F**) compared to MOCK-1 or parental MCF-7 clones. These data, together  
297 with the CA-IX results, indicate that acid export can drive cells to exhibit a Warburg phenotype.

298 As with the CA-IX transfectants, we also measured invasion and migration using gel  
299 escape and circular wound healing assays, respectively. Compared to the MOCK-1 cells, both  
300 PMA1 clones expanded significantly more out of the gel drop (**Fig. 5G & Supplementary Fig.**  
301 **18**). In the circular "wound-healing" assay, we monitored the migration of cells into a cell-free  
302 area. Again, compared to MOCK-1, both PMA1 clones had increased migration rates (**Fig. 5H &**  
303 **Supplementary Fig. 19**). Together, these results indicate that cellular invasion and migration  
304 were significantly enhanced by PMA1 expression and acid production.

305  
306 *PMA1 induces a metastatic phenotype in vivo and alters the expression of proteins involved in*  
307 *metabolism and pH regulation*

308  
309 To investigate if proton export enhanced aggressiveness, as seen in the CA-IX model, we  
310 measured the PMA1 cells' metastatic ability *in vivo* in both spontaneous and experimental  
311 metastasis models. In our *in vitro* studies, the proliferation rates of PMA1-C1 and the empty  
312 vector MOCK-1 clones were similar, whereas the growth rate of PMA-C5 was significantly

313 slower (**Supplementary Fig. 20**). Hence, we omitted PMA-C5 in our *in vivo* studies to reduce  
314 the possibility of proliferation being a confounding variable. In both the spontaneous and tail  
315 vein metastases models, only 1 of 10 mice in each MOCK-1 group developed lung metastases. In  
316 contrast, 7 of 12 PMA-C1 mice developed lung metastases following tail vein injection and 4 of  
317 9 formed spontaneous metastases (**Supplementary Table 2**).

318  
319 Lung metastases of PMA1 cells, visualized by H&E staining (**Fig. 6A**), were further  
320 validated by immunohistochemistry (IHC) of PMA1 (**Fig. 6A**) and RNA analysis of FFPE lung  
321 tissue for PMA1 gene expression (**Supplementary Fig. 21**). Notably, primary tumors revealed  
322 no significant growth differences between PMA1 and MOCK-1 tumors (**Fig. 6B**) or final tumor  
323 volume (**Fig. 6C**). However, blind grading (1 to 4+) of H&E-stained tumor sections by a board-  
324 certified pathologist (A.L.) indicated that PMA1 primary tumors were of significantly higher  
325 grade compared to MOCK-1 controls ( $p=0.016$ ). The average grade was  $2.7 \pm 0.52$  for MOCK-1  
326 compared with  $3.4 \pm 0.67$  for the PMA1 primary tumors (**Fig. 6D and 6E**). Maintenance of  
327 PMA1 expression *in vivo* was confirmed with quantitative IHC of the resected primary tumors,  
328 demonstrating a significant difference in PMA1 protein expression between the MOCK-1 ( $19\% \pm$   
329  $3.0$ ,  $n = 10$ ) and PMA-C1 ( $90\% \pm 2.5$ ,  $n = 9$ ) tumors (**Fig. 6F & 6I**).

330

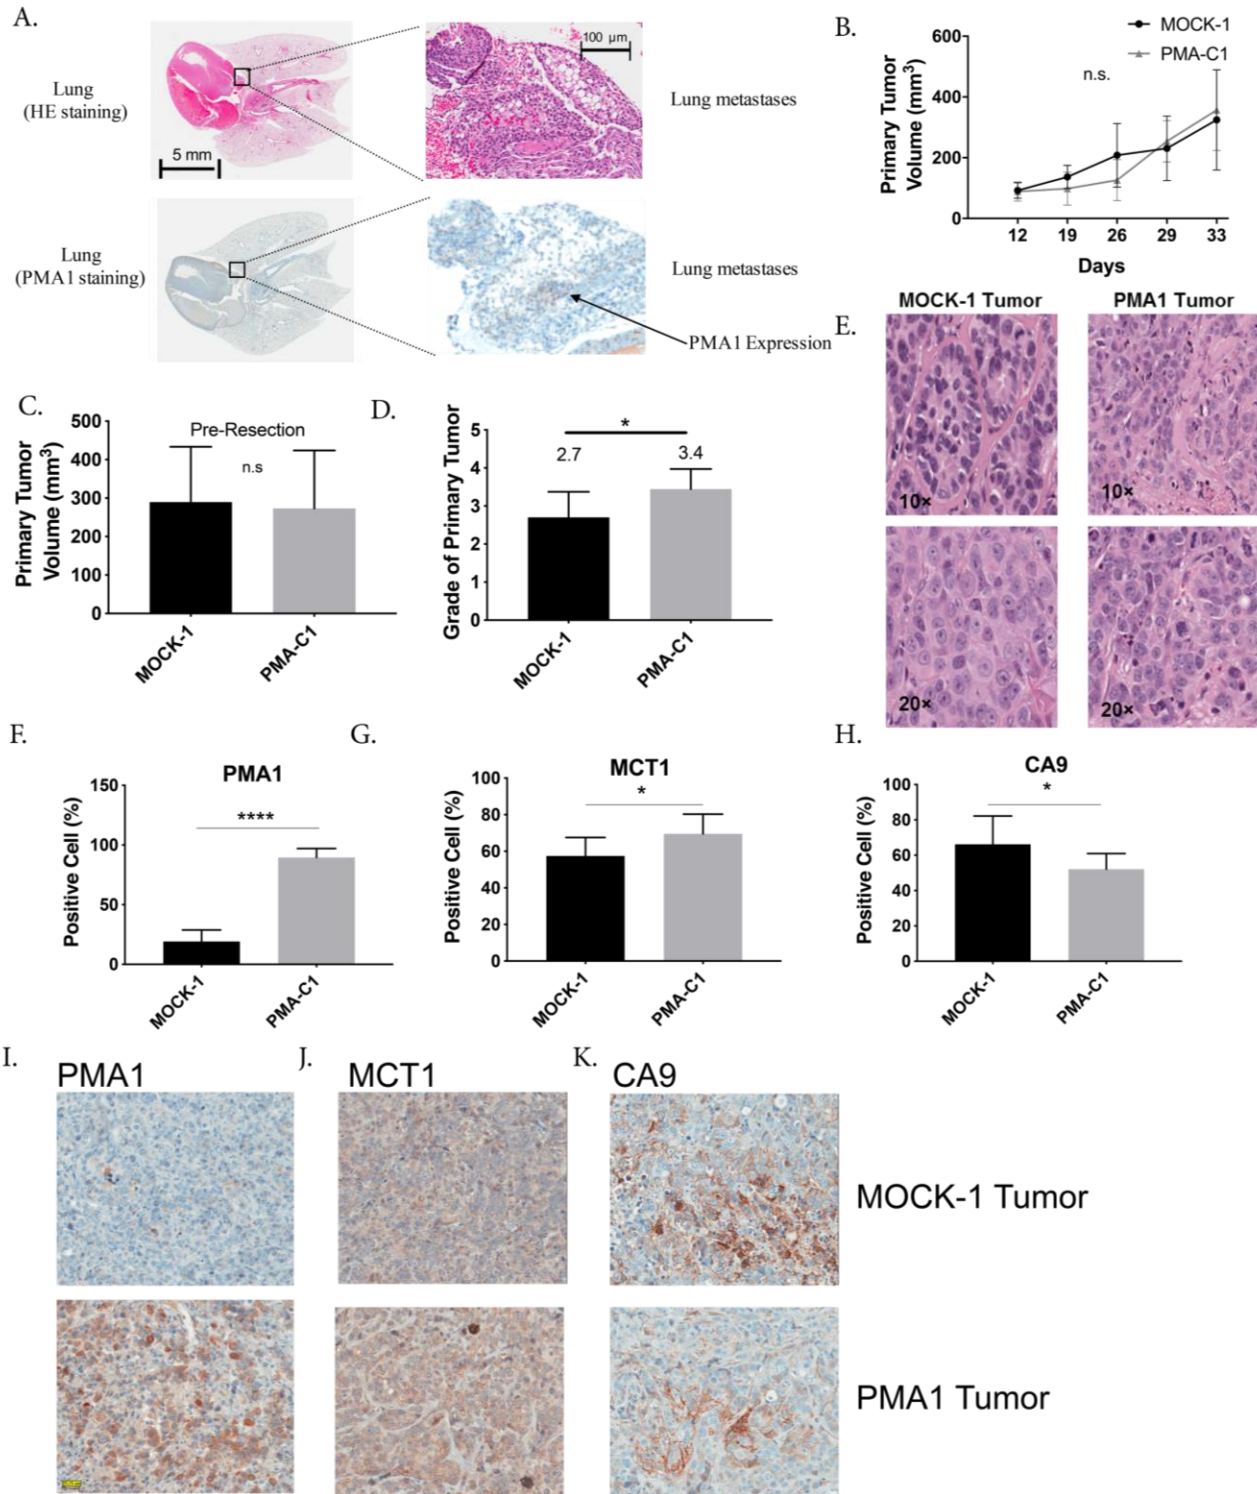

331  
332

333 **Figure 6: *In vivo* studies of PMA1 expressing cells and the effect on tumor growth, metastasis, and**  
334 **expression of metabolic markers. A:** Representative lung images (5mm and 100 $\mu$ m) from the experimental  
335 metastasis study in SCID beige mice, whereby MOCK-1 or PMA-C1 cells were injected via the tail vein and

336 allowed to grow for 3 months. At the endpoint lungs were resected and sections were stained with H & E to look  
337 for metastases and PMA1 to confirm expression in the PMA C1 metastases. **B:** Primary tumor growth rate in  
338 SCID beige mice of MOCK-1 or PMA1-C1 cell lines, injected subcutaneously. Data are shown as mean  $\pm$  SD  
339 over time, N=7(MOCK-1) N=6 (PMA1-C1). **C:** Quantification of primary tumor volume, MOCK-1 or PMA1-  
340 C1, resected after 33 days of growth in SCID beige mice. Tumors were resected to allow for spontaneous  
341 metastasis studies to continue. Data are shown as mean  $\pm$  SD, N=9 (MOCK-1) and N=9 (PMA1), statistical  
342 analysis using Unpaired t-test with Welch's correction. **D:** Histological grade of MOCK-1 and PMA1 tumors.  
343 Data are shown as mean  $\pm$  SD, N=10 (MOCK-1) and N=9 (PMA1), statistical analysis using Unpaired t-test  
344 with Welch's correction. **E:** Representative images of H & E staining in MOCK-1 and PMA1 primary tumors  
345 were used to score histological grade. **F:** Quantification of immunohistochemistry staining for PMA1 protein in  
346 FFPE sections of resected primary tumors, MOCK-1 and PMA1-C1. Data are shown as mean  $\pm$  SD, N=10  
347 (MOCK-1) and N=9 (PMA1), statistical analysis using Unpaired t-test. **G:** Quantification of  
348 immunohistochemistry staining for MCT1 protein in FFPE sections of resected primary tumors, MOCK-1 and  
349 PMA1-C1. Data are shown as mean  $\pm$  SD, N=10 (MOCK-1) and N=9 (PMA1), statistical analysis using  
350 Unpaired t-test with Welch's correction. **H:** Quantification of immunohistochemistry staining for CA- IX protein  
351 in FFPE sections of resected primary tumors, MOCK-1 and PMA1-C1. Data are shown as mean  $\pm$  SD, N=10  
352 (MOCK-1) and N=9 (PMA1), statistical analysis using Unpaired t-test. **F:** Immunohistochemistry representative  
353 images of PMA1 and MOCK-1 primary tumors stained for PMA1 protein expression. **I:** Representative  
354 immunohistochemistry images of FFPE sections of resected primary tumors, MOCK-1 and PMA1-C1 stained  
355 with antibody for MCT1. **K:** Representative immunohistochemistry images of FFPE sections of resected  
356 primary tumors, MOCK-1 and PMA1-C1, stained with antibody for CA-IX. \*p<0.05, \*\*p<0.01, \*\*\*p<0.001,  
357 \*\*\*\*p<0.0001

358

359 Additional IHC of PMA1 tumors showed that they had significantly lower CA-IX  
360 expression than MOCK-1 (**Fig. 6H & 6K**). As CA-IX plays a vital role in regulating tumor pH  
361 (Doherty et al., 2014; Lee et al., 2018; Swietach et al., 2009), we postulate that its activity may  
362 have been made redundant by PMA1. PMA1 expressing tumors also had higher levels of the  
363 monocarboxylate (lactate) transporter, MCT1 (**Fig. 6G & 6J**), which has been associated with  
364 increased aggressiveness in breast cancer (Doherty et al., 2014). Notably, other proteins, such as  
365 glucose transporter 1, GLUT1 (**Supplementary Fig. 22**), the sodium hydrogen exchanger 1,  
366 NHE1 (**Supplementary Fig. 23**), and MCT4 (**Supplementary Fig. 24**) showed no differences  
367 between the PMA1 and MOCK-1 groups. These data suggest that the increased glycolytic flux,  
368 which requires glucose uptake by GLUT1, can be accommodated by native protein levels of  
369 GLUT1 (i.e., it is not rate-limiting).

370

## DISCUSSION

The primary goal of this study was to determine if acid export *per se* could drive aerobic glycolysis, the “Warburg Effect”, in cancer. Aerobic glycolysis, a cancer hallmark, is often associated with more aggressive tumors. Numerous studies have attempted to determine why tumors favor fermentative glycolysis, even in the presence of sufficient oxygen (Gatenby and Gillies, 2004a; Vander Heiden et al., 2009). Aerobic glycolysis is bioenergetically inefficient, producing only 2 ATP per glucose, compared to 36 ATP upon complete oxidation. Thus, it is not obvious why this should be such a prevalent phenotype. It is axiomatic that common phenotypes *must* confer a selective advantage, yet the evolutionary drivers of aerobic glycolysis are not clear. Theories proposed include glucose addiction (Buzzai et al., 2005), dysfunctional mitochondria (Shiratori et al., 2019), which is not the case in most cancers, and to meet the rapid energetic requirements of membrane transporters (Epstein et al., 2014). Another theory is that glycolysis enhances tumor cell proliferation by generating the anabolic building blocks for macromolecules. However, most of the glucose-derived carbons are exported out of the cell as lactate (Lunt and Vander Heiden, 2011). Moreover, TCA cycle intermediates are considered more important for lipid, amino acid, and nucleotide synthesis, compared to glycolytic intermediates (Carracedo et al., 2013; Wellen and Thompson, 2012). However, none of these theories clearly demonstrate why so many cancers favor aerobic glycolysis. We hypothesize that acid export *per se* and extracellular acidification provides a distinct selective advantage, and that it is enabled by increased glucose fermentation. This theory was first proposed as the “acid mediated invasion hypothesis” (Gatenby et al., 2006a) and has been subsequently elaborated (Gillies et al., 2008).

To test the hypothesis that acid export increases glycolysis in cancer, we over-expressed a proton exporter, CA-IX, in an OXPHOS dominant cell line, MCF-7. In MCF-7 cells, CA-IX is not expressed under normoxic conditions, and over-expression resulted in cells that more rapidly exported acid and up-regulated glycolysis. Both glucose consumption and lactate production rates increased. Other studies have shown that CA-IX over-expression can increase lactate production, albeit under hypoxic conditions (Jamali et al., 2015). As glycolysis was specifically

increased, we investigated the mechanisms whereby acid export could be causing this shift in metabolism. We broadly interrogated cellular metabolism using a targeted metabolomics panel and found that the most significantly altered metabolites in the CA-IX expressing clones were glycolytic intermediates. Specifically, all glycolytic intermediates upstream of pyruvate kinase were increased. Enzyme activity can be affected by pH, including those in the glycolytic pathway, and are most active at the pH of their subcellular compartment from acidic lysosomes to alkaline mitochondria (Persi et al., 2018). For glycolytic enzymes, pH optima are slightly on the alkaline side of neutral (7.2-7.4), meaning that raising pH above neutrality will globally increase activities of glycolytic enzymes. Because the data suggested pleiotropic increases in enzyme activity, we measured intracellular pH using fluorescence ratio imaging in our CA-IX expressing clones. These clones, had a higher pHi in biologically relevant extracellular pH conditions, compared to the parental. Specifically, at pHe 6.8 and 7.2, at which CA-IX can function as a proton equivalent exporter, the CA-IX clones had increased pHi compared to parental. One caveat of this experiment was that the MOCK cells were unquantifiable as they did not accumulate SNARF-1, possibly due to increased activity of multidrug resistance transporters. In addition, the experiments in low-chloride directly implicate increased pHi in regulating aerobic glycolytic flux. These data indicate loading cells with  $\text{HCO}_3^-$  ions raises the intracellular pH sufficiently to enhance enzyme activity and result in increased glycolytic flux.

We tested our hypothesis using two more models and another acid exporting protein to minimize cell line and protein-specific effects. Similar to the MCF-7 results, over-expression of CA-IX in U2-OS and HEK293 cells increased glycolysis compared to controls. Although parental HEK293 cells are more glycolytic than the other cell lines chosen, over-expression of CA-IX still enhanced glycolysis. We tested another acid exporting protein, PMA-1, which has an unequivocal activity of exporting protons at the expense of ATP. PMA-1 over-expression in MCF-7 cells similarly resulted in increased glycolysis, as measured by increased glucose uptake and lactate production. These findings, together with our CA-IX results, suggest that expression of proton exporting activity can up-regulate aerobic glycolysis, likely through a global increase of intracellular pH. Notably, while the CA-IX transfectants had reduced oxygen consumption, this was not observed in the PMA1 cells. The cause of this difference is not known and may reflect differences in the bioenergetic requirements for the two transporting systems.

371 We hypothesize that acid export-driven glycolysis would make them more aggressive, as  
372 measured *in vitro* with motility and invasion assays, and *in vivo* with experimental and  
373 spontaneous metastases studies. Glycolysis and acidity have been correlated with poor prognosis  
374 and metastasis (Walenta et al., 2000; Webb et al., 2011a). Our focus on CA-IX as an acid  
375 exporter was due to its clinical relevance in many cancer types, such as breast, ovarian, and  
376 astrocytoma, where CA-IX over-expression correlates with poor prognosis, reduced survival, and  
377 reduced metastasis-free survival. This suggests CA-IX specifically and perhaps acid export  
378 generally enhances cancer aggressiveness and subsequently metastasis. In our models, *in vitro*  
379 acid export driven by CA-IX or PMA1 was linked to enhanced migration and invasion *in vitro*,  
380 which is consistent with prior studies (Csaderova et al., 2013; Shin et al., 2011; Svastova et al.,  
381 2012). *In vivo*, cells at the invasive edge tumor periphery are known to be more acidic and  
382 express CA-IX (Lloyd et al., 2016; Rohani et al., 2019). CA-IX has also been shown to enhance  
383 matrix metalloproteinase activity, in particular MMP-14 which is active at an acidic pH,  
384 resulting in stromal degradation that aids cancer migration into the periphery (Swayampakula et  
385 al., 2017).

386 Our encouraging *in vitro* results led us to take these models, CA-IX and PMA-1, *in vivo*.  
387 We found that aggression and metastasis were higher in both PMA-1 and CA-IX transfectants.  
388 Primary tumor growth was enhanced in the CA-IX model compared to controls. In the PMA-1  
389 model, a pathologist blindly scored the primary tumors a higher grade compared to control  
390 tumors. However, spontaneous metastasis after primary tumor resection was not significantly  
391 increased in PMA-1 or CA-IX transfectants compared to controls (**Table 1 & Supplementary**  
392 **Table 2**). It is notable, however, that in our spontaneous models 10/45 mice with PMA-1 or CA-  
393 IX clones had metastases, compared to 2/20 control mice with parental or MOCK-transfections.  
394 In contrast, our experimental metastasis model, which skips the intravasation step, showed  
395 enhanced experimental metastasis in both models, with 17/25 mice in PMA-1 or CA-IX  
396 transfectants developing metastasis, compared to 1/21 metastases in control mice (**Table 1 &**  
397 **Supplementary Table 2**). We did not quantify the number or size of metastatic lesions, because  
398 the important metric is binary: i.e. whether or not these clones were able to metastasize at all. A  
399 related study in 4T1 breast cancer showed that inhibiting CA-IX reduced tumor growth and  
400 experimental metastasis (Lou et al., 2011). However, inhibition is different than induction, and

401 4T1 are highly glycolytic and acidic to begin with. However, this study does indicate the  
402 importance of acid export and its role in enhancing tumor growth. Due to the robust enhanced  
403 metastasis formation in the experimental metastasis studies, it indicates that acid export can  
404 facilitate tumor cell extravasation out of the blood vessels and colonization of metastatic sites.

405 In our CA-IX model buffer therapy significantly reduced tumor burden in the lungs  
406 compared to their untreated counterparts. Although this did not completely prevent metastasis,  
407 combinations of buffer therapy with specific acid exporter inhibitors may be necessary. CA-IX is  
408 minimally expressed in normal tissue and could be a viable therapeutic target (Silvia Pastorekova  
409 et al., 1997) and other proton pump inhibitors are currently in clinical trials (Fais, 2015). Many  
410 studies have hinted at the importance of acidity, and many have proposed reasons as to why  
411 cancer cells favor aerobic glycolysis, but few have proposed that acidity is the driver. This study  
412 represents the first to test whether acid export can increase aerobic glycolysis and enhance cancer  
413 aggressiveness, rather than acid merely being a by-product.

## 414 **Materials and Methods**

### 415 Construction of stable cell lines

416 Plasmids. Yeast plasma membrane ATPase 1 (PMA1) cDNA construct was designed based on  
417 the sequence (Accession Number: NM\_001180873; *Saccharomyces cerevisiae* S288c PMA1).  
418 The codons were optimized for the suitable expression in mammalian cells and restriction  
419 enzyme sequences Hind III and Xho I were inserted at the 5' and 3' ends of the full-length  
420 sequence, respectively. The fully designed DNA sequence was commercially synthesized (Blue  
421 Heron Biotechnology, Bothell, WA, 98021). This was cloned into pcDNA3.1/Zeo (+) vector in  
422 which PMA1 gene expression was driven under the CMV promoter. The sequence of the  
423 pcDNA/PMA1 construct and the identity of the parental cell line were confirmed by the  
424 molecular genomics core facility (Moffitt Research Institute, Tampa, FL). Carbonic anhydrase 9  
425 (CA9) construct was designed by Origene based on the sequence (Accession  
426 Number: NM\_001216 ; *Homo sapiens*) and cloned into a pCMV6 vector (PS10001, Origene,  
427 MD) to form pCMV6/CA-IX vectors (CQ10630, RC204839 subclone, Origene, MD) in which  
428 CA9 gene expression was driven under the CMV promoter.



429 Cell lines. The MCF-7 cells and HEK 293 cells as transfection host cell lines were acquired  
430 from American Type Culture Collection (ATCC HTB-22, Manassas, VA) and maintained in  
431 RPMI media 1640 (Life Technologies Gibco®, 11875-093) supplemented with 10% FBS  
432 (Hyclone Laboratories, UT) under standard cell culture conditions. The U2-OS cell line was a  
433 gift from Jillaina Menth, Moffitt Cancer Centre Translational Research Core, and maintained in  
434 RPMI media 1640 (Life Technologies Gibco®, 11875-093) supplemented with 10% FBS  
435 (Hyclone Laboratories, UT) under standard cell culture conditions. The MCF-7 cells were  
436 transfected with empty pcDNA, pcDNA/PMA1, pCMV6 (PS10001, Origene, MD) and  
437 pCMV6/CA-IX vectors (CQ10630, RC204839 subclone, Origene, MD) respectively, resulted in  
438 MCF-7/MOCK-1 cells, MCF-7/PMA1, MCF-7/MOCK-2, and MCF-7/CA-IX cell lines by  
439 standard clonogenic stable cell construction procedures using Fugene HD (Promega, E 2311).  
440 The U2-OS and HEK-293 cells transfected with empty pCMV6 (PS10001, Origene, MD) and  
441 pCMV6/CA-IX vectors (CQ10630, RC204839 subclone, Origene, MD) respectively, resulted in  
442 U2-OS/MOCK-2, HEK/MOCK-2, and U2-OS/CA-IX and HEK/CA-IX clones. Briefly, a  
443 number of individual single clones were selected in the media containing 300  $\mu\text{g/ml}$  zeocin  
444 (Invitrogen, 450430, Carlsbad, CA), or 300  $\mu\text{g/ml}$  G418 and stable expression in individual  
445 clones were verified using western blotting. Cell lines were tested for mycoplasma using  
446 MycoAlert assay (Lonza).

#### 447 Spheroid formation

448 Spheroids were formed as previously described (Russell et al., 2017). Briefly, cells were  
449 suspended in Perfecta 3D hanging drop plates (HDP1096, 3D Biomatrix, MI) at 25K cells/40ul  
450 droplet. Spheroids were allowed to form for 5 days and then centrifuged at 450rpm, with no  
451 brake, into media-containing Costar Ultra low attachment U-bottom 96-well plates (CLS3474,  
452 Corning, NY). Spheroids were imaged in the Celigo Imaging Cytometer (Nexcelom Bioscience,  
453 MA) using bright field imaging single colony verification analysis.

#### 454 Western blotting

455 Chemiluminescence. The cell membrane protein samples were collected using Mem-PER  
456 eukaryotic membrane protein extraction reagent kit (Thermo Scientific, 89826, MA) according  
457 to the protocol instruction, and the protein samples were further purified and concentrated by  
458 Pierce SDS-PAGE sample prep kit (Thermo Scientific, 89888). Thirty micrograms of protein  
459 per sample was separated on polyacrylamide-SDS gels and electrophoretically transferred to  
460 nitrocellulose membranes. Membranes were incubated with primary antibody against PMA1  
461 (1:1000, Abcam, ab4645), and GAPDH (1:1000, Santa Cruz Biotechnology, TX, se-25778). For  
462 visualization, horseradish peroxidase (HRP)-conjugated secondary antibodies: Goat anti-rabbit  
463 IgG HRP and goat anti-mouse IgG HRP, followed by ECL kit (Thermo Scientific, 32209) were  
464 used.

465 Fluorescence. Fifteen  $\mu\text{g}$  of protein per sample was separated on a BioRad Mini-protein 4-15%  
466 precast 12 well 20  $\mu\text{l}$  gels (4561085, Bio-Rad, CA) and electrophoretically transferred to  
467 Odyssey Nitrocellulose membrane (P/N 926-31092, LI-COR, NE). Membranes were blocked

468 with Odyssey TBS Blocking Buffer ( P/N 927-50000, LI-COR, NE) and incubated with primary  
469 antibody against CA-IX(1:1000, M75 mouse monoclonal CA-IX, Bioscience Slovakia), ER  
470 alpha ( 1:2000, Rabbit polyclonal ab 75635, Abcam), rabbit Anti-CA12 antibody [EPR14861] -  
471 C-terminal (ab195233), rabbit Anti-Carbonic Anhydrase II antibody [EPR5195] (ab124687),  $\beta$ -  
472 Actin(1:2000, (8H10D10) Mouse mAb #3700- Cell Signaling), GAPDH (1:4000, rabbit  
473 monoclonal ab 181602, Abcam). For visualization, IRDye Fluorescent secondary antibodies (LI-  
474 COR) were used: IRDye 680RD Goat Anti-mouse IgG (H+L), IRDye 680RD Donkey anti-rabbit  
475 IgG (H+L), IRDye 800CW goat anti- mouse IgG(H+L) and IRDye 800CW donkey anti-rabbit  
476 IgG(H+L). Membranes were imaged on LI-COR Odyssey Blot Imager and quantified using  
477 Image Studio Version 2.1(LI-COR). Uncropped versions of western blots are available in  
478 Supplementary.

#### 479 Immunocytochemistry

480 Cells were grown on glass coverslips and fixed in 4% paraformaldehyde (Sigma-Aldrich)  
481 for 10 min at room temperature. Cells were blocked in 5% BSA for 1hr at room temperature.  
482 Cells were stained with the PMA1 antibody (1:100; SC-33735, Santa Cruz Biotechnology) or  
483 CA-IX antibody for 2 hours (1:500, ab184630, Abcam) and washed in PBS. Cells were further  
484 incubated for 1 h with secondary anti-rabbit-Alexa Fluor 594 antibody (1:2000; A11072,  
485 Invitrogen) or anti-mouse-Alexa Fluor 594(1:2000; A11005, Invitrogen) and additionally  
486 incubated in WGA, cell membrane marker (W6748, Invitrogen) for 10 min on ice. The cells  
487 were mounted for fluorescence with DAPI (H-1200, Vector). The slides were viewed by Leica  
488 inverted SP5 AOBS confocal microscope, and micrographs were taken, and images were  
489 subsequently acquired in the Moffitt Analytic Microscopy Core Facility by using dual  
490 photomultiplier tube detectors and LAS AF software (Leica Microsystems). For detection of  
491 intracellular PMA1, cells were fixed and permeabilized with 1:1 mixture of methanol and  
492 acetone, and immunostained with PMA1 antibody for 1h, followed by 1 hour of incubation with  
493 the secondary anti-rabbit Alexa488 antibody (Molecular Probes, Invitrogen). The cells were  
494 mounted and viewed by fluorescence microscopy.

#### 495 Proliferation rate assay

496 Cells were cultured in a 24-well plate under standard cell culture conditions for 24, 48,  
497 72, 96 hours, and the cell number and viability were determined with a trypan blue dye by using  
498 the Countess automated cell counter (Invitrogen).

#### 499 Oxygen consumption and proton production rate measurements (OCR and PPR)

500 Real-time oxygen consumption (OCR) and proton production rate (PPR) were measured  
501 by using the Seahorse Extracellular Flux (XFe-96) Analyzer (Seahorse Bioscience, Chicopee,  
502 MA). The cells were seeded in an XFe-96 microplate (Seahorse, V3-PET, 101104-004) in  
503 normal growth media overnight. The growth media were replaced with DMEM powder base  
504 media ( Sigma D5030) supplemented with 1.85g/L sodium chloride and 1mM glutamine, and the

505 cells were incubated in the media in the absence of glucose, when testing glycolysis, in a non-  
506 CO<sub>2</sub> incubator for one hour prior to the measurement. PPR and OCR were measured in the  
507 absence of glucose associated with the non-glycolytic activity, followed by two sequential  
508 injections of D-glucose (6mM) and oligomycin (1 μM) in real-time, which are associated with  
509 glycolytic activity and glycolytic capacity (reserve). The mitochondrial stress test was also used  
510 where cells were incubated in glucose (5.5mM), and glutamine (1mM) containing media and  
511 basal OCR and PPR measured, prior to sequential injection of Oligomycin (1 μM), associated  
512 with ATP linked OCR, FCCP(1 μM) associated with mitochondrial reserve capacity and  
513 Rotenone/Antimycin A (1 μM). Following the measurements, protein concentrations were  
514 determined *in situ* for each well using a standard BCA protein assay (Thermo Scientific Pierce).  
515 The OCR and PPR values were normalized to μg protein. Results were also normalized using  
516 Celigo High Throughput Micro-Well Imaging Cytometer (Nexcelom Bioscience) by bright-field  
517 direct cell counting and normalized per 10K cells prior to assay.

### 518 Glucose consumption and lactate production assays

519 Figure 1: Cells were seeded in a 96-well plate in the growth media containing 10% FBS. Once  
520 cells reached 90% confluence, the growth media were removed, and the cells were washed twice  
521 in PBS and media was replaced for 24 h. The media were collected from 24 h incubation for both  
522 glucose consumption and lactate production assays. The cells were then trypsinized and the cell  
523 densities were determined. Glucose quantification was conducted using glucose bioluminescent  
524 assay kit (Glucose Glo Assay, Promega) as described per manufacturer instruction. The lactate  
525 assay kit (Lactate Assay kit, Sigma Aldrich) was used to measure L (+)-Lactate in the culture  
526 media according to the manufacturer's instructions. Data were normalized by cell density per  
527 well and were reported as lactate production and glucose consumption per ug protein.

528  
529 Figure 5: Cells were seeded in a 6-well plate in growth media containing 10% FBS. Once cells  
530 reached 90% confluence, the growth media were removed, and the cells were washed twice in  
531 PBS and incubated in serum-free and phenol-red free media for 24 h. The media were collected  
532 from 24 h incubation for both glucose consumption and lactate production assays. The cells were  
533 trypsinized and the cell densities were determined. Glucose quantification was conducted using  
534 glucose colorimetric/fluorometric assay kit (BioVision, K606-100) as described per  
535 manufacturer instruction. The lactate assay kit II (BioVision, K627-100) was used to measure L  
536 (+)-Lactate in the culture media according to the manufacturer's instructions. Data were  
537 normalized by cell density per well and were reported as lactate production and glucose  
538 consumption as pmol per cell.

### 539 Glucose uptake radioactive assay

540 Cells were seeded in 24 well plates to 80% confluence. Cells were incubated for 1hr with  
541 1 μCi of Deoxy-D-glucose, 2-[1,2-<sup>3</sup>H(N)] (NET549250UC, Perkin Elmer, MA) at 37°. Cells  
542 were washed 2 x DPBS and lysed with 300ul of NaOH, cell extract was added to a vial with 6ml  
543 of Eoscient XR scintillation liquid (LS-272, National Diagnostics, GA). Uptake was quantified by

544 measuring  $^3\text{H}$  in a Perkin Elmer TriCarb scintillation counter and normalizing to protein  
545 concentration.

546 YSI 2950D biochemical analysis of lactate

547 Cells were seeded in a 96-well plate in the growth media containing 10% FBS. Once cells  
548 reached 90% confluence, the growth media were removed, and the cells were washed twice in  
549 PBS and media was replaced for 24 h or 48hr. The media were collected from 24 h & 48hr  
550 incubation for lactate production measurement. The cell densities per well were determined by  
551 Celligo imaging cytometer brightfield cell count application. Lactate quantification was  
552 measured by the YSI. Data were normalized by relative cell number and were reported as lactate  
553 production in g/L/per cell.

554 Untargeted metabolomics

555 Samples were prepared according to Beth Israel Deaconess Medical Centre Mass  
556 Spectrometry Core and run on a Thermo QExactive Plus/HF Orbitrap LC-MS/MS. Briefly, cells  
557 were grown to 80% confluence in 10cm<sup>2</sup> dishes. Cells were changed into fresh media two hours  
558 prior to collection, media was aspirated, cells were washed in ice cold PBS, and 1ml of 80%  
559 methanol (-80°C) added to plate on dry ice, then transferred to -80°C freezer for 15 minutes. The  
560 cell plate was scraped on dry ice and contents collected. Sample was spun in cold centrifuge at  
561 max speed for 20min and supernatant removed. Supernatant was dried in speed vac for 5hrs then  
562 stored at -80°C. Before Mass Spec analysis, samples were resuspended in HPLC grade water  
563 relative to protein concentration. Data were analyzed using Metaboanalyst online software, there  
564 was no data filtering, and data were normalized by sum of all metabolites per sample.

565 Intracellular pH (pHi)

566 *Solutions and media.* (i) Solutions for Seahorse experiments: 2mM HEPES, 2mM MES, 5.3 mM  
567 KCl, 5.6 mM NaPhosphate, 11 mM glucose, 133 mM NaCl, 0.4 mM MgCl<sub>2</sub>, 0.42 mM CaCl<sub>2</sub>,  
568 titrated to given pH with NaOH. For reduced Cl<sup>-</sup> experiments, 133 mM NaCl was replaced with  
569 133 mM NaGluconate and MgCl<sub>2</sub> and CaCl<sub>2</sub> were raised to 0.74 mM and 1.46 mM, respectively,  
570 to account for gluconate-divalent binding. Calibration solutions for nigericin: 145 mM KCl, 1  
571 mM MgCl<sub>2</sub>, 0.5 mM EGTA, 10 mM HEPES, 10 mM MES and adjusted with NaOH to required  
572 pH. pHe media to measure pHi: Solution A: 125mM NaCl, 4.5mM KCl, 1mM CaCl<sub>2</sub>, 1mM  
573 MgCl<sub>2</sub>, 11mM glucose base media. Split solution A into two parts- Solution B: 22mM HCO<sub>3</sub><sup>-</sup>  
574 and Solution C: 22mM NaCl. Mix B&C as follows- 40ml B & 0ml C= 22mM HCO<sub>3</sub><sup>-</sup> (pH7.41),  
575 20ml B & 20ml C =11mM HCO<sub>3</sub><sup>-</sup> (pH7.11), 10ml B & 30ml C=5.5mM HCO<sub>3</sub><sup>-</sup> (pH6.81), and  
576 4ml B & 36ml C=2.2mM(pH6.41).

577 *Fluorescent Labeling and Image Analysis.* Cells were loaded with 10uM cSNARF1 and 2.7uM  
578 Hoechst 33342 for 10mins at 37°. Cells were washed in neutral pH media and imaged in various  
579 pHe media (6.4-7.4) on Leica SP5 Confocal Microscopy x40 objective. Cytoplasmic pH was

580 measured by gating pixels according to a threshold level of Hoechst signal within cSNARF1-  
581 positive pixels. Fluorescence at 580 and 640 nm was averaged, background offset and ratioed for  
582 each particle representing a cell.

### 583 Cell invasion and migration assay in vitro

584 *In vitro* cell motility and invasiveness were measured by methods as previously reported  
585 with some modifications<sup>30</sup>. The motility change was measured by the circular wound healing  
586 assay using Oris™ Cell Migration Assay Kit (Platypus, CMAU101). Cells were plated on a 96-  
587 well plate at  $1 \times 10^6$  cells/ml while a cell seeding stopper masker the circular area at the center of  
588 each well. The cell seeding stoppers were removed 24 hours after the plating and cells were  
589 cultured a further 30 hours to monitor the closing of the cell-free area (wound area). The area  
590 covered by live cells was measured by labeling cells with Calcein-AM (Life Technology, C3099)  
591 and analyzing microscopic images (2.5x) by Image J (NIH). The smaller wound size represents  
592 the higher motility.

593 Wound healing scratch assay was used to measure motility into CA-IX clones. 96-well  
594 plates were seeded with  $1 \times 10^6$  cells/ml per well in 10% FBS, 1% PenStrep RPMI-1640 and  
595 incubated overnight. The plate was uniformly scratched with Essen Bioscience 96 Woundmaker,  
596 media was removed, and the plate washed with DPBS and then 200ul of media was added to  
597 each well. The wound was imaged on Celigo Imaging Cytometer and the number of cells that  
598 migrated into the wound was quantified by direct bright field cell counting at 0, 24, 48hr.

599 Cell invasiveness was measured by monitoring cells escaping from Matrigel (Becton  
600 Dickenson, 356231). Cells were suspended in 50% Matrigel in serum-free RPMI-1640 at  $1 \times 10^7$   
601 cells/ml. A Matrigel droplet (volume =  $5 \mu\text{l}$ ) was placed on each well of a 24-well plate. The  
602 Matrigel was solidified by incubating at  $37^\circ\text{C}$  overnight and then FBS-containing normal growth  
603 media was added. The cells escaped from the Matrigel droplet were monitored in real-time by  
604 using the IncuCyte ZOOM system (Essen BioScience) or Celigo Imaging Cytometer (Nexcelom  
605 Bioscience, MA). After 7 days of culture, the cell expansion from the droplets was quantified by  
606 Celigo single colony verification algorithm or Image J after fixing cells in 3.7 % formaldehyde  
607 and staining in crystal violet solution. The larger area occupied by cells represents the higher  
608 invasion potential.

609 *Normalization of invasion and migration assays.* The results of invasion and migration assays  
610 were normalized by the proliferation rates of the cells. Proliferation rates were calculated by a  
611 linear fit of cell growth, 48 hours after seeding the cells (See Figure S16) and weighted by the  
612 standards error. The normalization was carried out in order to eliminate inherent differences  
613 between clones making it possible to compare them. In the case of the invasion assay, final  
614 growth was divided by the proliferation rate of each of the cells. For the migration assay (i.e.  
615 wound healing assay), the relative healed area was divided by its corresponding growth rate and  
616 then multiplied by the growth rate of the MOCK-1 cells. This allowed comparison between the  
617 normalized healed areas of each clone, to one of the MOCK-1 cells. We used the Matlab R2012a  
618 curve fitting toolbox (The MathWorks, MA). Matlab code is available in the Supplementary  
619 materials.

620 SCID mice

621 Six-week-old female SCID Beige mice were purchased from Charles River Laboratories.  
622 Mice were given a week to acclimate to the animal facility before they were studied. To  
623 minimize the risk of any exogenous infection, the SCID mice were maintained and cared for in a  
624 sterile, static micro-isolation cage. Mice received irradiated food (Harlan Laboratories) and  
625 sterile water *ad libitum*. All animal experiments were performed under a protocol approved by  
626 the University of South Florida Institutional Animal Care and Use Committee.

627 Metastasis assays in vivo

628 Since MCF-7 cells are estrogen-dependent for tumor formation, estrogen pellets, 17  $\beta$   
629 estradiol, 0.72 mg/pellet, 60-day release (Innovative Research of America, SE-121) were  
630 subcutaneously implanted in the shoulder region of the mice two days prior to tumor inoculation.  
631 For the primary tumor growth study with MCF-7/MOCK-2 or MCF-7/ CA-IX M6 cells, mice  
632 were given 200nM 17  $\beta$  estradiol in drinking water to try and prevent adverse side effects of  
633 pellet use, including bladder stones and urinary tract infections.

634 For the experimental metastasis, SCID mice were injected through tail veins with  $1 \times$   
635  $10^6$  cells in 200  $\mu$ l of PBS solution (either MCF-7/MOCK-1, MCF-7/PMA1-C1, MCF-7/MOCK-  
636 2, MCF-7/CA-IX M1 or MCF-7/CA-IX M6 cells). Three months after injection of the cancer  
637 cells, the mice were euthanized, and the lung tissues were surgically excised, fixed, and stained  
638 with hematoxylin and eosin (HE). Lung sections (at least three histologic sections for each lung  
639 specimen) were examined for metastatic nodules under a light microscope by a breast cancer  
640 pathologist (A.L or M.M.B) who was blinded to identifiers.

641 For the spontaneous metastasis studies, approximately  $10 \times 10^6$  cells (either MCF-  
642 7/MOCK-1 and MCF-7/PMA1-C1) in 100  $\mu$ l of PBS +100  $\mu$ l of Matrigel were injected into the  
643 mammary fat pads of mice. Once tumors reached approximately 400 mm<sup>3</sup>, or 6 weeks post-cell  
644 injection, the tumors were resected, fixed, and stained with H&E, or PMA1 antibody. Three  
645 months after resection, the mice were sacrificed, and lung sections were examined for lung  
646 metastases. The tumors were measured twice every week throughout the study with a digital  
647 caliper and volume values were calculated with the formula  $V = (\text{Length} \times \text{Width}^2)/2$ . The body  
648 weights were monitored twice a week throughout the study.

649 Treatment model

650 Female SCID Beige mice received 200mmol/L of sodium bicarbonate water 2 days prior  
651 to tail vein injection for experimental metastasis study. Mice continued receiving bicarbonate  
652 water until the end of the experiment. Control mice received regular tap water. Since MCF-7  
653 cells are estrogen-dependent for tumor formation, estrogen pellets, 17  $\beta$ -estradiol, 0.36  
654 mg/pellet, 90-day release (Innovative Research of America, SE-121) were subcutaneously  
655 implanted in the shoulder region of the mice two days prior to tumor inoculation. For the  
656 experimental metastasis, SCID mice were injected through tail veins with  $1 \times 10^6$  cells in 200

657  $\mu$ l of PBS solution (MCF-7/MOCK-2 and MCF-7/CA-IX M6 cells). Once MCF-7/CA-IX M6  
658 control group had observable lung metastasis by T2 MRI (~74 days), mice were humanely  
659 euthanized, and lungs and kidney collected.

## 660 *Histology*

661 The tissues were harvested, fixed in 10% neutral buffered formalin (Thermo Scientific),  
662 processed, and embedded in paraffin. Tissue sections (4  $\mu$ m) were prepared and stained with  
663 H&E in the Moffitt Cancer Center Tissue Core. The histological slides of resected primary breast  
664 tumor xenografts from MCF-7/MOCK-1 or MCF-7/PMA1-C1 groups, and MCF-7/MOCK-2,  
665 MCF-7/CA-IX M1 and MCF-7/CA-IX M6 groups. were blindly examined under a light  
666 microscope by a pathologist (A.L or M.M.B) for tumor grades using the most common grading  
667 system: G1: well differentiated (low grade); G2: moderately differentiated (intermediate grade)  
668 G3: poorly differentiated (high grade); G4: undifferentiated (very high grade), as assessed  
669 according to histological features of stromal hypercellularity, atypia, stromal mitotic activity,  
670 presence of stromal over-growth and mitosis, necrosis, spindle cells differential and chromatin  
671 activity. Tumor burden in the lung was measured by Aperio ImageScope (Leica Biosystems, IL)  
672 and calculated as % of total lung tissue and compared between groups. Tumors were drawn  
673 around by hand using the Aperio software and confirmed by a pathologist (M.M.B), % area of  
674 tumor in lungs was then calculated by comparing the area of total lung tissue to the area of the  
675 tumor within lungs. For all lung metastases IHC, three different sections were taken from each  
676 lung and analyzed, with 5-6 sections taken between each analyzed slice to ensure entirety of  
677 lungs, and metastatic burden was analyzed.

678

## 679 *Immunohistochemical (IHC) staining*

680 The cross-sections were stained with various antibodies as per normal laboratory protocol  
681 in the Moffitt Tissue Core Histology Facility. Positive and negative controls were used for each  
682 antibody staining and staining condition was optimized for each antibody. The antibodies were  
683 utilized in this study as follows: rabbit anti-*Saccharomyces cerevisiae* PMA1 (sc-33735, Santa  
684 Cruz Biotechnology); rabbit anti-human CA-IX (ab15086, Abcam, Cambridge, MA); rabbit anti-  
685 human MCT1 (sc-50324, Santa Cruz, CA); rabbit anti-human GLUT1 (ab15309, Abcam,  
686 Cambridge, MA); rabbit anti-human NHE1 (sc-28758, Santa Cruz, CA); rabbit anti-human ER(  
687 #RM9101, ThermoFisher Scientific, MA). Histological stained slides were scanned using the  
688 Aperio ScanScope XT digital slide scanner and positivity analysis for each target gene staining  
689 was carried out using Aperio ImageScope V 10.2.1.2314 software. Positive cell percentage was  
690 calculated for PMA1, CA9, MCT1, GLUT1, and NHE1 expression on the entire tissue cross-  
691 section using algorithm membrane 9 in which positive cells include the cells with (3+) strong;  
692 (2+) medium; (1+) weak membrane intensity staining.

693 RNA analyses in formalin-fixed, paraffin-embedded (FFPE) tissue

694 FFPE tissue samples were cut in 10µm- thick sections on a microtome, and  
695 deparaffinized by deparaffinization solution (Qiagen, 19093). Total RNA was extracted from  
696 deparaffinized FFPE sections with the miRNeasy FFPE kit (Qiagen, 217504) following the  
697 manufacturer's protocol. Real-time qRT-PCR analyses for PMA1 mRNA were described above  
698 in the qRT-PCR section. Experimental C<sub>t</sub> values from PMA1 amplification were normalized with  
699 GAPDH C<sub>t</sub> values and were expressed relative to MCF-7/MOCK-1 control C<sub>t</sub> values.

700 Statistical analyses

701 A two-tailed unpaired student T-test or Welch's T-test was employed to determine  
702 statistical significance. Ordinary one-way ANOVA with Geisser Greenhouse correction and  
703 Tukey's Multiple Comparison test, with a single pooled variance. A p-value of less than 0.05 was  
704 considered statistically significant or otherwise indicated. Kaplan Meier Curve was used to  
705 analyze overall survival in mouse models with Log-Rank Test curve comparison.

706 Data and code availability

707 The authors declare that the data supporting the findings of this study are available within  
708 the paper and its Supplementary information files. The code is available in the Supplementary  
709 data. Figures with raw data associated include Fig. 5H, associated raw data are found in  
710 Supplementary figures S19.

## REFERENCES

- 711 Beketic-Oreskovic, L., Ozretic, P., Rabbani, Z.N., Jackson, I.L., Sarcevic, B., Levanat, S., and  
712 Vujaskovic, Z. (2010). Prognostic significance of carbonic anhydrase IX (CAIX), endoglin  
713 (CD105), and 8-hydroxy-2deoxyguanosine (8-OHdG) in breast cancer patients. *Journal of Clinical*  
714 *Oncology* 28, e21048-e21048.
- 715 Birchmeier, C., Birchmeier, W., Gherardi, E., and Vande Woude, G.F. (2003). Met, metastasis,  
716 motility and more. *Nat Rev Mol Cell Biol* 4, 915-925.
- 717 Boedtkjer, E. (2019). Na(+),HCO3(-) cotransporter NBCn1 accelerates breast carcinogenesis.  
718 *Cancer Metastasis Rev* 38, 165-178.
- 719 Brand, A., Singer, K., Koehl, G.E., Kolitzus, M., Schoenhammer, G., Thiel, A., Matos, C., Bruss,  
720 C., Klobuch, S., Peter, K., *et al.* (2016). LDHA-Associated Lactic Acid Production Blunts Tumor  
721 Immunosurveillance by T and NK Cells. *Cell Metab* 24, 657-671.



- 722 Buzzai, M., Bauer, D.E., Jones, R.G., Deberardinis, R.J., Hatzivassiliou, G., Elstrom, R.L., and  
723 Thompson, C.B. (2005). The glucose dependence of Akt-transformed cells can be reversed by  
724 pharmacologic activation of fatty acid beta-oxidation. *Oncogene* 24, 4165-4173.
- 725 Cardone, R.A., Greco, M.R., Zeeberg, K., Zaccagnino, A., Saccomano, M., Bellizzi, A., Bruns, P.,  
726 Menga, M., Pilarsky, C., Schwab, A., *et al.* (2015). A novel NHE1-centered signaling cassette  
727 drives epidermal growth factor receptor-dependent pancreatic tumor metastasis and is a target for  
728 combination therapy. *Neoplasia* 17, 155-166.
- 729 Carracedo, A., Cantley, L.C., and Pandolfi, P.P. (2013). Cancer metabolism: fatty acid oxidation  
730 in the limelight. *Nature reviews Cancer* 13, 227-232.
- 731 Cheng, P.C., Lin, H.Y., Chen, Y.S., Cheng, R.C., Su, H.C., and Huang, R.C. (2019). The  
732 Na(+)/H(+)-Exchanger NHE1 Regulates Extra- and Intracellular pH and Nimodipine-sensitive  
733 [Ca(2+)]<sub>i</sub> in the Suprachiasmatic Nucleus. *Sci Rep* 9, 6430.
- 734 Choschzick, M., Oosterwijk, E., Muller, V., Woelber, L., Simon, R., Moch, H., and Tennstedt, P.  
735 (2011). Overexpression of carbonic anhydrase IX (CA-IX) is an independent unfavorable  
736 prognostic marker in endometrioid ovarian cancer. *Virchows Archiv : an international journal of*  
737 *pathology* 459, 193-200.
- 738 Cori, C.F., and Cori, G.T. (1925). The Carbohydrate Metabolism of Tumors I: THE FREE  
739 SUGAR, LACTIC ACID, AND GLYCOGEN CONTENT OF MALIGNANT TUMORS. *J Biol*  
740 *Chem* 64, 11.
- 741 Csaderova, L., Debreova, M., Radvak, P., Stano, M., Vrestiakova, M., Kopacek, J., Pastorekova,  
742 S., and Svastova, E. (2013). The effect of carbonic anhydrase IX on focal contacts during cell  
743 spreading and migration. *Front Physiol* 4, 271.
- 744 Damaghi, M., Tafreshi, N.K., Lloyd, M.C., Sprung, R., Estrella, V., Wojtkowiak, J.W., Morse,  
745 D.L., Koomen, J.M., Bui, M.M., Gatenby, R.A., *et al.* (2015). Chronic acidosis in the tumour  
746 microenvironment selects for overexpression of LAMP2 in the plasma membrane. *Nat Commun*  
747 6, 8752.
- 748 Damaghi, M., West, J., Robertson-Tessi, M., Xu, L., Ferrall-Fairbanks, M.C., Stewart, P.A., Persi,  
749 E., Fridley, B.L., Altrock, P.M., Gatenby, R.A., *et al.* (2021). The harsh microenvironment in early  
750 breast cancer selects for a Warburg phenotype. *Proc Nat Acad Sci USA (in press)*.
- 751 DeBerardinis, R.J., and Chandel, N.S. (2020). We need to talk about the Warburg effect. *Nature*  
752 *Metabolism* 2, 127-129.
- 753 Doherty, J.R., Yang, C., Scott, K.E., Cameron, M.D., Fallahi, M., Li, W., Hall, M.A., Amelio,  
754 A.L., Mishra, J.K., Li, F., *et al.* (2014). Blocking lactate export by inhibiting the Myc target MCT1  
755 Disables glycolysis and glutathione synthesis. *Cancer Res* 74, 908-920.

- 756 Epstein, T., Xu, L., Gillies, R.J., and Gatenby, R.A. (2014). Separation of metabolic supply and  
757 demand: aerobic glycolysis as a normal physiological response to fluctuating energetic demands  
758 in the membrane. *Cancer & metabolism* 2, 7.
- 759 Estrella, V., Chen, T., Lloyd, M., Wojtkowiak, J., Cornnell, H.H., Ibrahim-Hashim, A., Bailey, K.,  
760 Balagurunathan, Y., Rothberg, J.M., Sloane, B.F., *et al.* (2013). Acidity generated by the tumor  
761 microenvironment drives local invasion. *Cancer Res* 73, 1524-1535.
- 762 Fais, S. (2015). Evidence-based support for the use of proton pump inhibitors in cancer therapy. *J*  
763 *Transl Med* 13, 368.
- 764 Ferreira, T., Mason, A.B., and Slayman, C.W. (2001). The yeast Pma1 proton pump: a model for  
765 understanding the biogenesis of plasma membrane proteins. *The Journal of biological chemistry*  
766 276, 29613-29616.
- 767 Gatenby, R.A., Gawlinski, E.T., Gmitro, A.F., Kaylor, B., and Gillies, R.J. (2006a). Acid-mediated  
768 tumor invasion: a multidisciplinary study. *Cancer Res* 66, 5216-5223.
- 769 Gatenby, R.A., Gawlinski, E.T., Gmitro, A.F., Kaylor, B., and Gillies, R.J. (2006b). Acid-mediated  
770 tumor invasion: a multidisciplinary study. *Cancer Res* 66, 5216-5223.
- 771 Gatenby, R.A., and Gillies, R.J. (2004a). Why do cancers have high aerobic glycolysis? *Nat Rev*  
772 *Cancer* 4, 891-899.
- 773 Gatenby, R.A., and Gillies, R.J. (2004b). Why do cancers have high aerobic glycolysis? *Nature*  
774 *reviews Cancer* 4, 891-899.
- 775 Gillies, R.J., Robey, I., and Gatenby, R.A. (2008). Causes and consequences of increased glucose  
776 metabolism of cancers. *Journal of nuclear medicine : official publication, Society of Nuclear*  
777 *Medicine* 49 *Suppl* 2, 24S-42S.
- 778 Gillies, R.J.M.-Z., R.; Martinez, G.M.; Serrano, R.; Perona, R. (1990). Tumorigenic 3T3 cells  
779 maintain an alkaline intracellular pH under physiological conditions.
- 780 Hanahan, D., and Weinberg, R.A. (2011). Hallmarks of cancer: the next generation. *Cell* 144, 646-  
781 674.
- 782 Hiraga, T., Ito, S., and Nakamura, H. (2013). Cancer stem-like cell marker CD44 promotes bone  
783 metastases by enhancing tumorigenicity, cell motility, and hyaluronan production. *Cancer Res* 73,  
784 4112-4122.
- 785 Ibrahim-Hashim, A., Abrahams, D., Enriquez-Navas, P.M., Luddy, K., Gatenby, R.A., and Gillies,  
786 R.J. (2017). Tris-base buffer: a promising new inhibitor for cancer progression and metastasis.  
787 *Cancer Medicine* 6, 1720-1729.

- 788 Ibrahim-Hashim, A., Cornnell, H.H., Abrahams, D., Lloyd, M., Bui, M., Gillies, R.J., and Gatenby,  
789 R.A. (2012). Systemic buffers inhibit carcinogenesis in TRAMP mice. *The Journal of urology* *188*,  
790 624-631.
- 791 Jamali, S., Klier, M., Ames, S., Barros, L.F., McKenna, R., Deitmer, J.W., and Becker, H.M.  
792 (2015). Hypoxia-induced carbonic anhydrase IX facilitates lactate flux in human breast cancer  
793 cells by non-catalytic function. *Sci Rep* *5*, 13605.
- 794 Jin, L., Chun, J., Pan, C., Kumar, A., Zhang, G., Ha, Y., Li, D., Alesi, G.N., Kang, Y., Zhou, L.,  
795 *et al.* (2018). The PLAG1-GDH1 Axis Promotes Anoikis Resistance and Tumor Metastasis  
796 through CamKK2-AMPK Signaling in LKB1-Deficient Lung Cancer. *Mol Cell* *69*, 87-99 e87.
- 797 Kato, H., Semba, S., Miskad, U.A., Seo, Y., Kasuga, M., and Yokozaki, H. (2004). High  
798 Expression of PRL-3 Promotes Cancer Cell Motility and Liver Metastasis in Human Colorectal  
799 Cancer: A Predictive Molecular Marker of Metachronous Liver and Lung Metastases. *Clin Cancer*  
800 *Res.*
- 801 Kato, Y., Lambert, C.A., Colige, A.C., Mineur, P., Noel, A., Frankenhe, F., Foidart, J.M., Baba,  
802 M., Hata, R., Miyazaki, K., *et al.* (2005). Acidic extracellular pH induces matrix  
803 metalloproteinase-9 expression in mouse metastatic melanoma cells through the phospholipase D-  
804 mitogen-activated protein kinase signaling. *The Journal of biological chemistry* *280*, 10938-  
805 10944.
- 806 Kim, J.W., Gao, P., Liu, Y.C., Semenza, G.L., and Dang, C.V. (2007). Hypoxia-inducible factor  
807 1 and dysregulated c-Myc cooperatively induce vascular endothelial growth factor and metabolic  
808 switches hexokinase 2 and pyruvate dehydrogenase kinase 1. *Mol Cell Biol* *27*, 7381-7393.
- 809 Kopacek, J., Barathova, M., Dequiedt, F., Sepelakova, J., Kettmann, R., Pastorek, J., and  
810 Pastorekova, S. (2005). MAPK pathway contributes to density- and hypoxia-induced expression  
811 of the tumor-associated carbonic anhydrase IX. *Biochim Biophys Acta* *1729*, 41-49.
- 812 Kunkel, M., Reichert, T.E., Benz, P., Lehr, H.A., Jeong, J.H., Wieand, S., Bartenstein, P., Wagner,  
813 W., and Whiteside, T.L. (2003). Overexpression of Glut-1 and increased glucose metabolism in  
814 tumors are associated with a poor prognosis in patients with oral squamous cell carcinoma. *Cancer*  
815 *97*, 1015-1024.
- 816 Lee, S.H., McIntyre, D., Honess, D., Hulikova, A., Pacheco-Torres, J., Cerdan, S., Swietach, P.,  
817 Harris, A.L., and Griffiths, J.R. (2018). Carbonic anhydrase IX is a pH-stat that sets an acidic  
818 tumour extracellular pH in vivo. *Br J Cancer* *119*, 622-630.
- 819 Li, Y., Tu, C., Wang, H., Silverman, D.N., and Frost, S.C. (2011). Catalysis and pH control by  
820 membrane-associated carbonic anhydrase IX in MDA-MB-231 breast cancer cells. *The Journal of*  
821 *biological chemistry* *286*, 15789-15796.
- 822 Lloyd, M.C., Cunningham, J.J., Bui, M.M., Gillies, R.J., Brown, J.S., and Gatenby, R.A. (2016).  
823 Darwinian Dynamics of Intratumoral Heterogeneity: Not Solely Random Mutations but Also  
824 Variable Environmental Selection Forces. *Cancer research* *76*, 3136-3144.

- 825 Lou, Y., McDonald, P.C., Oloumi, A., Chia, S., Ostlund, C., Ahmadi, A., Kyle, A., Auf dem  
826 Keller, U., Leung, S., Huntsman, D., *et al.* (2011). Targeting tumor hypoxia: suppression of breast  
827 tumor growth and metastasis by novel carbonic anhydrase IX inhibitors. *Cancer Res* 71, 3364-  
828 3376.
- 829 Lunt, S.Y., and Vander Heiden, M.G. (2011). Aerobic glycolysis: meeting the metabolic  
830 requirements of cell proliferation. *Annu Rev Cell Dev Biol* 27, 441-464.
- 831 Mahon, B.P., Bhatt, A., Socorro, L., Driscoll, J.M., Okoh, C., Lomelino, C.L., Mboge, M.Y.,  
832 Kurian, J.J., Tu, C., Agbandje-McKenna, M., *et al.* (2016). Structure of carbonic anhydrase IX is  
833 adapted for low pH catalysis. *Biochemistry*.
- 834 Martinez, G.V., Martinez-Zaguilan, R., and Gillies, R.J. (1994). Effect of Glucose on intracellular  
835 pH and Ca<sup>2+</sup> in NIH-3T3 Cells Transfected With the Yeast P-Type H<sup>+</sup>ATPase. *J Cell Physiol*.
- 836 McIntyre, A., Patiar, S., Wigfield, S., Li, J.L., Ledaki, I., Turley, H., Leek, R., Snell, C., Gatter,  
837 K., Sly, W.S., *et al.* (2012). Carbonic anhydrase IX promotes tumor growth and necrosis in vivo  
838 and inhibition enhances anti-VEGF therapy. *Clinical cancer research : an official journal of the*  
839 *American Association for Cancer Research* 18, 3100-3111.
- 840 Moellering, R.E., Black, K.C., Krishnamurty, C., Baggett, B.K., Stafford, P., Rain, M., Gatenby,  
841 R.A., and Gillies, R.J. (2008). Acid treatment of melanoma cells selects for invasive phenotypes.  
842 *Clinical & experimental metastasis* 25, 411-425.
- 843 Morgan, P.E., Pastorekova, S., Stuart-Tilley, A.K., Alper, S.L., and Casey, J.R. (2007).  
844 Interactions of transmembrane carbonic anhydrase, CAIX, with bicarbonate transporters.  
845 *American journal of physiology Cell physiology* 293, C738-748.
- 846 Nieto, M.A., Huang, R.Y., Jackson, R.A., and Thiery, J.P. (2016). Emt: 2016. *Cell* 166, 21-45.
- 847 Nordfors, K., Haapasalo, J., Haapasalo, H., and Parkkil, S. (2013). Carbonic Anhydrase IX in  
848 Adult and Pediatric Brain Tumors. In *Evolution of the Molecular Biology of Brain Tumors and*  
849 *the Therapeutic Implications*.
- 850 Paoli, P., Giannoni, E., and Chiarugi, P. (2013). Anoikis molecular pathways and its role in cancer  
851 progression. *Biochim Biophys Acta* 1833, 3481-3498.
- 852 Pastushenko, I., Brisebarre, A., Sifrim, A., Fioramonti, M., Revenco, T., Boumahdi, S., Van  
853 Keymeulen, A., Brown, D., Moers, V., Lemaire, S., *et al.* (2018). Identification of the tumour  
854 transition states occurring during EMT. *Nature* 556, 463-468.
- 855 Peppicelli, S., Ruzzolini, J., Bianchini, F., Andreucci, E., Nediani, C., Laurenzana, A., Margheri,  
856 F., Fibbi, G., and Calorini, L. (2019). Anoikis Resistance as a Further Trait of Acidic-Adapted  
857 Melanoma Cells. *J Oncol* 2019, 8340926.
- 858 Perona, R., and Serrano, R. (1988). Increase pH and tumorigenicity of fibroblasts expressing a  
859 yeast proton pump. *Nature*.

- 860 Persi, E., Duran-Frigola, M., Damaghi, M., Roush, W.R., Aloy, P., Cleveland, J.L., Gillies, R.J.,  
861 and Ruppin, E. (2018). Systems analysis of intracellular pH vulnerabilities for cancer therapy. *Nat*  
862 *Commun* 9, 2997.
- 863 Puisieux, A., Brabletz, T., and Caramel, J. (2014). Oncogenic roles of EMT-inducing transcription  
864 factors. *Nat Cell Biol* 16, 488-494.
- 865 Riemann, A., Rauschner, M., Giesselmann, M., Reime, S., Haupt, V., and Thews, O. (2019).  
866 Extracellular Acidosis Modulates the Expression of Epithelial-Mesenchymal Transition (EMT)  
867 Markers and Adhesion of Epithelial and Tumor Cells. *Neoplasia* 21, 450-458.
- 868 Rizwan, A., Serganova, I., Khanin, R., Karabeber, H., Ni, X., Thakur, S., Zakian, K.L., Blasberg,  
869 R., and Koutcher, J.A. (2013). Relationships between LDH-A, lactate, and metastases in 4T1  
870 breast tumors. *Clin Cancer Res* 19, 5158-5169.
- 871 Robey, I.F., Baggett, B.K., Kirkpatrick, N.D., Roe, D.J., Dosesco, J., Sloane, B.F., Hashim, A.I.,  
872 Morse, D.L., Raghunand, N., Gatenby, R.A., *et al.* (2009). Bicarbonate increases tumor pH and  
873 inhibits spontaneous metastases. *Cancer Res* 69, 2260-2268.
- 874 Rohani, N., Hao, L., Alexis, M.S., Joughin, B.A., Krismer, K., Moufarrej, M.N., Soltis, A.R.,  
875 Lauffenburger, D.A., Yaffe, M.B., Burge, C.B., *et al.* (2019). Acidification of Tumor at Stromal  
876 Boundaries Drives Transcriptome Alterations Associated with Aggressive Phenotypes. *Cancer*  
877 *research* 79, 1952-1966.
- 878 Russell, S., Wojtkowiak, J., Neilson, A., and Gillies, R.J. (2017). Metabolic Profiling of healthy  
879 and cancerous tissues in 2D and 3D. *Sci Rep* 7, 15285.
- 880 Sasaki, S., and Yoshiyama, N. (1988). Interaction of Chloride and Bicarbonate Transport across  
881 the Basolateral Membrane of Rabbit Proximal Straight Tubule: Evidence for Sodium Coupled  
882 Chloride/Bicarbonate Exchange. *J Clin Invest*.
- 883 Shin, H.J., Rho, S.B., Jung, D.C., Han, I.O., Oh, E.S., and Kim, J.Y. (2011). Carbonic anhydrase  
884 IX (CA9) modulates tumor-associated cell migration and invasion. *J Cell Sci* 124, 1077-1087.
- 885 Shiratori, R., Furuichi, K., Yamaguchi, M., Miyazaki, N., Aoki, H., Chibana, H., Ito, K., and Aoki,  
886 S. (2019). Glycolytic suppression dramatically changes the intracellular metabolic profile of  
887 multiple cancer cell lines in a mitochondrial metabolism-dependent manner. *Sci Rep* 9, 18699.
- 888 Silvia Pastorekova, Seppo Parkkila, Anna-Kaisa Parkkila, Rene Opavsky, Vladimir Zelnik, Juha  
889 Saarnio, and Pastorek., J. (1997). Carbonic Anhydrase IX, MN/CA IX: Analysis of Stomach  
890 Complementary DNA Sequence and Expression in Human and Rat Alimentary Tracts.  
891 *Gastroenterology*.
- 892 Stock, C., and Schwab, A. (2009). Protons make tumor cells move like clockwork. *Pflugers Arch*  
893 458, 981-992.

- 894 Svastova, E., Witariski, W., Csaderova, L., Kosik, I., Skvarkova, L., Hulikova, A., Zatovicova, M.,  
895 Barathova, M., Kopacek, J., Pastorek, J., *et al.* (2012). Carbonic anhydrase IX interacts with  
896 bicarbonate transporters in lamellipodia and increases cell migration via its catalytic domain. *The*  
897 *Journal of biological chemistry* 287, 3392-3402.
- 898 Swayampakula, M., McDonald, P.C., Vallejo, M., Coyaud, E., Chafe, S.C., Westerback, A.,  
899 Venkateswaran, G., Shankar, J., Gao, G., Laurent, E.M.N., *et al.* (2017). The interactome of  
900 metabolic enzyme carbonic anhydrase IX reveals novel roles in tumor cell migration and  
901 invadopodia/MMP14-mediated invasion. *Oncogene*.
- 902 Swietach, P., Patiar, S., Supuran, C.T., Harris, A.L., and Vaughan-Jones, R.D. (2009). The role of  
903 carbonic anhydrase 9 in regulating extracellular and intracellular pH in three-dimensional tumor  
904 cell growths. *The Journal of biological chemistry* 284, 20299-20310.
- 905 Takacova, M., Holotnakova, T., Barathova, M., Pastorekova, S., Kopacek, J., and Pastorek, J.  
906 (2010). Src induces expression of carbonic anhydrase IX via hypoxia-inducible factor 1. *Oncol*  
907 *Rep* 23, 869-874.
- 908 van Kuijk, S.J., Yaromina, A., Houben, R., Niemans, R., Lambin, P., and Dubois, L.J. (2016).  
909 Prognostic Significance of Carbonic Anhydrase IX Expression in Cancer Patients: A Meta-  
910 Analysis. *Front Oncol* 6, 69.
- 911 Vander Heiden, M.G., Cantley, L.C., and Thompson, C.B. (2009). Understanding the Warburg  
912 effect: the metabolic requirements of cell proliferation. *Science* 324, 1029-1033.
- 913 Vaupel, P., and Multhoff, G. (2020). Revisiting the warburg effect: historical dogma versus current  
914 understanding. *J Physiol*.
- 915 Walenta, S., Wetterling, M., Lehrke, M., Schwickert, G., Sundfor, K., Rofstad, E.K., and Mueller-  
916 Klieser, W. (2000). High lactate levels predict likelihood of metastases, tumor recurrence, and  
917 restricted patient survival in human cervical cancers. *Cancer research* 60, 916-921.
- 918 Warburg, O., Posener, K., and Negelein, E. (1924). Uber den stoffwechsel der carcinomzelle.  
919 *Biochem Z* 152, 309-344.
- 920 Ward, C., Meehan, J., Mullen, P., Supuran, C., Dixon, J.M., Thomas, J.S., Winum, J.-Y., Lambin,  
921 P., Dubois, L., Pavathaneni, N.-K., *et al.* (2015). Evaluation of carbonic anhydrase IX as a  
922 therapeutic target for inhibition of breast cancer invasion and metastasis using a series of in vitro  
923 breast cancer models.
- 924 Webb, B.A., Chimenti, M., Jacobson, M.P., and Barber, D.L. (2011a). Dysregulated pH: a perfect  
925 storm for cancer progression. *Nat Rev Cancer* 11, 671-677.
- 926 Webb, B.A., Chimenti, M., Jacobson, M.P., and Barber, D.L. (2011b). Dysregulated pH: a perfect  
927 storm for cancer progression. *Nature reviews Cancer* 11, 671-677.

- 928 Wellen, K.E., and Thompson, C.B. (2012). A two-way street: reciprocal regulation of metabolism  
929 and signalling. *Nat Rev Mol Cell Biol* *13*, 270-276.
- 930 Wonsey, D.R., Zeller, K.I., and Dang, C.V. (2002). The c-Myc target gene PRDX3 is required for  
931 mitochondrial homeostasis and neoplastic transformation. *Proc Natl Acad Sci U S A* *99*, 6649-  
932 6654.
- 933 Wu, H., Estrella, V., Beatty, M., Abrahams, D., El-Kenawi, A., Russell, S., Ibrahim-Hashim, A.,  
934 Longo, D.L., Reshetnyak, Y.K., Moshnikova, A., *et al.* (2020). T-cells produce acidic niches in  
935 lymph nodes to suppress their own effector functions. *Nature communications* *11*, 4113.
- 936 Yu, G., Yu, W., Jin, G., Xu, D., Chen, Y., Xia, T., Yu, A., Fang, W., Zhang, X., Li, Z., *et al.*  
937 (2015). PKM2 regulates neural invasion of and predicts poor prognosis for human hilar  
938 cholangiocarcinoma. *Mol Cancer* *14*, 193.

939

## Appendix: Current Author Addresses

Shonagh Russell([shonagh.russell@moffitt.org](mailto:shonagh.russell@moffitt.org))<sup>1,2</sup>,  
Liping Xu([liping.xu@moffitt.org](mailto:liping.xu@moffitt.org))<sup>1</sup>,  
Yoonseok Kam([yoonseok.kam@agilent.com](mailto:yoonseok.kam@agilent.com))<sup>9</sup>,  
Dominique Abrahams([Dominique.abrahams@moffitt.org](mailto:Dominique.abrahams@moffitt.org))<sup>1</sup>,  
Daniel Verduzco([dverduzco@mdanderson.org](mailto:dverduzco@mdanderson.org))<sup>3</sup>,  
Joseph Johnson([joseph.johnson@moffitt.org](mailto:joseph.johnson@moffitt.org))<sup>10</sup>,  
Tamir Epstein([tamir.epstein@gmail.com](mailto:tamir.epstein@gmail.com))<sup>7</sup>,  
Epifanio Ruiz([epifanio.ruiz@moffitt.org](mailto:epifanio.ruiz@moffitt.org))<sup>4</sup>,  
Mark C. Lloyd([MLloyd@inspirata.com](mailto:MLloyd@inspirata.com))<sup>6</sup>,  
Jonathan Wojtkowiak([wojtkow2@gmail.com](mailto:wojtkow2@gmail.com))<sup>1</sup>,  
Alex S. Lopez([alexis.lopez@moffitt.org](mailto:alexis.lopez@moffitt.org))<sup>5</sup>,  
Marilyn M. Bui([marilyn.bui@moffitt.org](mailto:marilyn.bui@moffitt.org))<sup>5,10</sup>  
Robert J. Gillies([Robert.gillies@moffitt.org](mailto:Robert.gillies@moffitt.org))<sup>1\*</sup>  
Pawel Swietach ([pawel.swietach@dpag.ox.ac.uk](mailto:pawel.swietach@dpag.ox.ac.uk))  
Bryce Ordway ([Bryce.ordway@moffitt.org](mailto:Bryce.ordway@moffitt.org))

Shonagh Russell, [liping.xu@moffitt.org](mailto:liping.xu@moffitt.org), [yoonseok.kam@agilent.com](mailto:yoonseok.kam@agilent.com),  
[Dominique.abrahams@moffitt.org](mailto:Dominique.abrahams@moffitt.org), [dverduzco@mdanderson.org](mailto:dverduzco@mdanderson.org), [joseph.johnson@moffitt.org](mailto:joseph.johnson@moffitt.org),  
[tamir.epstein@gmail.com](mailto:tamir.epstein@gmail.com), [epifanio.ruiz@moffitt.org](mailto:epifanio.ruiz@moffitt.org), [MLloyd@inspirata.com](mailto:MLloyd@inspirata.com),  
[wojtkow2@gmail.com](mailto:wojtkow2@gmail.com), [alexis.lopez@moffitt.org](mailto:alexis.lopez@moffitt.org), Alex S. Lopez([alexis.lopez@moffitt.org](mailto:alexis.lopez@moffitt.org))<sup>5</sup>,  
[marilyn.bui@moffitt.org](mailto:marilyn.bui@moffitt.org), [Robert.gillies@moffitt.org](mailto:Robert.gillies@moffitt.org), [pawel.swietach@dpag.ox.ac.uk](mailto:pawel.swietach@dpag.ox.ac.uk),  
[Bryce.ordway@moffitt.org](mailto:Bryce.ordway@moffitt.org)

<sup>1</sup>*Cancer Physiology, Moffitt Cancer Center, 12902 Magnolia Dr, Tampa, 33612, FL, USA*

<sup>2</sup>*University of South Florida, 4202 E Fowler Ave, Tampa, 33620, FL, USA*

<sup>3</sup>*MD Anderson*  
<sup>4</sup>*Small Animal Imaging Department, Moffitt Cancer Center, 12902 USF Magnolia Dr, Tampa, 33612, FL, USA*

<sup>5</sup>*Anatomic Pathology, Moffitt Cancer Center, 12902 USF Magnolia Dr, Tampa, 33612, Fl, USA*

<sup>6</sup>*Inspirata, Inc. One North Dale Mabry Hwy. Suite 600 Tampa, FL 33609*

<sup>7</sup>*Mariotteplein 42, 1098PA, Amsterdam, the Netherlands*



*<sup>8</sup>Genentech, 1 DNA Way Mailstop 258A, South San Francisco, CA 94080, USA*

*<sup>9</sup>Agilent Technologies, 5301 Stevens Creek Blvd, Santa Clara, CA 9505, USA*

*<sup>10</sup>Analytic Microscopy Core, Moffitt Cancer Center, 12902 USF Magnolia Dr, Tampa, 33612, FL, USA*

# Supplementary Tables (S1,S2) And Figures (S1 - S24)

Raw western blots

Matlab code

# Supplementary Table 1

| pHe | pHi     |        |         |         |         |         |
|-----|---------|--------|---------|---------|---------|---------|
|     | MCF7    |        | M1      |         | M6      |         |
|     | Average | SD     | Average | SD      | Average | SD      |
| 6.4 | 6.78    | 0.1966 | 6.78    | 0.178   | 6.75    | 0.1859  |
| 6.8 | 6.88    | 0.1459 | 6.93    | 0.1224  | 6.97    | 0.08992 |
| 7.1 | 6.98    | 0.1262 | 7.04    | 0.08474 | 7.04    | 0.09440 |
| 7.4 | 7.05    | 0.1517 | 7.04    | 0.09170 | 7.03    | 0.07948 |

**Supplementary Table 1:** Average intracellular pHi in control and CA-IX expressing MCF-7 cells as a function of extracellular pH. n=158-438 cells , standard deviation shown.

# Supplementary Table 2

| Mouse Model | Experimental Metastasis  | Spontaneous Metastasis   |
|-------------|--------------------------|--------------------------|
|             | # of mice with lung mets | # of mice with lung mets |
| Group ID    |                          |                          |
| MCF7/PMA-1  | 7/12 (58%)               | 4/9 (44%)                |
| MCF7/MOCK-1 | 1/10 (10%)               | 1/10 (10%)               |
| P-Value     | 0.03*                    | 0.14 (n.s.)              |

**Supplementary Table 2:** Effect of PMA1 expression on experimental and spontaneous metastasis in MCF-7 cells. (Two-tailed Fisher's exact t-test  $p < 0.05^*$ )

# Supplementary Fig. 1

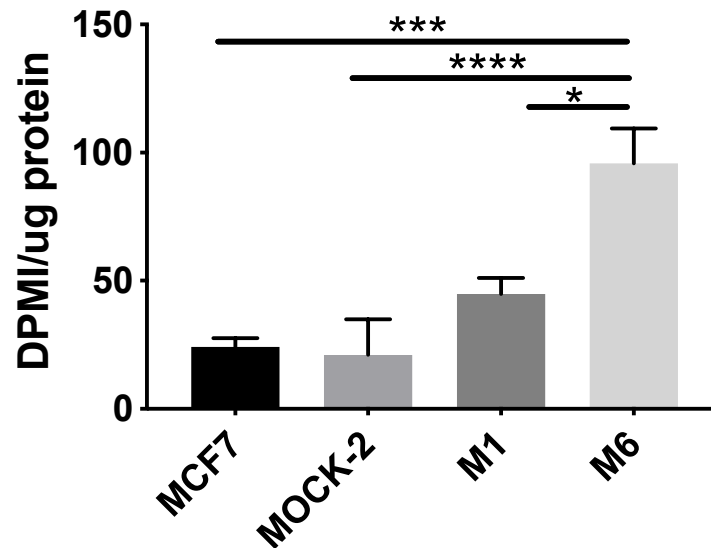

**Supplementary Fig. 1.** Uptake of <sup>3</sup>H-2-deoxy glucose in control and CAIX MCF-7 clones (N=3; Ordinary one-way ANOVA \*, \*\*\*, \*\*\*\* p<0.05, 0.005, 0.001)

# Supplementary Fig. 2

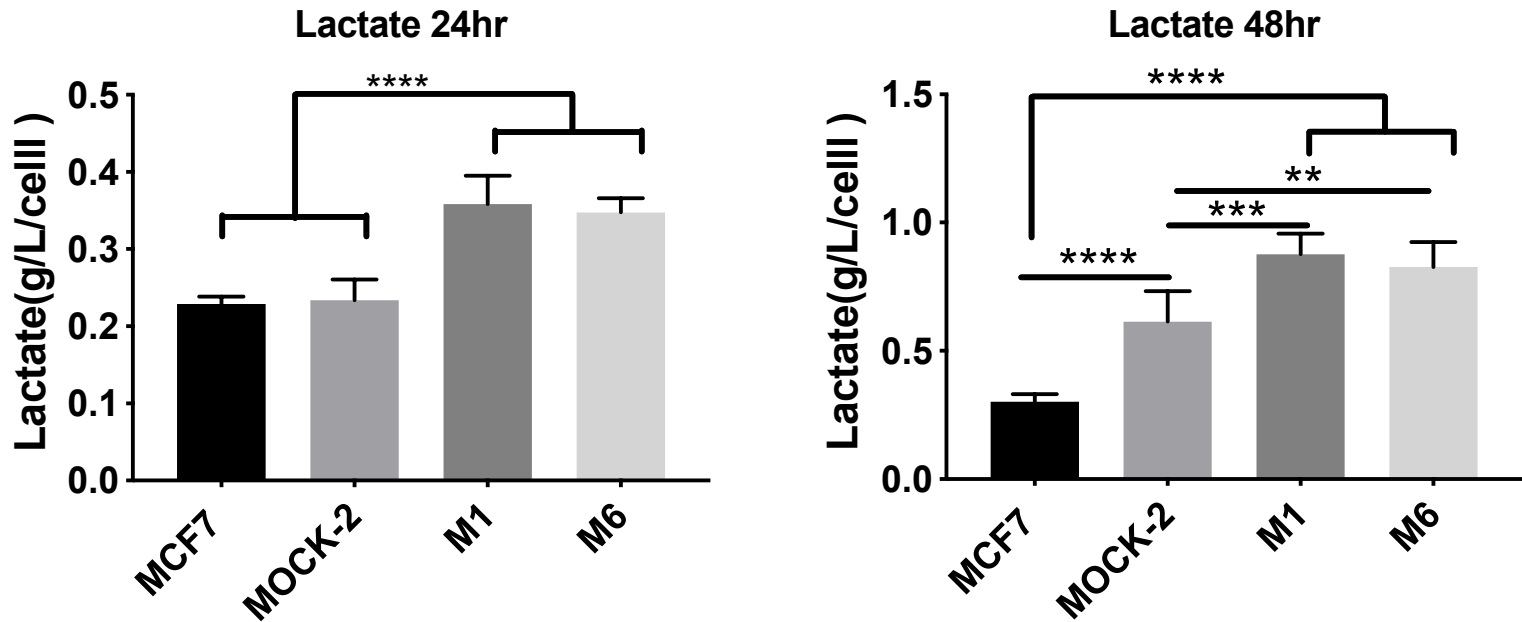

**Supplementary Fig. 2.** YSI analysis of lactate in media at 24 and 48 hours in CA-IX clones (N=6 replicates, Ordinary one-way ANOVA  $p < 0.01$  \*\*,  $0.005$ \*\*\*,  $0.001$ \*\*\*\*.)

# Supplementary Fig. 3

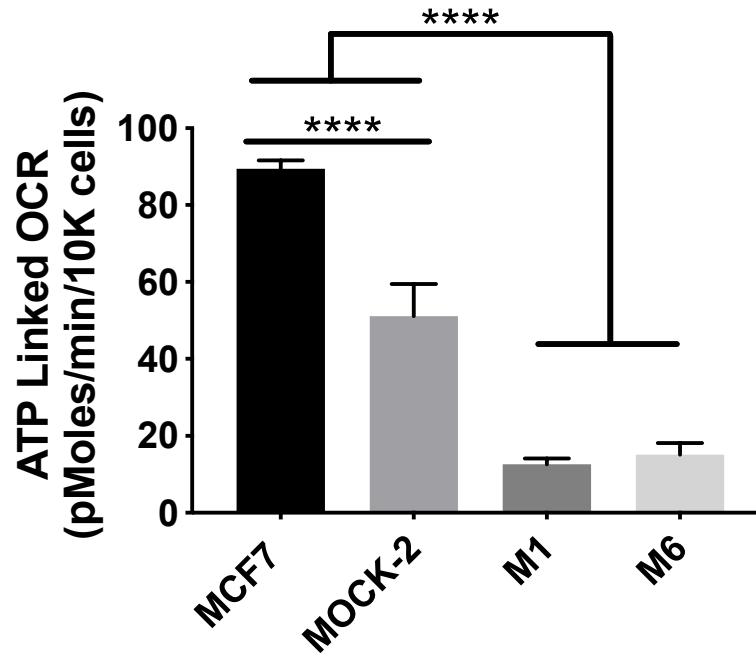

**Supplementary Fig. 3.** ATP linked OCR measured by mitochondrial stress test XFe96 Seahorse assay, by injecting oligomycin to shut off mitochondrial respiration. (N=8 replicates, ordinary one-way ANOVA  $p < 0.001$ \*\*\*\*.)

# Supplementary Fig. 4

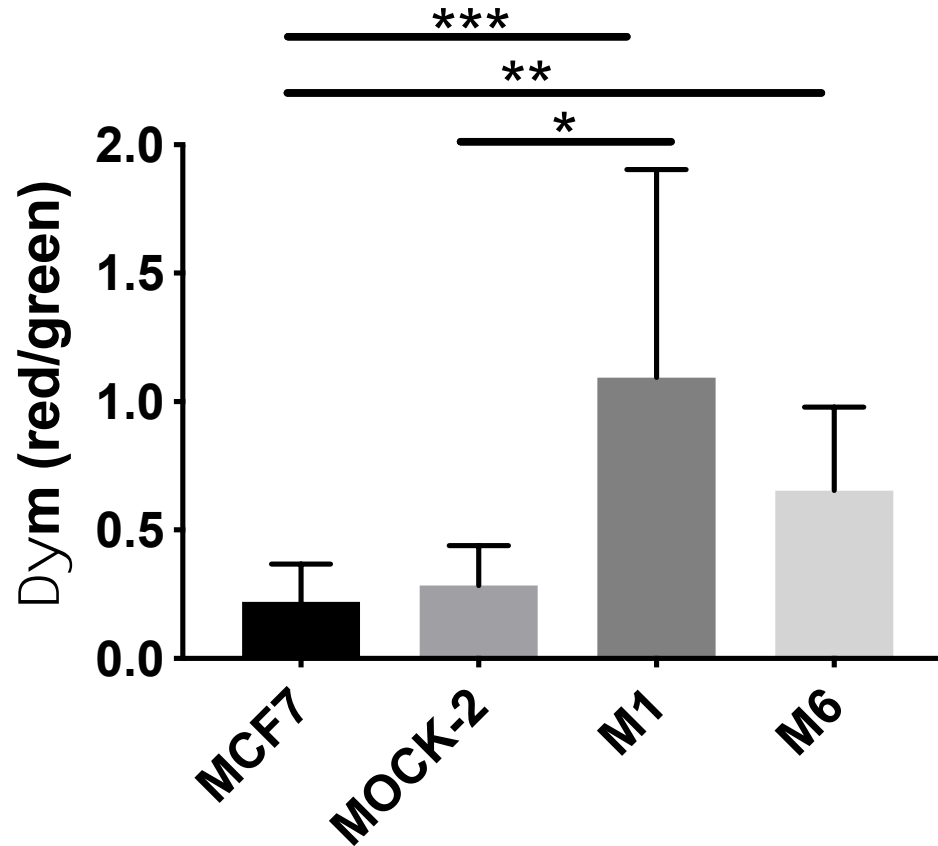

**Supplementary Fig. 4.** Mitochondrial polarization using JC-1 mitochondrial dye in CA-IX clones (N=8-12 per group, 2 bioreplicates; Kriskal Wallis Test  $p < 0.05^*$ ,  $p < 0.01^{**}$ ,  $p < 0.005^{***}$ )



# Supplementary Fig. 5

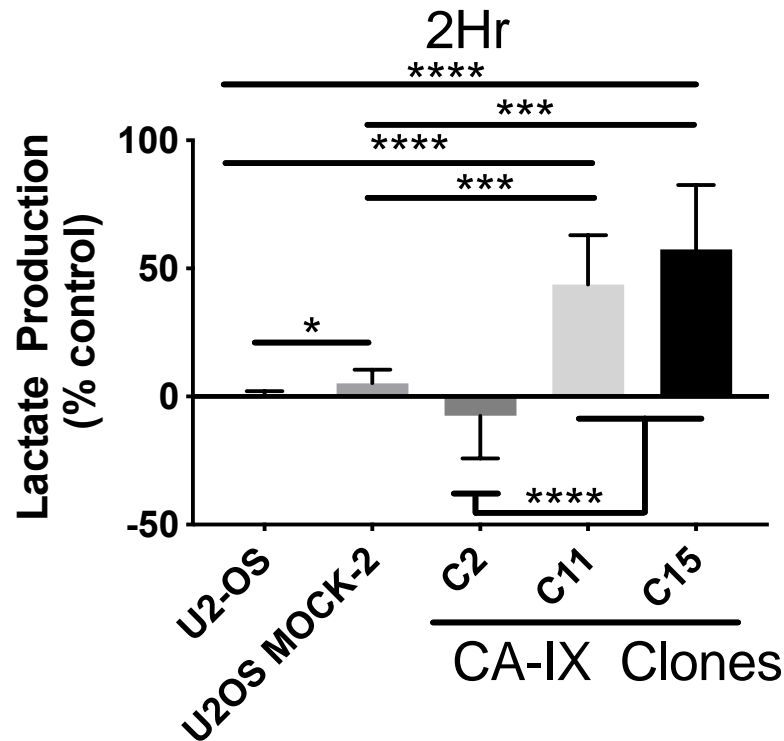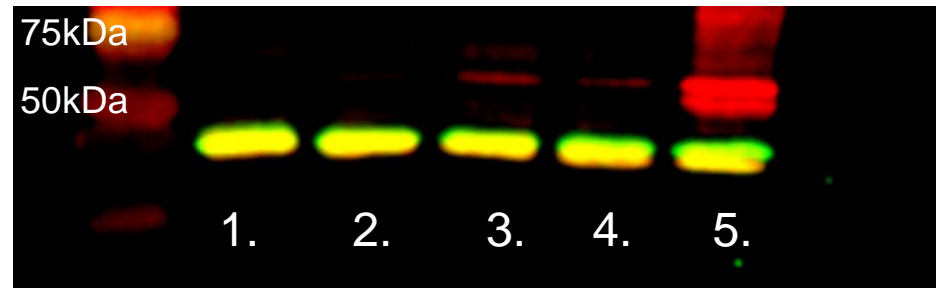

Red- CA-IX  
Green - GAPDH

Order of gel ladder  
1. U2-os  
2. U2-os Mock  
3. U2-os C2 CA-IX  
4. U2-os C11 CA-IX  
5. U2-os C15 CA-IX

**Supplementary Fig. 5.** U2OS Lactate production rates and CA-IX western blot (N=12; Brown Forsythe and Welch ANOVA,  $p < 0.05^*$ ,  $p < 0.01^{**}$ ,  $p < 0.005^{***}$ ,  $p < 0.001^{****}$ .)

# Supplementary Fig. 6

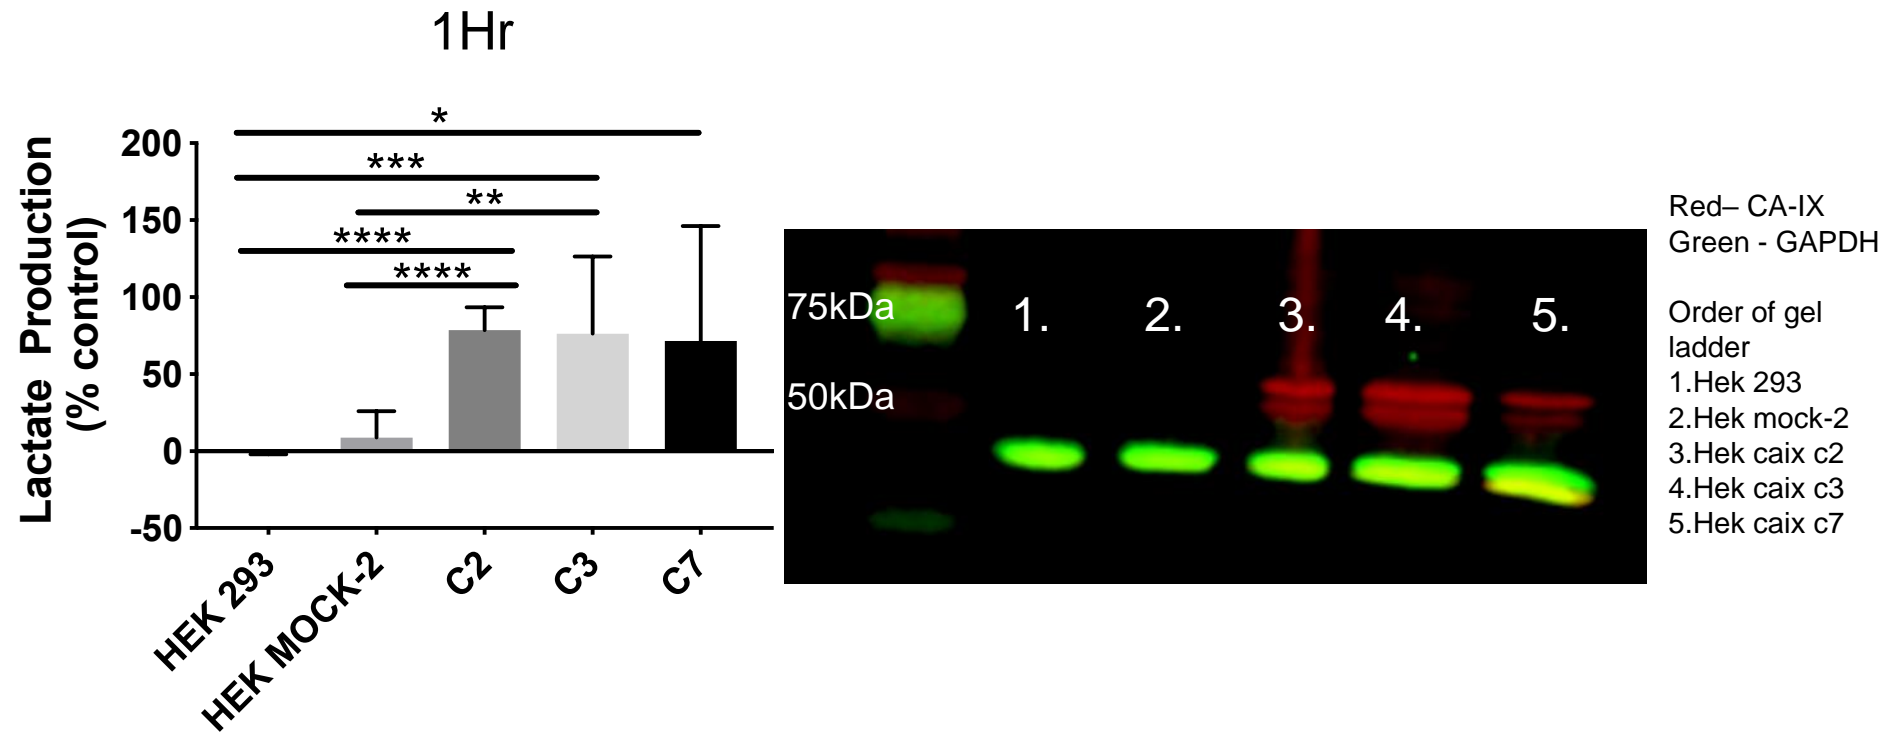

**Supplementary Fig. 6.** Lactate production and Western blot of CA-IX transfected HEK 293T cells. (N=15; Brown Forsythe and Welch ANOVA,  $p < 0.05^*$ ,  $p < 0.01^{**}$ ,  $p < 0.005^{***}$ ,  $p < 0.001^{****}$ .)

# Supplementary Fig. 7

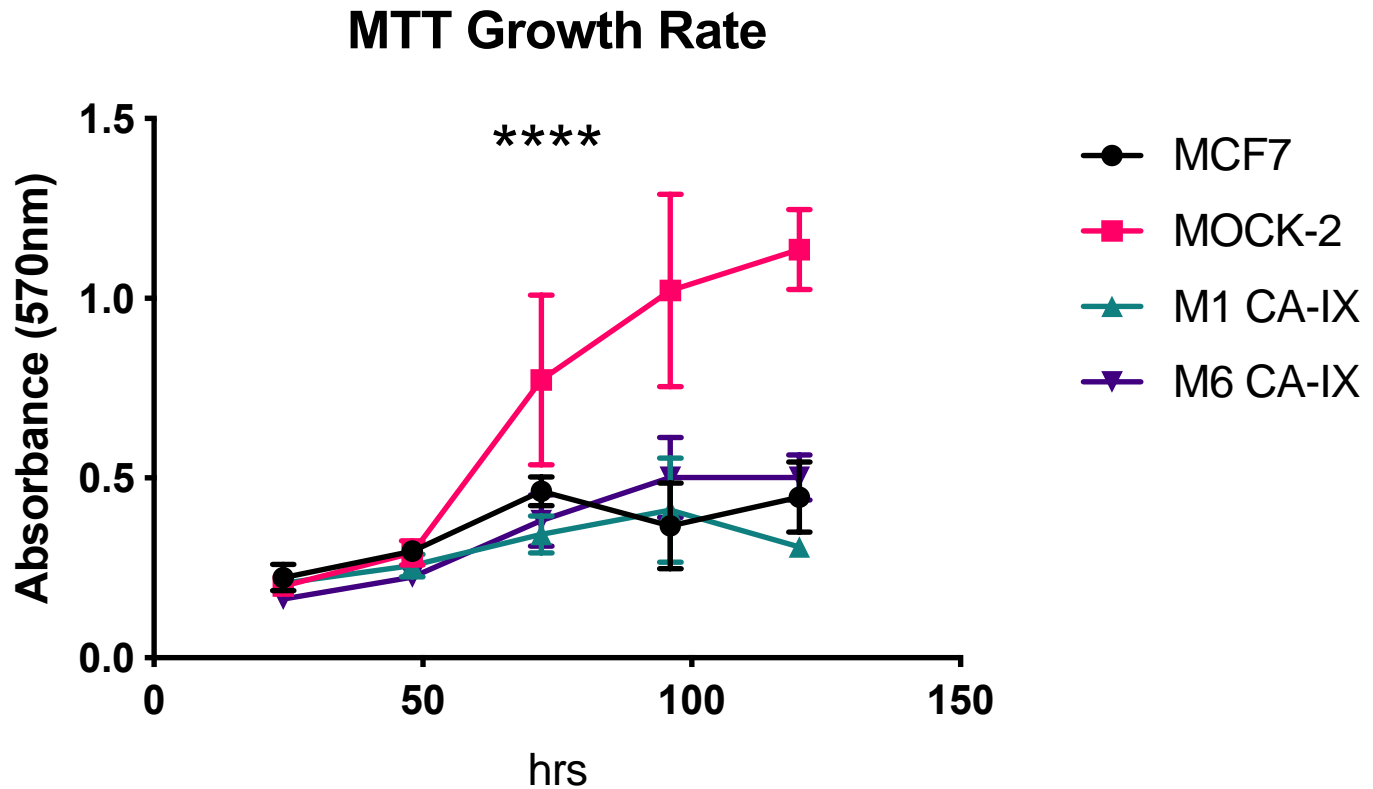

**Supplementary Fig 7.** In vitro growth rates of MCF-7, MOCK-2 and CA-IX clones M1 and M6.  $n=3$ , average  $\pm$  SD.  $p<0.0001$ \*\*\*\*.

# Supplementary Fig. 8

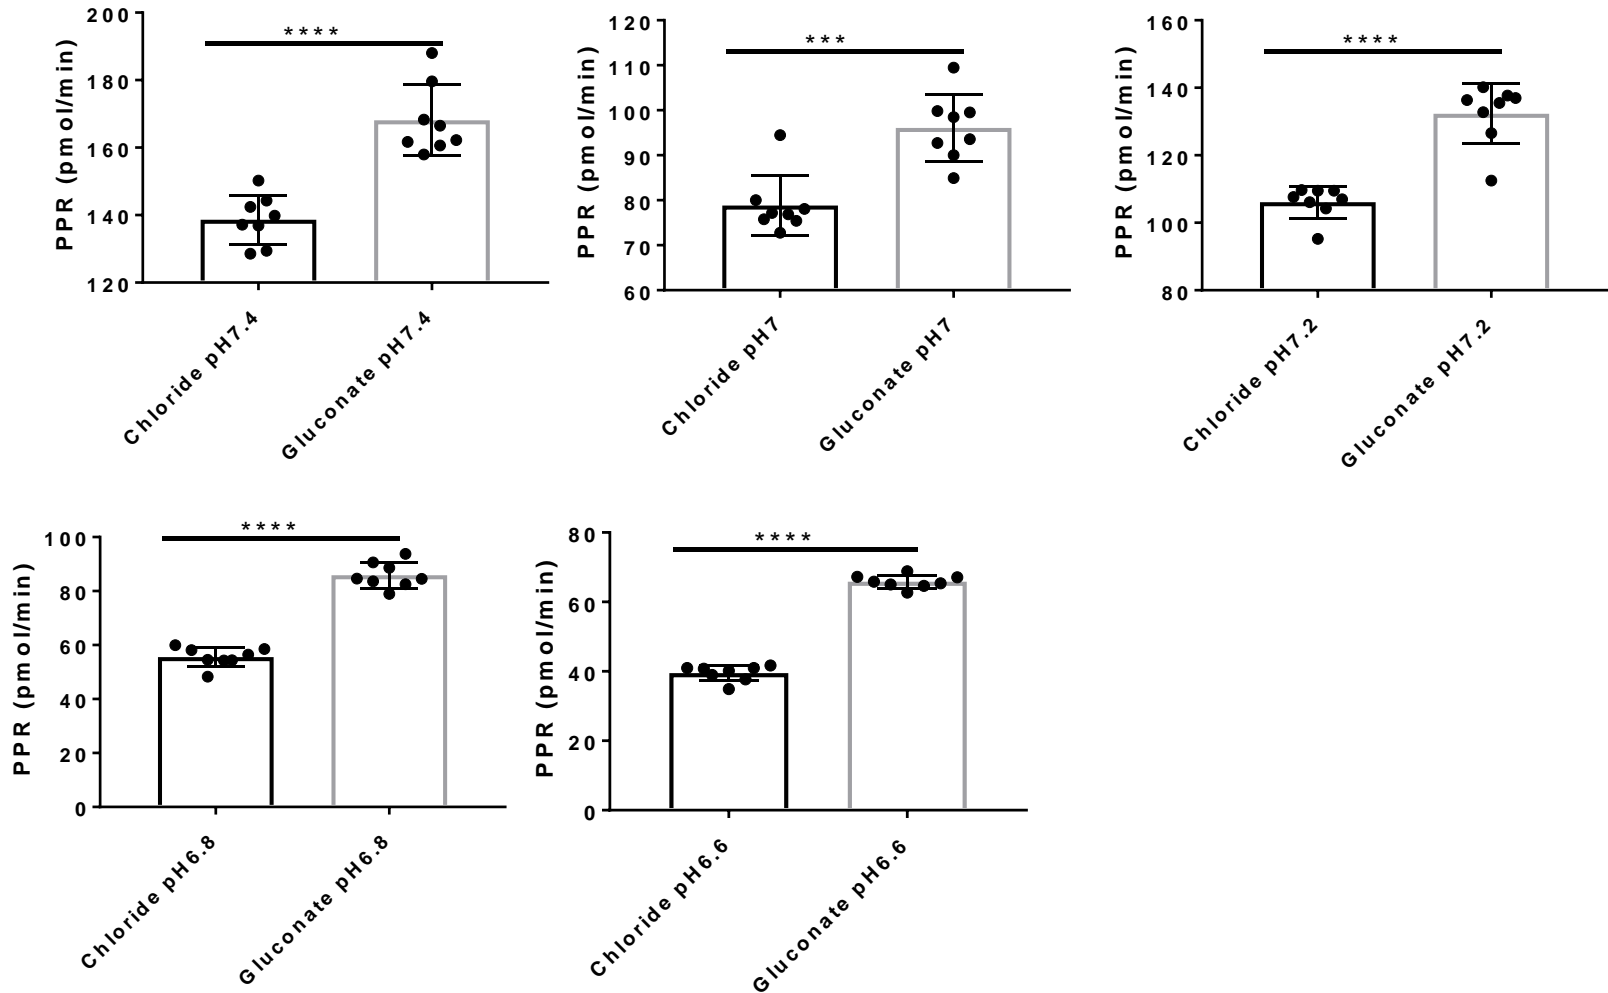

**Supplementary Fig. 8.** Effect of chloride vs gluconate on PPR. Average PPR  $\pm$  SD, n=8, unpaired t-test  $p < 0.005$ \*\*\*,  $p < 0.0001$ \*\*\*\*.

# Supplementary Fig. 9

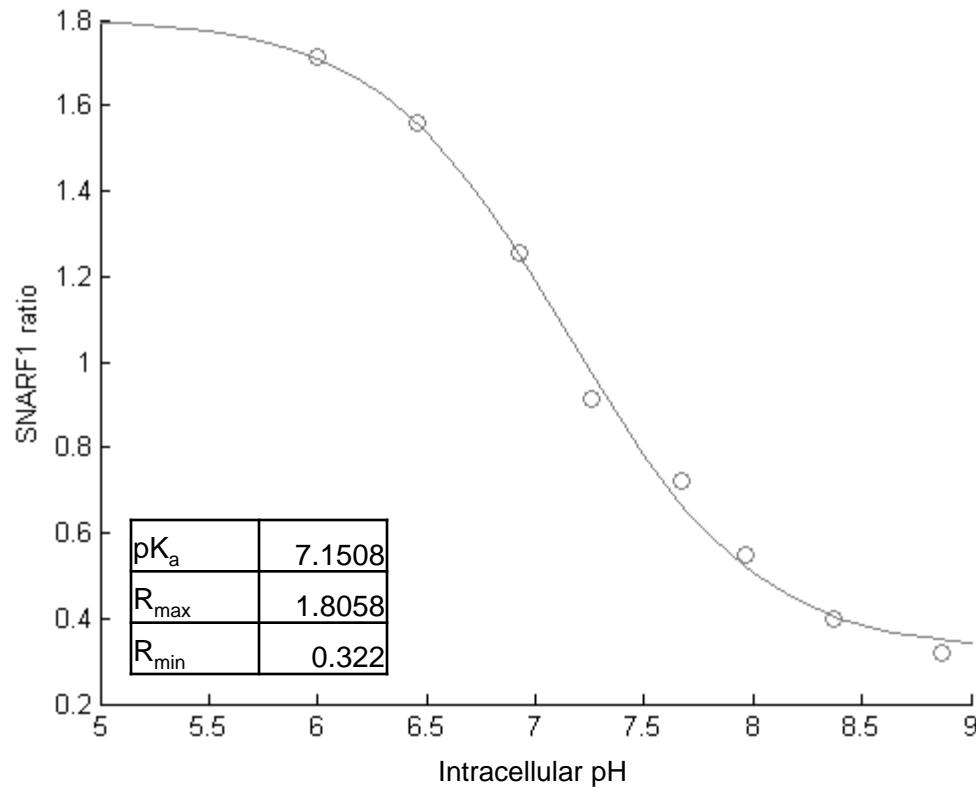

**Supplementary Fig. 9.** cSNARF1 calibration curve with nigericin/high  $K^+$

# Supplementary Fig.10

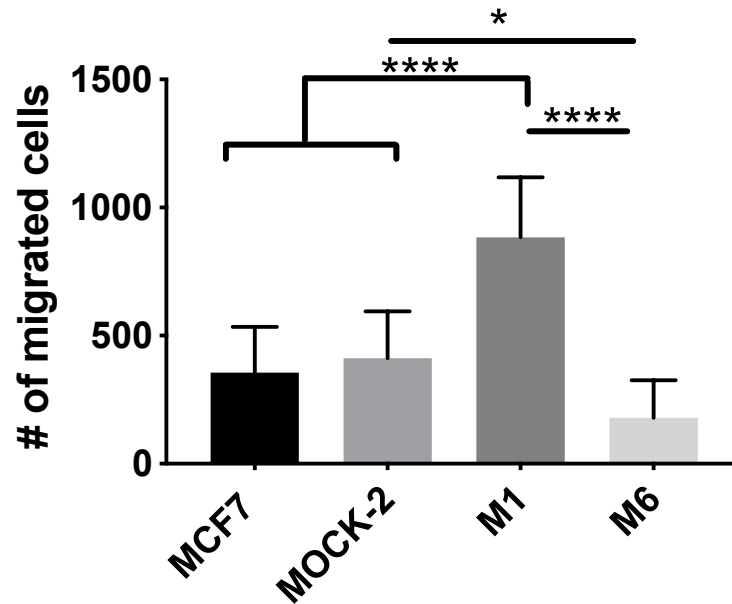

**Supplementary Fig. 10.** Migration assay to measure effects of CA-IX expression on migration of MCF7 cells. Imaged using Celigo, n=3 bio-replicates in triplicate, average  $\pm$  SD. (Ordinary one-way ANOVA,  $p < 0.05^*$ ,  $p < 0.005^{***}$ ,  $p < 0.0001^{****}$ )

# Supplementary Fig. 11

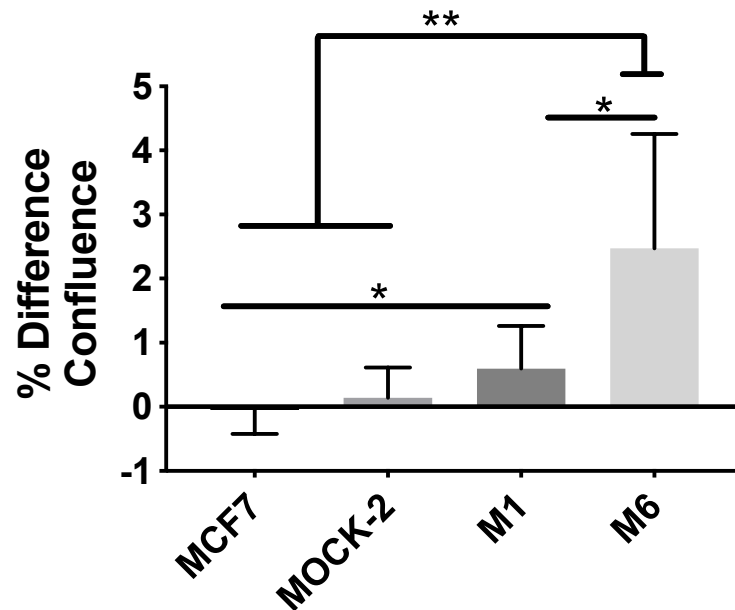

**Supplementary Fig. 11.** Gel escape assay to measure effects of CA-IX expression on invasion and migration in MCF7 cells. Imaged using Celigo, n=3 bio-replicates in triplicate, average  $\pm$  SD. (Brown-Forsythe and Welch ANOVA,  $p < 0.0001$ \*\*\*\*)

# Supplementary Fig. 12

MCF-7

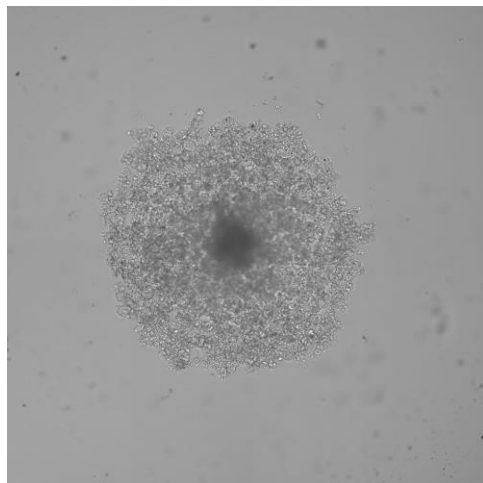

MOCK-2

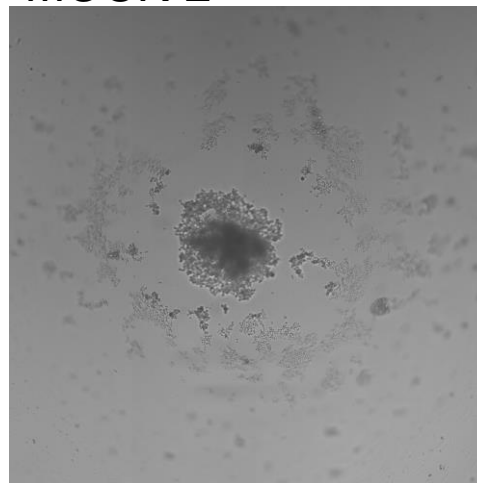

M1 CA-IX

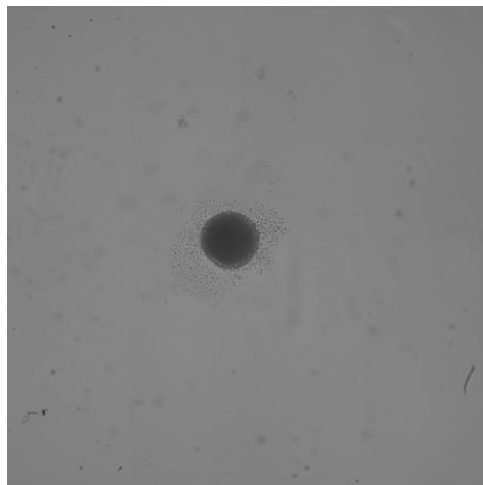

M6 CA-IX

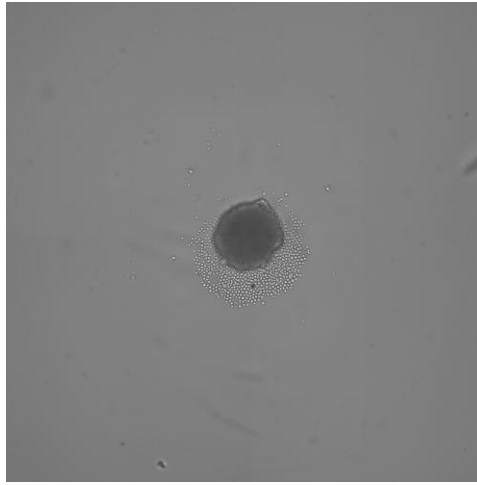

**Supplementary Fig. 12.** Spheroid formation assay to measure ability of cells to grow in 3D, an indicator of metastatic ability *in vitro*. Imaged using Celigo with single colony verification analysis after 5 days of growth in hanging drop plates. Representative images shown.



# Supplementary Fig. 13

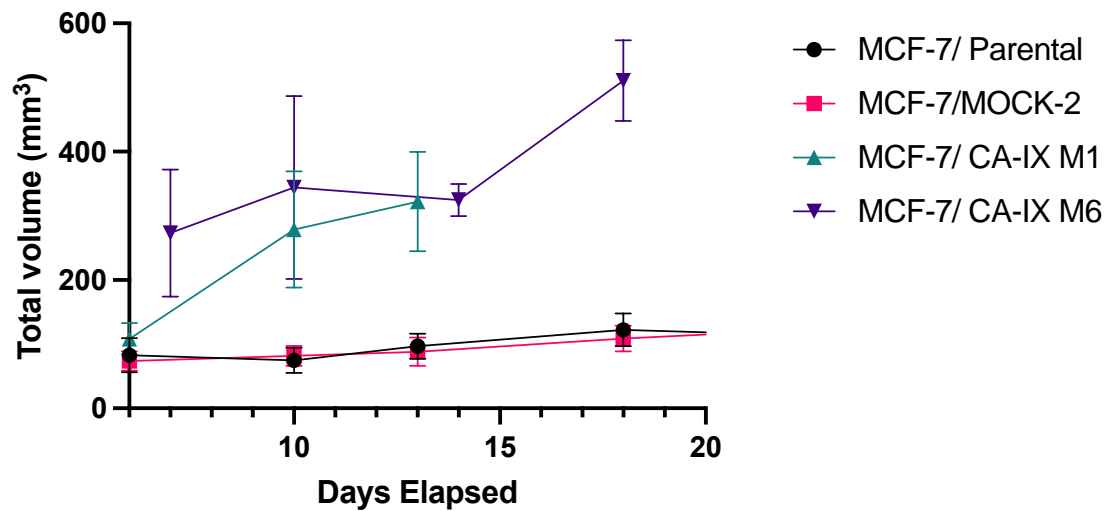

**Supplementary Figure 13:** Effect of CA-IX expression on primary tumor growth of MCF-7 cells. n=12-15 mice per group

# Supplementary Fig. 14

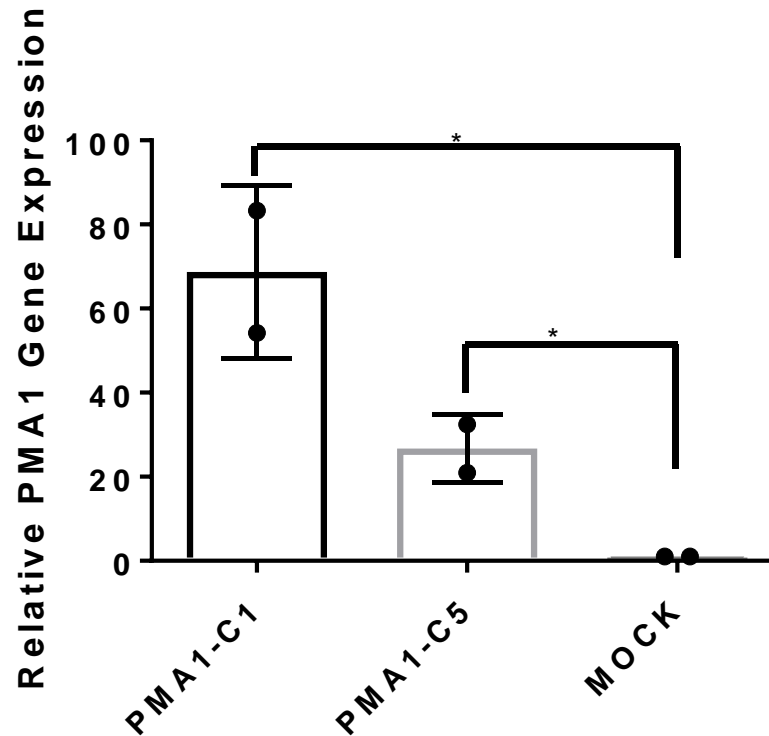

**Supplementary Fig. 14.** qRT PCR of relative PMA1 gene expression in PMA1 transfected clones compared to MOCK (empty vector clone). Average  $\pm$  SD. (Ordinary one-way ANOVA.  $p < 0.05^*$ )

# Supplementary Fig. 15

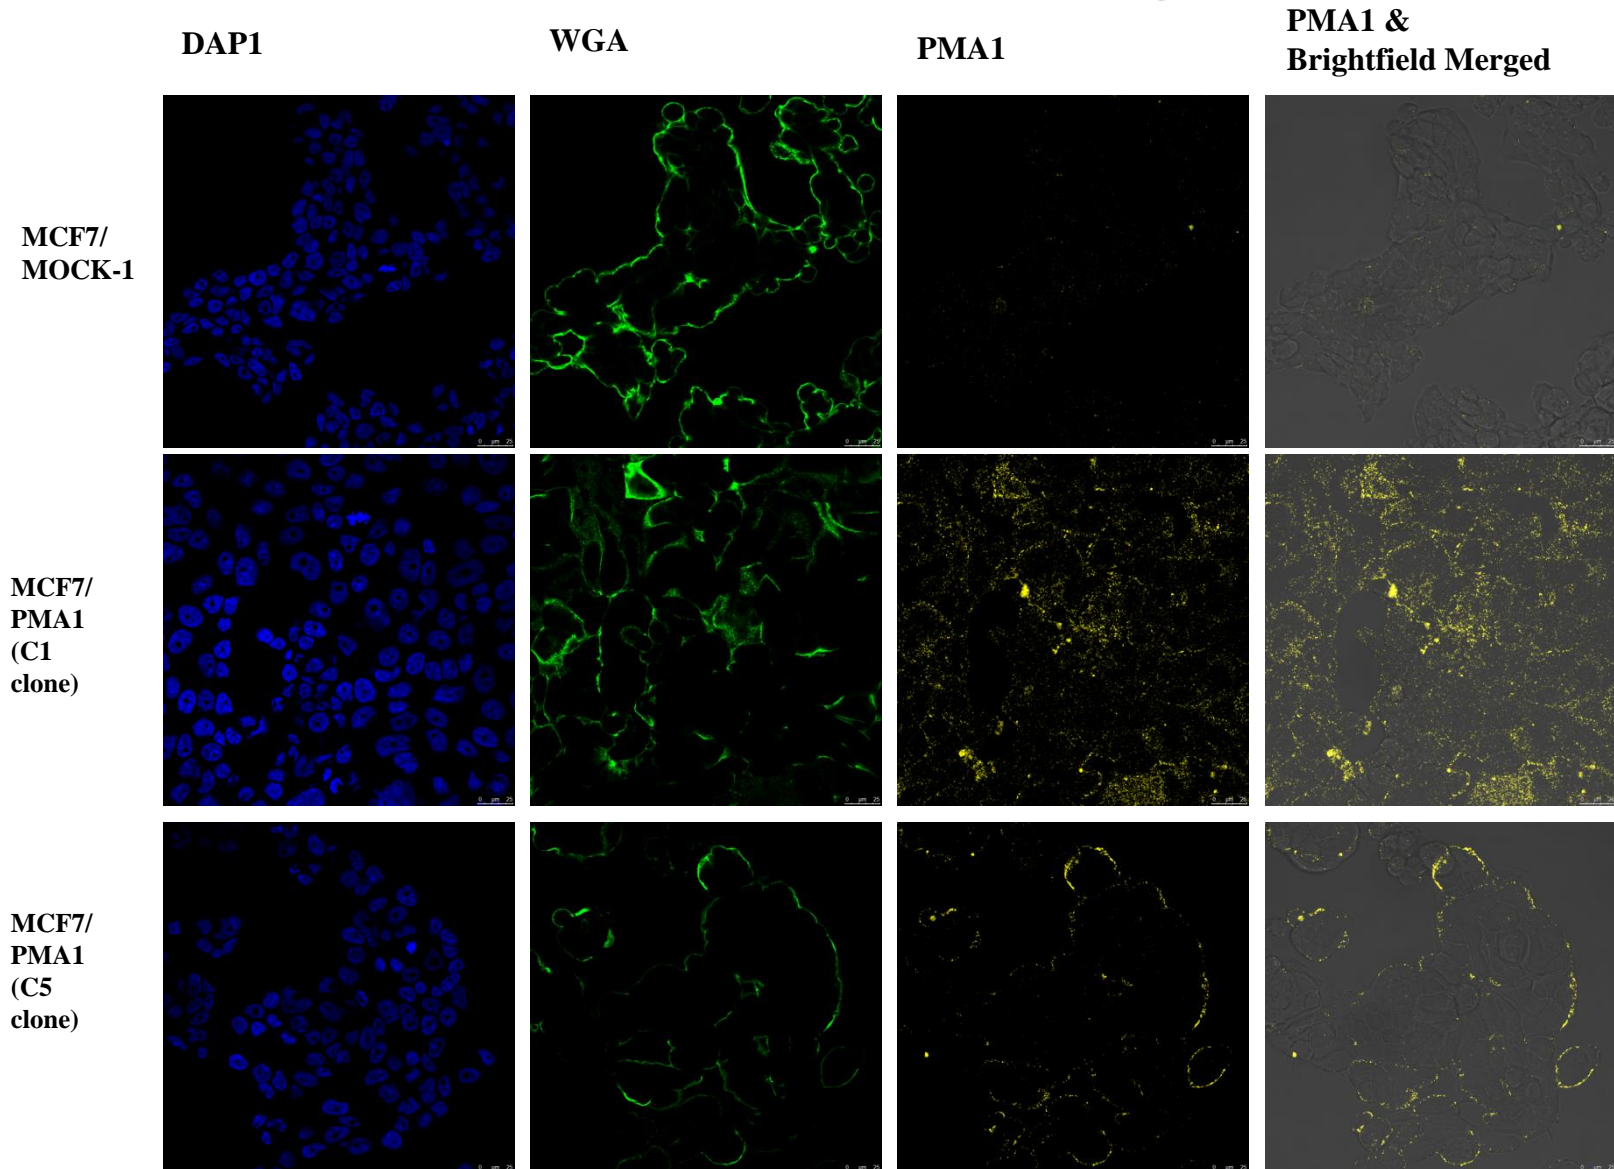

**Supplementary Fig. 15.** Characterization of PMA1-expressing cells by ICC staining (non-permeabilized) DAPI (blue), WGA (green), PMA1 (Alexa Fluor 594 red)

# Supplementary Fig. 16

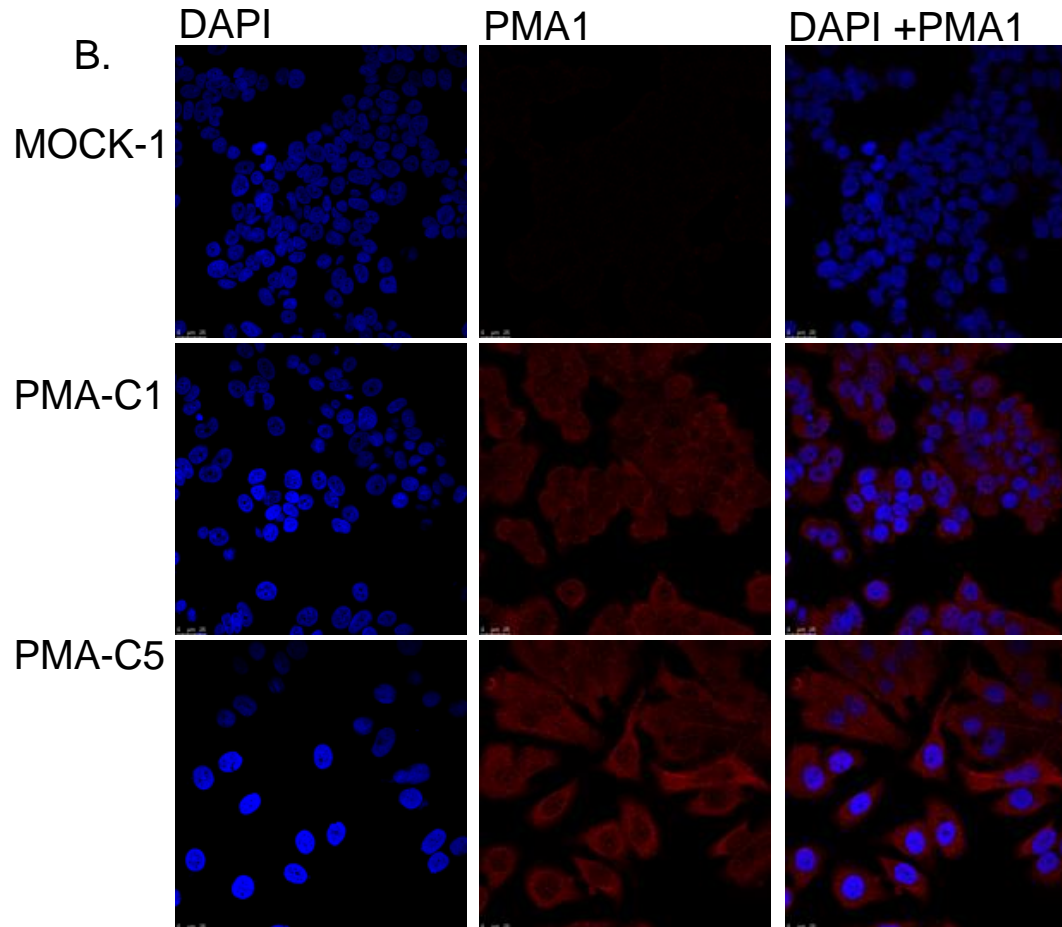

**Supplementary Fig. 16.** ICC of permeabilized cells staining for PMA1.

PMA in red and Nuclear stain DAPI in blue.

# Supplementary Fig. 17

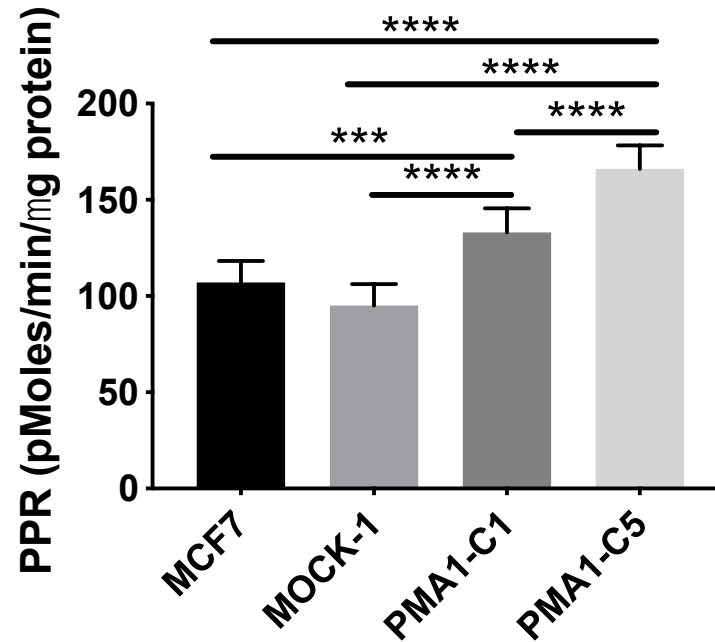

**Supplementary Fig. 17.** Glycolytic reserve measured by glycolysis stress test with XFe96 Seahorse assay. Reserve is determined by difference in glucose-stimulated proton production rate (PPR) and addition of oligomycin which inhibits mitochondrial energy production. Average  $\pm$  SD. (Ordinary one-way ANOVA.  $p < 0.0005$ \*\*\*,  $p < 0.0001$ \*\*\*\*)

# Supplementary Fig. 18

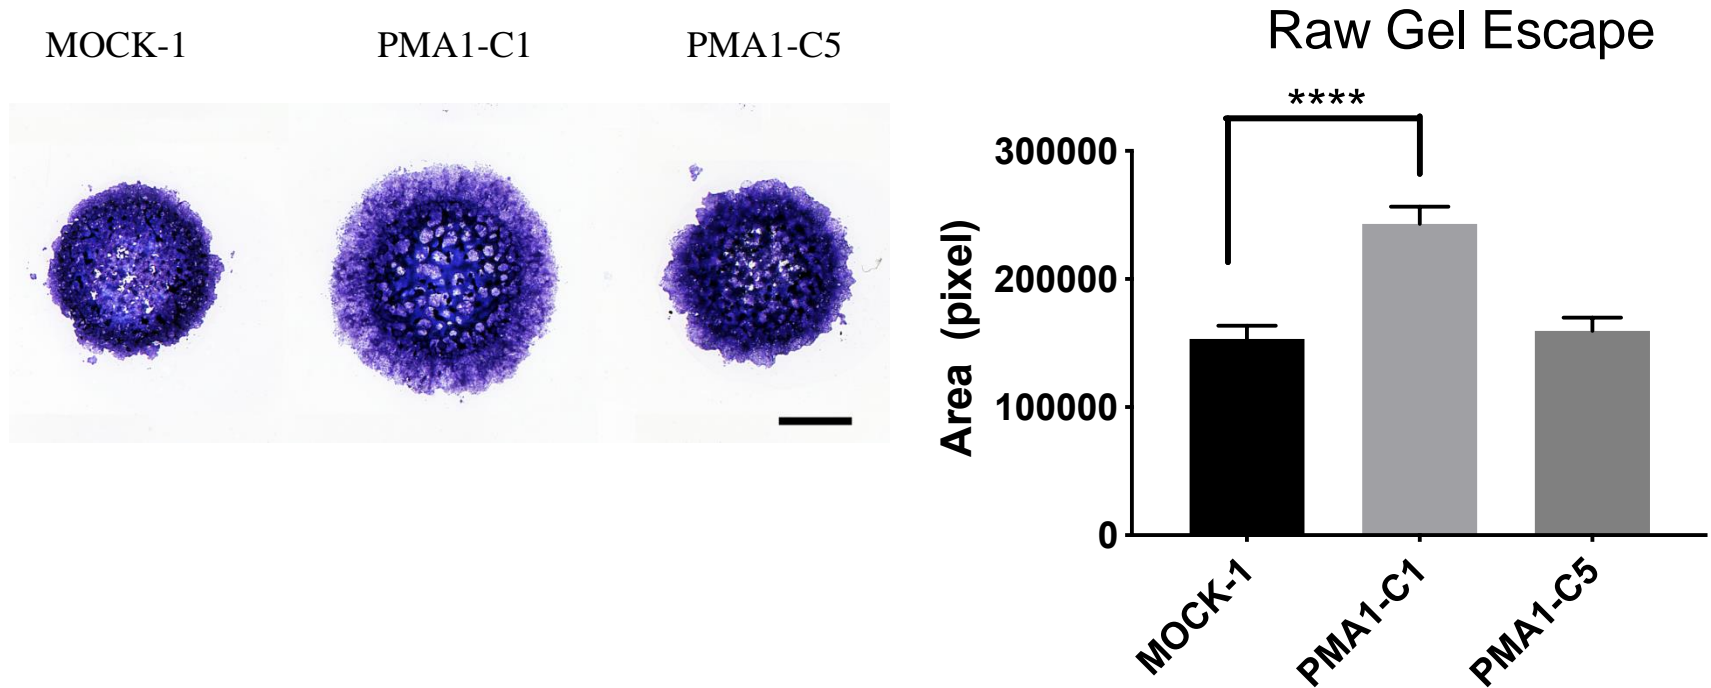

**Supplementary Fig. 18.** Raw data of gel escape assay and corresponding images, prior to normalization by growth rate. N=4 biological replicates, average  $\pm$  SD. (Ordinary one-way ANOVA,  $p < 0.0001$ \*\*\*\*)

# Supplementary Fig. 19

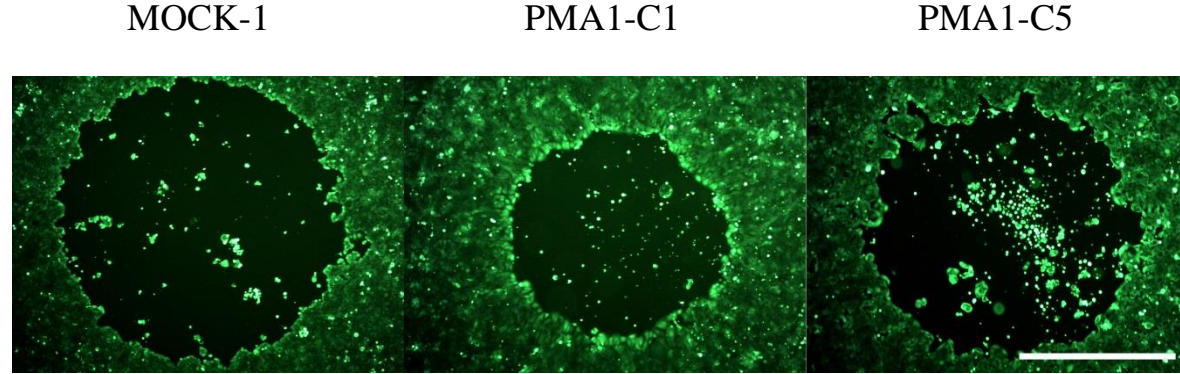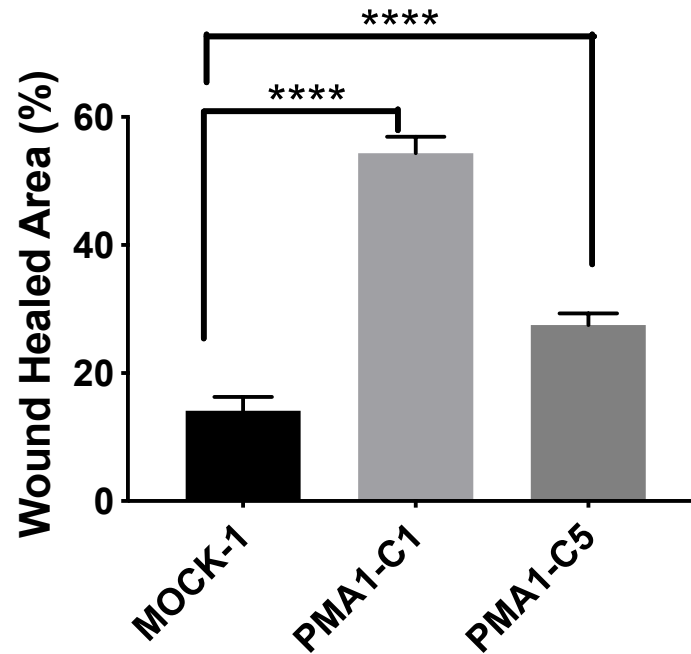

**Supplementary Fig. 19.** Raw data of circular wound healing assay and corresponding images, prior to normalization by growth rate. N=4 biological replicates, average  $\pm$  SD. (Ordinary one-way ANOVA,  $p < 0.0001$ \*\*\*\*)

# Supplementary Fig. 20

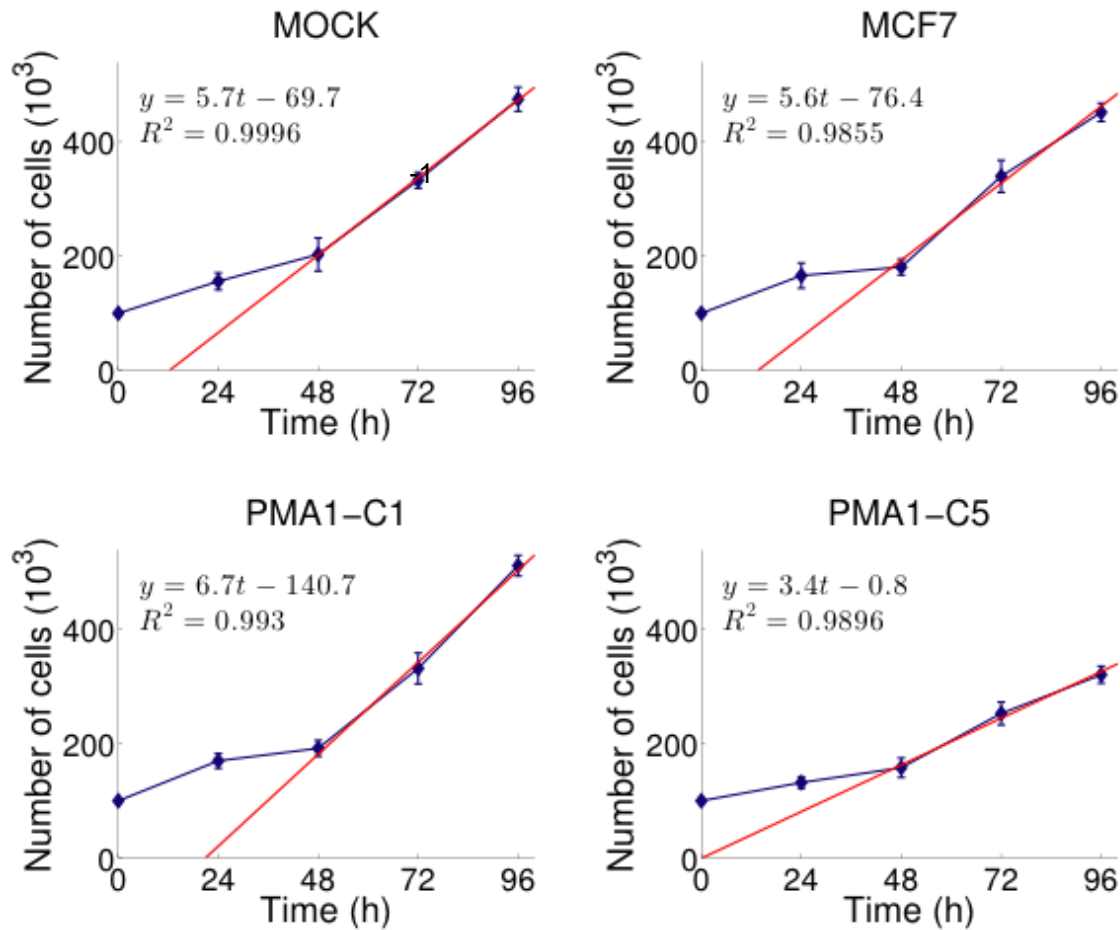

**Supplementary Fig. 20.** Cellular growth rate was determined by number of cells over time and calculated by a linear fit of cell growth for normalization of invasion and migration assays



# Supplementary Fig. 21

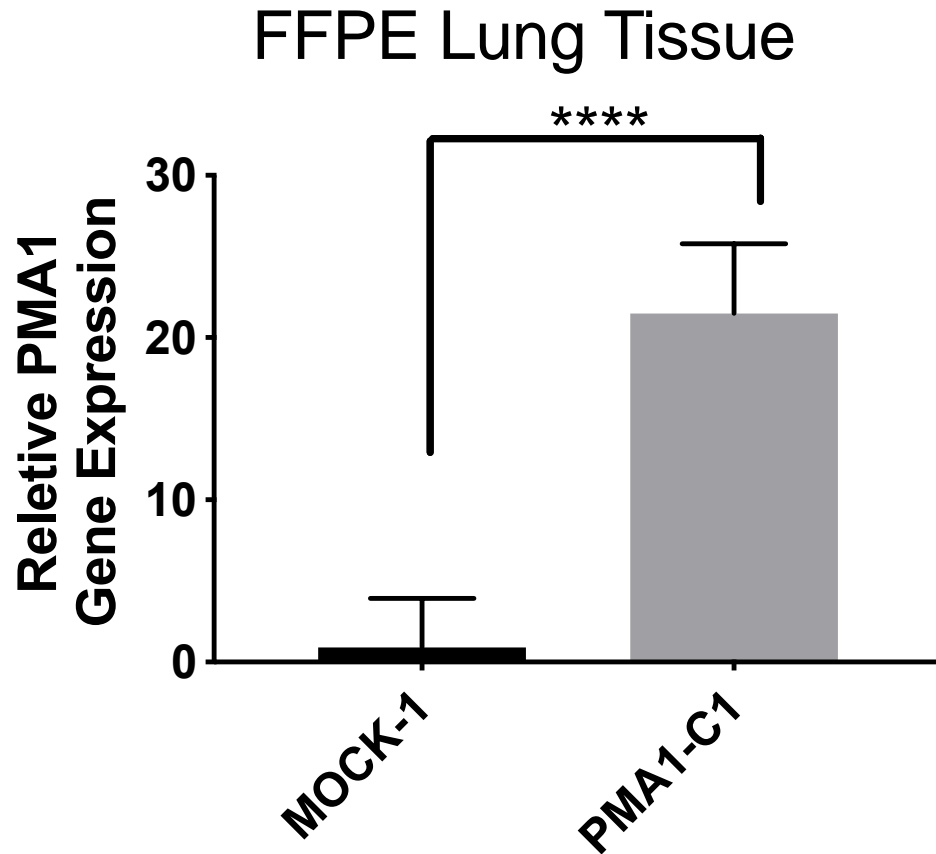

**Supplementary Fig. 21.** Relative PMA1 gene expression in lung micrometastases. Average relative gene expression  $\pm$  SD, unpaired t-test  $p < 0.0001$ .

# Supplementary Fig. 22

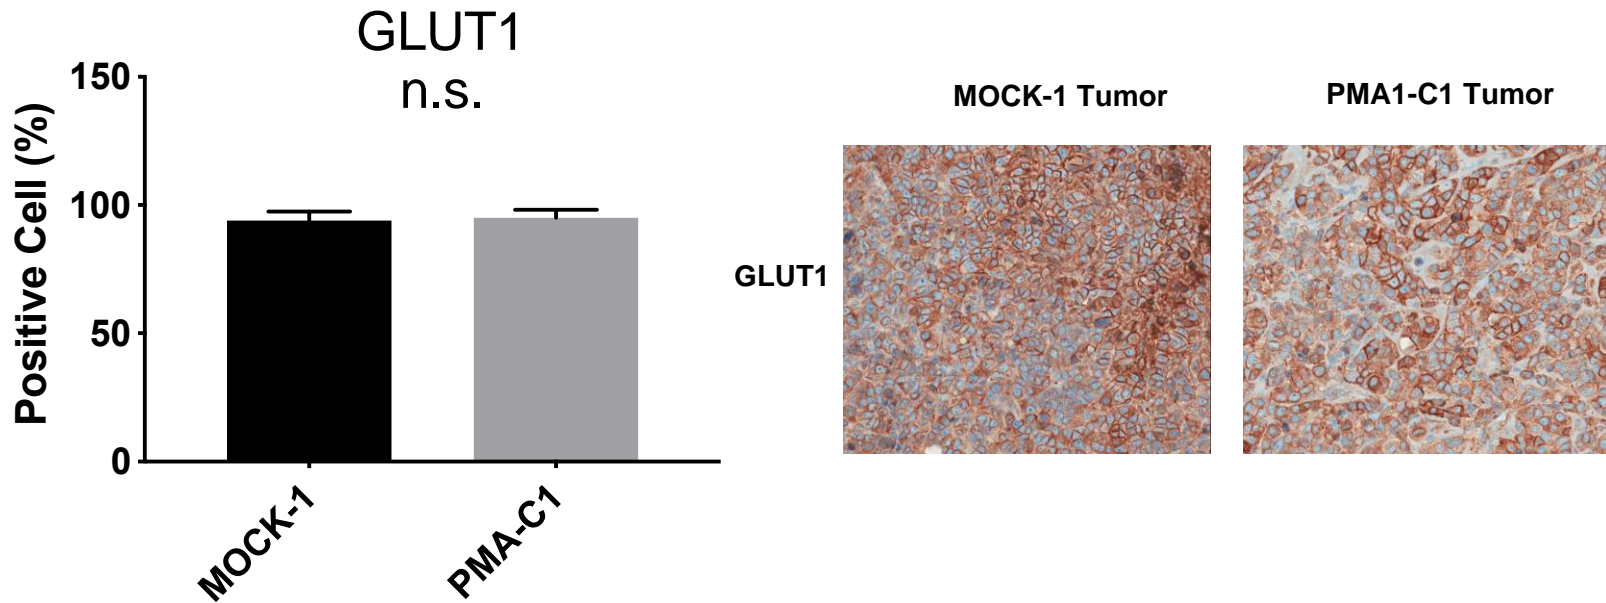

**Supplementary Fig. 22.** Quantification of GLUT1 protein staining in IHC samples of resected primary tumors and representative images. N=9-10, Average  $\pm$  SD, unpaired t-test n.s.

# Supplementary Fig. 23

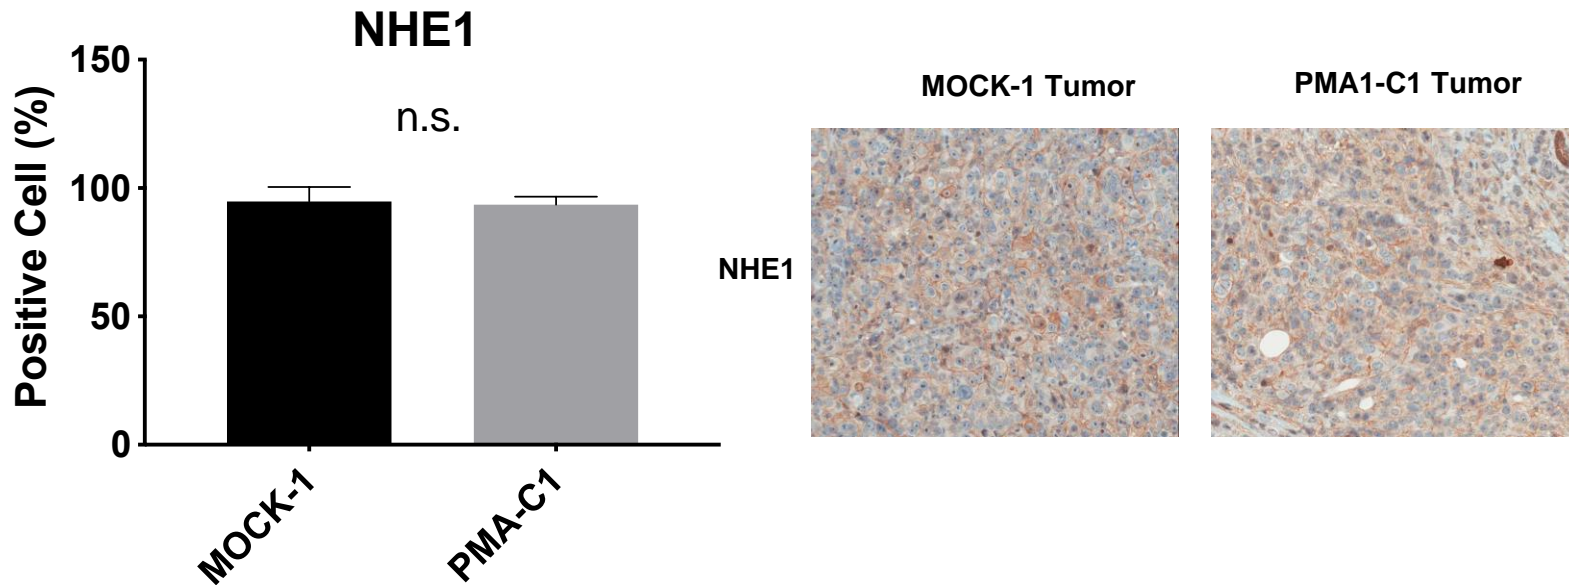

**Supplementary Fig. 23.** Quantification of NHE1 protein staining in IHC samples of resected primary tumors and representative images, n=8-9 Average  $\pm$  SD, unpaired t-test n.s.

# Supplementary Fig. 24

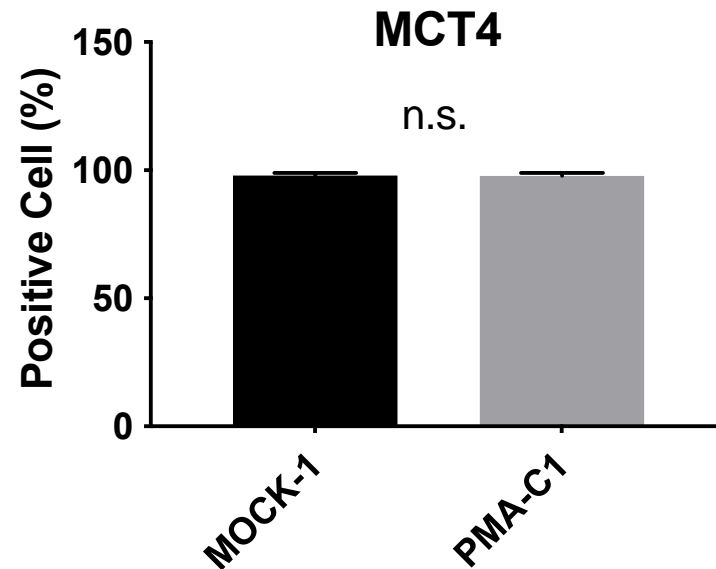

**Supplementary Fig. 24.** Quantification of MCT4 protein staining in IHC samples of resected primary tumors and representative images, n=8-9 Average  $\pm$  SD, unpaired t-test n.s.

# Raw western blots

Ladder mcf7 Mck-2 m1 m6 m6

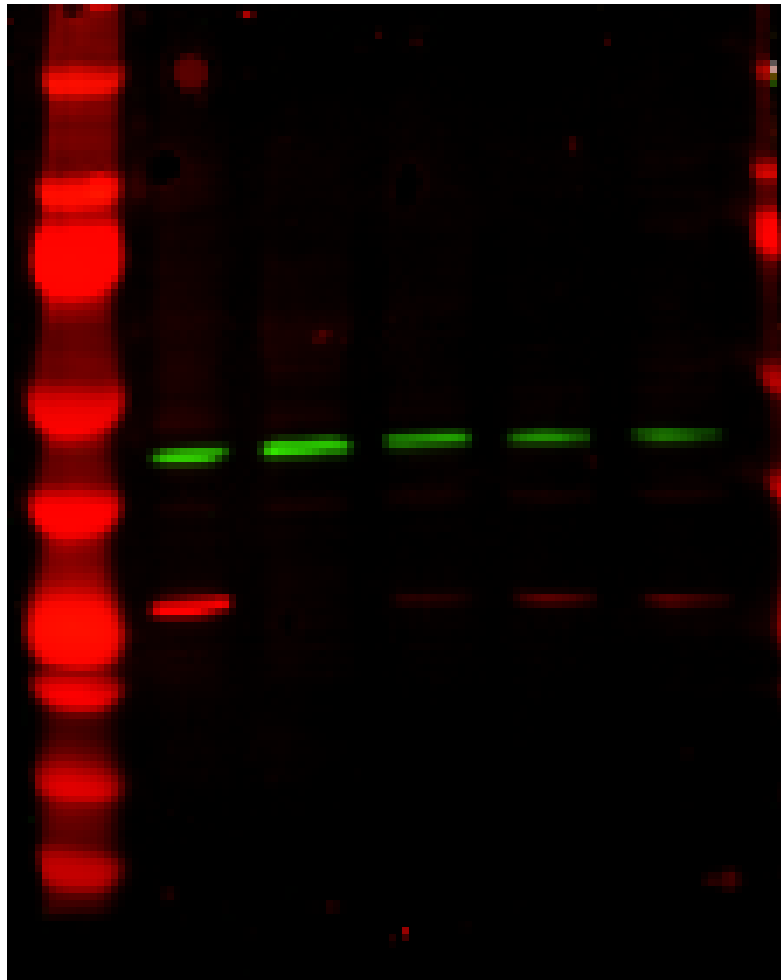

← b-actin

← CA2

# Raw western

Ladder mcf7 Mck-2 m1 m6 m6

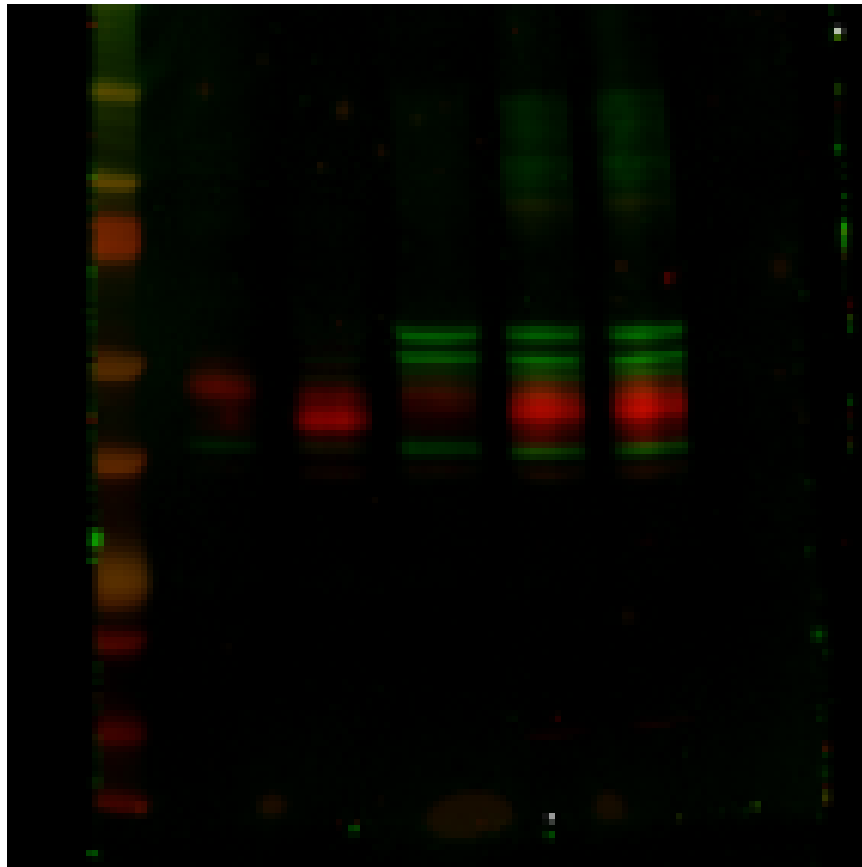

green – caix  
red- caxii

← CA-IX  
← CA-XII

# Raw western u2OS CA-IX

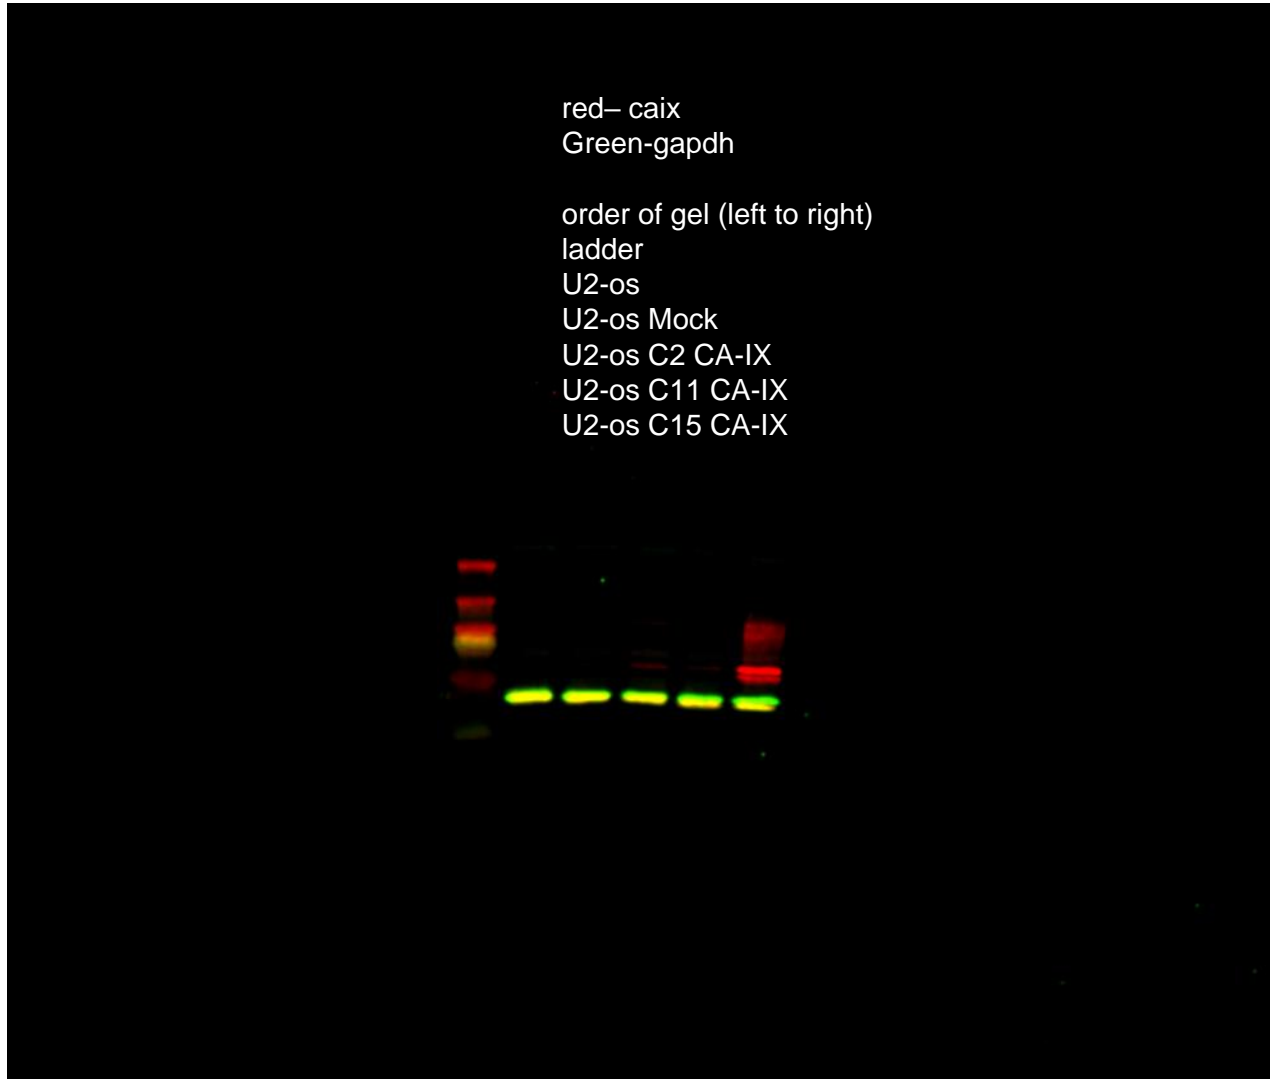

# Raw western – HEK293 CA-IX

red– caix  
Green-gapdh

order of gel (left to right)

ladder

Hek 293

Hek mock-2

Hek caix c2

Hek caix c3

Hek caix c7

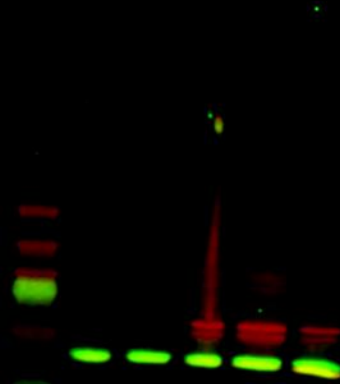



# Raw western – PMA1

PMA1 (100KDa)

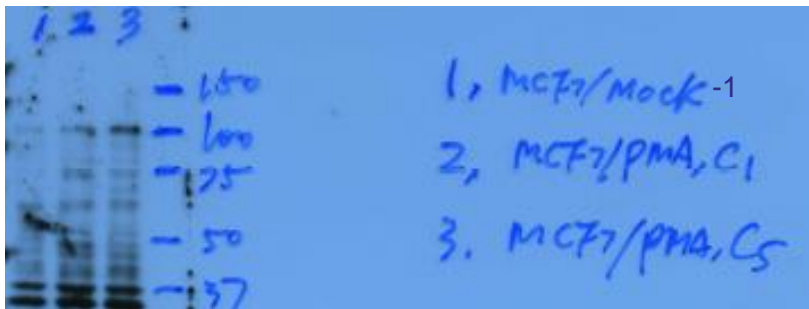

GAPDH (37KDa)

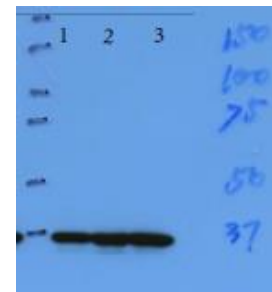

# Matlab code

```
clear all
% growth rates
GR MOCK=5.65773801;
GR_PMA1_C1=6.71474358;
H_C5=3.40938755;

% invasion assay
inv MOCK=[0.0281;0.0282;0.0259;0.0245];
inv_PMA1_C1=[0.0418;0.0419;0.0456;0.0399];
inv_PMA1_C5=[0.0282;0.0283;0.0294;0.0253];

norm_inv MOCK=inv MOCK/GR MOCK;
norm_inv_PMA1_C1=inv_PMA1_C1/GR_PMA1_C1;
norm_inv_PMA1_C5=inv_PMA1_C5/GR_PMA1_C5;

norm_inv_AVG=[mean(norm_inv MOCK) mean(norm_inv_PMA1_C1)
mean(norm_inv_PMA1_C5)];
norm_inv_STD=[std(norm_inv MOCK) std(norm_inv_PMA1_C1)
std(norm_inv_PMA1_C5)];

% wound healing assay
WH MOCK=[0.1157;0.1465;0.1368;0.1666];
WH_PMA1_C1=[0.5102;0.5413;0.5528;0.5712];
WH_PMA1_C5=[0.2866;0.2912;0.2511;0.2714];

norm_WH MOCK=WH MOCK/GR MOCK*GR MOCK;
norm_WH_PMA1_C1=WH_PMA1_C1/GR_PMA1_C1*GR MOCK;
norm_WH_PMA1_C5=WH_PMA1_C5/GR_PMA1_C5*GR MOCK;

norm_WH_AVG=[mean(norm_WH MOCK) mean(norm_WH_PMA1_C1)
mean(norm_WH_PMA1_C5)];
norm_WH_STD=[std(norm_WH MOCK) std(norm_WH_PMA1_C1)
std(norm_WH_PMA1_C5)];
```
